# Supplementary material for: Paternal nicotine exposure alters hepatic xenobiotic metabolism in offspring
Source: eLife. 2017 Feb 14;6:e24771. doi: 10.7554/eLife.24771 (PMC5340528; doi:10.7554/eLife.24771)
Supplement: Figure 2—source data 1. — Survival curve for all animals on the nicotine self-administration protocol. DOI: http://dx.doi.org/10.7554/eLife.24771.008 [file elife-24771-fig2-data1.xlsx]

## Sheet: Sheet1
Days elapsed	TA	NIC
1	25	23
2	25	23
3	25	23
4	25	23
5	24	23
6	24	23
7	24	23
8	24	23
9	24	23
10	24	23
11	24	23
12	24	23
13	21	23
14	15	23
15	10	23
16	5	22
17	2	21
18	0	19
19	0	19
20	0	19
21	0	15
22	0	11
23	0	8
24	0	5
25	0	2
26	0	2
27	0	2
28	0	2
29	0	2
30	0	2
31	0	2
32	0	2
33	0	2
34	0	0
35	0	0
