# Supplementary material for: Paternal nicotine exposure alters hepatic xenobiotic metabolism in offspring
Source: eLife. 2017 Feb 14;6:e24771. doi: 10.7554/eLife.24771 (PMC5340528; doi:10.7554/eLife.24771)
Supplement: Figure 4—source data 1. — RNA-Seq data for hepatocytes obtained from TA and NIC offspring, showing 60 genes (filtered for average expression >25 ppm) changing with a multiple hypothesis-corrected p value <0.1. Data are z score normalized for each culture time point. DOI: http://dx.doi.org/10.7554/eLife.24771.012 [file elife-24771-fig4-data1.xlsx]

## Sheet: Figure_4C_cluster
NAME	TA_DMSOMPV_HEPIV01QC07072016	TA_t1MPV_HEPIV12qc03122016	TA_t0MPV_HEPIV11qc03122016	TA_t3MPV_HEPIV13qc03122016	TA_DMSO_t2_noDEXMPV_HEPIV21QC08152016	TA_DMSO_t2_noDEXMPV_HEPIV06QC08152016	TA_t0MPV_HEPIV1qc03122016	TA_t1MPV_HEPIV2qc03122016	TA_t3MPV_HEPIV3qc03122016	TA_t21MPV_HEPIV4qc03122016	TA_DMSOMPV_HEPIV13QC07072016	TA_DMSO_t2_noDEXMPV_HEPIV01QC08152016	TA_t1MPV_HEPIV22qc03122016	TA_t0MPV_HEPIV21qc03122016	TA_t3MPV_HEPIV23qc03122016	TA_t21MPV_HEPIV24qc03122016	TA_t0MPV_HEPIV16qc04212016	TA_t1MPV_HEPIV17qc04212016	TA_t0MPV_HEPIV01qc04212016	TA_t1MPV_HEPIV02qc04212016	TA_t3MPV_HEPIV03qc04212016	TA_t21MPV_HEPIV04qc04212016	TA_t21noneMPV_HEPIV05qc04212016	TA_t21noneMPV_HEPIV5qc03122016	TA_t21noneMPV_HEPIV15qc03122016	TA_t3MPV_HEPIV18qc04212016	TA_t21noneMPV_HEPIV25qc03122016	TA_t21MPV_HEPIV19qc04212016	TA_t21noneMPV_HEPIV20qc04212016	NIC_DMSO_t2_noDEXMPV_HEPIV16QC08152016	NIC_DMSO_t2_noDEXMPV_HEPIV11QC08152016	TA_t21MPV_HEPIV14qc03122016	NIC_DMSOMPV_HEPIV19QC07072016	NIC_t1MPV_HEPIV7qc03122016	NIC_t1MPV_HEPIV17qc03122016	NIC_t0MPV_HEPIV16qc03122016	NIC_t3MPV_HEPIV18qc03122016	NIC_t21MPV_HEPIV19qc03122016	NIC_t0MPV_HEPIV6qc03122016	NIC_t3MPV_HEPIV8qc03122016	NIC_t0MPV_HEPIV06qc04212016	NIC_t1MPV_HEPIV07qc04212016	NIC_t3MPV_HEPIV08qc04212016	NIC_DMSO_t2_noDEXMPV_HEPIV26QC08152016	NIC_t0MPV_HEPIV11qc04212016	NIC_t1MPV_HEPIV12qc04212016	NIC_t3MPV_HEPIV13qc04212016	NIC_t21noneMPV_HEPIV15qc04212016	NIC_t21noneMPV_HEPIV10qc04212016
Animal ID:	6	2	2	2	10	9	1	1	1	1	7	8	3	3	3	3	5	5	4	4	4	4	4	1	2	5	3	5	5	19	18	2	17	11	12	12	12	12	11	11	14	14	14	20	15	15	15	15	11
Agpat6	-0.964492	-0.391369	0.219719	0.956248	-0.737721	-0.715904	-0.667021	0.643351	-0.381096	-0.301576	-0.581593	0.99594	-0.213555	-0.354088	-1.30815	-1.39393	-1.4281	-1.30476	-1.42018	-1.4858	-1.64622	0.531657	-0.614445	1.36146	-0.815592	-1.02534	-1.10016	-0.366442	-1.3403	0.252435	-1.09457	-0.169105	1.29088	1.91348	-0.420642	0.815922	0.960174	-0.088367	1.41386	0.507824	-0.117321	0.226868	0.624125	1.29982	0.286393	0.681387	0.519953	0.747842	-0.436528
Nr1h3	-0.525796	-0.179983	0.506725	0.897279	-0.419482	-0.586251	-1.14094	-0.559059	-1.06165	-1.57617	-0.896543	-0.726308	-0.044819	-1.16222	-0.724581	-0.223096	-0.676919	-0.613206	-0.52835	-1.36283	-1.49093	-1.32939	-0.212566	1.09093	0.136957	-0.432921	-2.14072	-0.436524	0.616341	-0.136518	-0.111767	-0.132578	1.38505	1.56508	0.798136	0.405135	0.92039	0.042037	1.53754	1.23215	-0.861045	-1.2366	-0.472202	1.98033	0.613296	0.331751	-0.105681	-0.96687	0.81602
Atp5a1	-0.260479	0.177032	0.585458	0.187567	-1.32002	-0.226565	-1.52425	-1.25433	-1.22233	-0.941966	0.001457	-0.592841	-0.656006	-1.28402	-0.39438	-0.574573	-1.17708	-1.48886	-0.412992	-0.672661	-1.20602	-1.1976	-1.16621	-0.334162	0.128214	-1.47269	-1.53623	0.695863	-0.389858	1.56268	-0.062678	1.35305	1.33338	0.999814	-0.17176	0.860786	0.973694	0.603736	0.954992	1.05834	0.444411	0.752934	0.78467	0.639428	0.967657	1.05005	0.350231	0.049085	1.42008
Fh1	-0.073196	-0.568312	0.104657	0.281098	-0.129736	-0.252315	0.552915	-0.057004	0.059869	0.83581	-0.946206	-1.4421	-0.414995	-0.985964	-1.53466	-0.468871	-1.52704	-1.52555	-1.38347	-1.1525	-0.867283	-0.898951	-0.676871	-0.338705	-1.30978	-1.5692	-1.23131	1.09285	-0.659326	1.26403	1.01668	1.2243	1.39845	1.10335	0.669433	0.59836	1.08598	1.17998	0.787304	1.00008	-0.296295	-0.250301	0.431688	-0.456559	0.8633	1.69245	0.982274	1.31909	1.43813
Eif4ebp3	-0.565021	0.162825	0.186286	0.128858	-0.627235	-0.481068	-1.6415	-1.62668	-1.09769	-0.888574	0.398845	-0.509404	-0.346162	-0.094153	-0.739936	-1.53037	-1.04094	-0.781719	-1.10948	-1.04576	-1.5088	0.365138	-0.677361	-0.263605	-0.096557	-0.533225	-1.28432	-0.014765	0.34018	-0.863815	0.859641	0.076746	-1.0367	1.53839	0.472112	0.132773	0.365133	0.002365	1.33095	0.976128	0.918366	1.36967	1.8423	1.62188	0.186216	0.174756	0.404211	0.247017	-1.45329
Acaa1a	-0.049392	-0.27889	-0.230628	-0.012491	0.211523	1.77876	0.666846	0.120506	0.825436	-0.182141	0.508471	-0.816673	-0.711974	-0.897519	-1.36974	-1.24118	-1.22341	-1.51048	-1.04409	-1.56475	-1.43627	-1.04665	-1.03859	-0.491784	-1.14348	-1.14694	-0.602978	-0.565766	-0.732153	-1.0394	-0.199298	-0.623441	0.917989	0.730902	1.37866	0.175969	0.43026	-0.240333	1.72311	0.788093	-0.718312	0.375166	-0.17647	0.065079	1.2187	0.848874	1.16212	2.03932	0.677697
Mdh1	0.674369	-1.2425	-0.61835	-0.978072	-0.579427	-0.507332	-1.44147	-1.86967	-1.82311	-1.01701	-1.24705	-1.10408	-0.934535	-1.11343	-1.20742	0.018235	1.08241	0.451866	-1.17579	0.510652	0.160927	-1.68113	-1.07639	-1.42843	-0.902307	0.201616	-0.480425	1.13118	0.654902	-0.168388	0.745699	0.161489	0.929037	0.551666	1.23164	1.06837	0.690548	1.5744	1.01057	1.07197	0.523081	0.275083	0.558799	1.61353	0.54311	0.19734	0.226757	1.47368	1.45371
Ugt2b1	1.26067	-2.15457	-1.67879	-2.15266	-0.614085	-0.253658	0.03163	0.09405	-0.023589	-0.521561	-1.05778	-1.15619	-0.379222	-0.627946	-0.289507	-0.310451	-0.660895	-0.608591	-0.232191	1.05016	0.555757	-1.08168	-0.851911	-1.34647	-1.09981	-1.16735	-0.035645	-0.699785	0.07254	-0.427638	1.09578	-0.087721	0.266813	0.261733	1.02136	0.898969	0.422934	0.468067	1.35445	1.16226	0.640118	0.709085	0.689302	1.35579	1.18744	0.750482	0.777581	1.5199	1.68526
Fcgrt	-0.872345	-2.00584	-0.092745	0.523885	-0.547427	-1.5489	-0.406283	0.179757	1.0468	0.382813	-0.586265	0.217134	-0.332339	-1.16081	-1.16959	-0.606014	-0.680146	-0.588087	-1.27723	-0.565925	-2.00676	-0.829716	-0.873188	-0.721494	-1.40963	-0.275604	-0.466158	-0.680558	-0.297714	0.714578	-0.147515	0.213427	1.37411	1.51923	-0.299454	1.04513	0.721086	0.066836	1.04856	0.814704	0.620052	1.14939	0.691915	1.31213	1.54731	0.516434	0.29385	1.88277	0.875673
Nnmt	-0.330943	-0.595016	-0.625408	-0.673655	-1.44748	-0.629204	-0.566578	-0.238946	-0.258008	-0.536454	-0.680037	-0.306696	-0.865634	-1.20819	-1.11788	-1.02213	-0.481402	-0.524638	-1.03159	-1.14024	-1.48623	-2.05568	-1.25848	-1.11661	-1.15061	-0.249831	-0.837309	0.842718	0.177353	0.421502	0.585518	-0.098111	-0.473537	-0.073569	0.812928	0.760028	0.627456	1.32395	0.344689	0.343773	0.240693	0.124384	0.40801	1.37636	0.423317	0.142304	0.371019	1.1732	1.31545
Atp5h	-0.418778	0.380071	-0.718598	-0.391294	-0.659929	-0.372202	-0.751768	-1.44045	-0.947709	-0.349658	-0.081033	-0.666385	-0.262337	-0.324046	-0.42872	0.563694	-1.00832	-1.85811	-0.750988	-0.29418	-1.87899	-1.38308	-1.22102	-1.82334	-0.817136	-0.596492	0.070267	-0.539535	0.017731	-0.852431	1.24731	0.965992	1.41033	1.13135	0.981389	1.43336	1.0306	1.56355	0.022381	0.916861	-0.143294	0.080127	0.952332	1.30364	0.213556	0.866112	0.383227	0.346506	1.36628
Asl	-0.444433	0.263932	0.364704	0.381122	-0.306815	-0.946574	-1.02045	-0.630111	-0.533114	0.123541	0.12748	0.145487	-0.073454	0.419488	-0.345203	-0.14669	-1.42623	-1.67841	-1.6941	-1.59884	-2.1428	-1.6764	-1.08449	-1.02114	-0.980994	-0.958514	-0.335141	-0.724488	-0.244779	0.80054	-1.13096	0.567726	1.32809	0.451052	0.497173	0.91082	1.13817	1.21243	0.474513	0.550429	0.152078	0.610675	0.631257	1.43832	0.990259	1.04332	0.890955	2.08787	0.916419
Lpin1	0.05598	-0.237842	-0.032055	0.384284	-0.024923	-0.472015	-1.32198	-0.716067	-0.905381	-0.337485	-0.910879	-0.253313	-0.430127	-0.353247	-0.935191	-1.05968	-1.05251	-0.76129	-0.720701	-0.916383	-0.96896	-0.512954	-0.764487	-0.874346	-0.892861	-0.738486	-0.374785	-1.03724	-0.509689	-0.921334	-0.274715	-0.034054	-0.521693	1.13085	-0.488127	-0.02444	-0.14441	-0.339766	1.11957	0.70331	2.00208	2.19048	2.1718	1.9463	0.477629	0.606669	0.633523	1.19669	2.06614
Rapgef4	-0.868179	-0.218083	-0.126024	-0.019447	-0.652646	-0.606477	-0.70688	-0.022949	-0.44459	0.063688	-0.585596	-0.622976	-0.137849	0.238193	-0.384658	-0.533116	-0.567068	0.063376	-1.77581	-1.91658	-1.63695	-1.32104	-1.15451	-0.765454	-1.29947	0.229566	-0.260576	0.109545	0.493249	-0.315961	0.292006	-0.412504	0.076268	1.54069	-0.079068	0.071962	-0.284448	0.376417	1.79789	1.71725	1.23067	1.57992	1.46506	1.90605	-0.387436	-0.243677	0.198493	0.86028	1.65509
Gpcpd1	1.37621	-0.664065	-0.523968	-0.676425	-0.397979	-1.29933	-0.519521	-0.548085	-0.155738	-0.370998	-0.556699	0.3632	-0.396043	-0.262326	-0.590237	-0.714568	-1.05411	-1.17083	-0.875428	-0.840888	-0.674169	-0.716912	-0.304419	-0.423218	-0.546213	-1.17349	-0.777998	-0.968593	-0.493909	-0.274876	-0.104209	0.079023	-0.889518	-0.178525	0.720549	0.579868	0.331772	0.712405	0.117447	0.121631	2.46134	2.26659	2.47407	1.71319	0.259757	0.461557	0.041593	0.778996	2.58948
Ugt2a3	-0.066363	0.021397	0.562405	-0.375435	-0.954643	-0.517841	0.190165	0.682834	-0.206883	-0.454323	-0.361061	-0.593222	0.122541	-0.210035	-0.013705	-0.463993	-1.54556	-1.92799	-1.57717	-1.44639	-0.922455	-0.905649	-0.823611	-0.847876	-0.736601	-1.73301	-0.425259	-0.383804	-0.250249	-0.155608	0.411638	-0.277981	1.3914	0.562304	1.32236	1.19052	0.671781	-0.019515	0.846535	1.47815	0.9616	0.74821	1.49405	1.80968	0.329748	-0.24363	-0.286819	0.81702	2.44241
Sult1d1	1.16759	-0.496978	-0.366639	-0.743922	-0.215708	-0.388983	0.06082	-0.527516	-0.139115	-0.283624	-1.09528	-0.531142	-1.22934	-1.18691	-1.26514	-0.773137	-0.874249	-0.488225	-1.69051	-1.5277	-1.38864	-1.05616	-0.592247	-0.923512	-0.843634	-0.851645	-0.855422	-0.338679	-0.461396	-0.658286	-0.215882	0.845492	0.429945	0.375906	1.17624	1.08926	1.09154	2.17878	0.523405	0.983348	1.2866	1.12695	1.01693	2.01	0.430012	0.388363	0.383976	1.21217	2.11066
Etnk2	-0.393225	0.205675	0.052926	-0.130521	0.209807	-0.785326	-1.44185	-1.1909	-0.936005	-0.324798	-1.15542	-0.538727	-1.00554	-1.04564	-1.25975	-1.67687	-0.574256	-0.497334	-0.131125	-1.21881	-1.21936	-1.13637	-1.00159	-1.05101	-0.968838	-0.127126	-0.536227	0.394215	0.384078	-0.635838	-0.1529	0.058293	1.16881	0.355487	1.06712	1.59333	1.52777	1.37568	0.106864	0.330618	0.490013	1.03345	0.797339	1.90298	1.53239	1.54196	1.3513	2.1226	0.98218
Tat	-0.689399	-0.568451	-0.385353	-0.10003	-0.33888	-0.941857	-0.859422	-0.357211	-1.10772	-0.41766	-0.588669	-0.667674	-0.549915	-0.551833	-0.274489	-0.67954	-0.471084	-0.753441	-1.33971	-1.42834	-1.50799	-1.28766	-1.03558	-1.00852	-1.14813	-0.402644	-0.157678	0.34757	0.526275	-0.202215	0.301107	-0.088607	-0.186032	0.659391	0.699033	0.866367	1.04115	1.49538	0.566643	0.298009	1.12866	1.07673	1.08208	1.84952	1.72688	1.79629	1.58938	2.10025	0.666631
Pah	1.14113	-0.506498	-0.165917	-0.410002	-0.615681	-0.423491	-0.593365	-0.336589	-0.10679	-0.260725	-1.18398	-0.827973	0.263331	-0.657746	-0.798164	-0.645916	-1.07377	-1.15796	-1.36631	-1.79916	-1.44139	-1.37999	-0.976156	-1.13675	-0.917576	-0.967111	-0.386942	-0.290237	0.046789	-0.052285	-0.017836	0.218465	0.405538	0.548278	0.742767	0.958236	1.58006	1.73771	0.915201	0.823482	0.595841	0.78269	0.496446	1.93727	1.71717	1.58235	1.25147	1.72052	1.4188
Akr1c14	0.246888	-0.011265	0.485904	-0.318698	-0.310812	-0.023606	0.093516	0.16432	0.025977	-0.453766	-1.43364	-0.953343	1.12177	-0.16173	0.51353	-0.038472	-1.38732	-1.38792	-1.96638	-2.00701	-1.92375	-1.59697	-0.94648	-1.01862	-0.814267	-1.3155	0.073051	-0.619222	-0.344123	-1.04921	0.88352	0.723307	0.293781	-0.05253	0.772142	0.582534	0.432965	1.13951	0.822225	0.960907	0.992154	0.826066	1.00633	1.45345	0.899076	0.683304	0.975473	1.7828	1.60554
Upp2	-0.48711	-0.225163	-0.202972	-0.51031	-0.307211	-0.768423	-0.614607	-0.456928	-0.673761	-0.716597	-0.750428	-0.083828	-0.560441	-0.685677	-0.475631	-0.728968	-0.903551	-1.01655	-0.95938	-0.961212	-0.840054	-0.815959	-0.739221	-0.875747	-0.769556	-0.828773	-0.647899	-0.507449	-0.207332	-0.988229	0.357871	-0.490571	1.46548	0.315126	0.94968	0.867667	0.960592	0.730405	0.576338	0.577284	1.58619	1.65853	1.61999	1.78982	1.33346	1.30457	1.26261	1.92871	1.53262
Tdo2	-0.575765	-0.454076	-0.074805	-0.5922	0.176156	-0.96038	-0.022893	-0.089847	-0.537785	-0.640761	-1.07194	-1.51165	-0.223141	-0.792617	-0.605546	-0.759922	-0.108743	-0.167292	-1.15877	-0.607774	-0.543452	-1.01325	-0.799222	-0.941816	-0.861322	-0.236274	-0.432301	0.127665	0.30804	0.716653	0.767257	-0.350607	1.10843	-0.076382	0.612827	0.368819	0.632722	0.565602	0.785383	0.987315	1.33206	1.81133	1.67752	0.811962	1.32405	1.07226	0.863246	1.66867	1.71993
Acsm3	0.23011	1.13229	0.187833	0.292154	-0.665251	0.038356	-0.330434	-0.901626	-1.17424	-0.639519	-1.05921	-0.092834	-1.00641	-0.897721	-0.637195	-1.10906	-0.813766	-1.09182	-1.68039	-0.26471	-0.970443	-0.794875	-0.295214	-0.668057	-1.16131	-0.559249	-0.838248	0.096802	0.778029	-1.02706	-0.118286	0.30418	1.27519	0.742052	0.505504	1.23732	1.00796	0.755612	1.14469	0.984185	1.12269	1.49798	1.53794	1.86508	0.495277	0.527588	0.598992	2.26396	0.099444
Thrsp	-0.135466	1.33317	1.15517	1.37637	-0.315976	-0.769527	-1.46439	-1.24773	-1.291	-0.996465	-1.31433	-0.266404	-0.936556	-0.758664	-0.537506	-0.588156	-1.25285	-1.16614	-0.689161	-0.756666	-0.873507	-1.20011	-0.946424	-1.14259	-0.780949	-1.18267	-0.410194	-0.78696	-0.351386	-0.568587	-0.056998	1.03325	1.04367	0.9261	0.907587	1.00311	1.22765	1.19976	0.960437	0.581885	0.961854	1.01677	0.924222	1.97749	0.189852	0.224567	0.249868	1.7015	1.17641
Slc37a4	-0.272499	0.849982	0.928019	0.779723	0.248531	-0.723881	-0.643235	-0.638872	-0.828184	-0.770086	-1.27858	-1.12678	-0.19174	-0.775775	-0.204202	0.074952	-0.430465	-0.97821	-1.56669	-1.62989	-1.64601	-1.61925	-1.28329	-1.0145	-0.586146	-0.974335	-0.315446	0.213596	0.39609	-0.618239	0.72458	0.60714	0.985377	0.728614	1.28376	1.35637	1.21595	1.6302	0.677581	0.818016	1.19752	0.465976	0.891608	1.49578	0.115276	1.00835	0.702317	1.03704	1.89555
Slco1a4	-0.323825	0.37298	0.755197	0.478214	1.12715	-1.12434	-0.730711	-0.965182	-0.716875	-0.616439	-0.550597	0.639815	-0.48193	-0.864506	-0.700679	-0.746254	-0.823264	-0.955991	-1.08961	-1.025	-0.978104	-0.821216	-0.814814	-0.889426	-0.694601	-0.974802	-0.608457	-0.481783	-0.490715	-1.32174	0.141554	0.24759	1.48832	0.415319	1.97039	1.55746	1.82803	1.98221	0.646585	0.430316	0.973226	0.944644	1.0774	0.537561	0.625178	0.473674	0.510878	1.44699	1.74449
Bckdha	-1.27668	-0.473715	0.021512	0.19975	-0.420275	-0.447445	-0.577935	-0.328363	-0.836454	-0.571028	-0.285399	-0.029074	-1.0182	-0.599371	-1.53435	-0.665729	-0.322734	-0.542645	-0.617996	-0.644865	-0.768468	-0.443775	-0.819227	-0.720034	-1.27177	0.138599	-0.717801	0.220982	1.02987	-0.171376	-0.884093	-0.520428	0.966211	-0.012923	-0.230479	0.066425	0.945509	0.00301	0.867598	0.62515	0.67843	2.12992	0.990435	1.95226	2.04282	1.4832	1.34505	1.25118	1.65383
Dio1	0.330366	-0.405885	-0.199301	-0.152831	-0.59024	1.02605	0.124826	0.778104	0.544271	0.15737	-1.48667	0.251055	-0.315043	-0.380659	-0.757608	-0.947787	-1.22783	-1.17084	-1.42853	-1.44093	-1.71245	-1.12657	-0.805153	-1.02477	-1.01433	-0.604187	-0.309325	-0.744642	0.002142	-1.58703	-0.103096	-0.448469	0.656112	0.62728	0.845713	0.80019	0.410217	0.452542	0.8697	1.59874	1.08873	1.31308	0.820989	1.00326	1.3182	0.839174	0.763038	1.23741	2.11386
Adk	0.283326	-0.353602	0.579882	0.382886	-0.625882	-0.119924	-0.268857	0.079032	-0.110201	-0.226564	-1.01319	-1.00758	0.455169	-0.422883	-1.0731	-0.503131	-1.37581	-1.32329	-0.810647	-2.02045	-1.43095	-1.22304	-0.763853	-1.22593	-1.1746	-1.36713	-0.126567	0.16412	0.272674	-0.67643	0.924129	1.57658	1.26683	0.992918	1.2011	0.842036	1.23537	1.75302	0.327278	0.671125	1.52939	0.545433	1.30865	1.50569	0.945953	0.13289	0.263867	1.33211	1.89267
42431	0.928843	-1.10819	-1.14631	-0.98779	-0.489529	-0.054514	0.777519	-0.694866	-0.262878	-0.17954	-0.822798	-0.62998	-0.255014	-1.40841	-1.1963	-1.09188	-1.15807	-1.01136	-0.292443	-0.057051	-0.731762	-0.935452	-0.616728	-1.10964	-1.41889	-0.636777	-0.489389	0.368046	0.266954	-0.359219	-0.469515	0.807288	0.799805	-0.058162	0.958132	0.733624	0.500624	1.59044	0.621969	0.52765	-0.077651	0.367751	0.586569	2.00276	0.327069	-0.377102	0.030629	1.94261	1.04283
Prodh	0.14472	0.33836	0.233598	0.79755	-0.074805	-0.116	-1.08048	-0.963858	-0.636751	0.020621	-1.31445	0.686091	-1.33984	-1.35947	-1.18036	-1.46279	-0.465038	0.14662	-1.11616	-1.16967	-1.13847	-1.13476	-1.13967	-0.84235	-1.11766	-1.06492	-0.775002	0.246883	0.68005	-0.26835	-1.59881	1.18005	1.11738	-0.740958	1.29773	1.38236	1.7467	1.85566	-0.067063	-0.072659	0.536872	0.44002	0.478824	1.37187	0.52541	0.570522	0.907204	1.03617	1.75689
Upb1	0.760746	1.03668	-0.190453	-0.424243	-0.425791	0.516286	-1.04663	-1.1649	-1.35833	-0.927007	-0.860076	-0.333437	-0.783788	-1.7276	-0.523203	-0.757917	0.518422	-1.40886	-0.390092	0.14583	-0.56293	-1.42986	-0.584244	-1.31446	-0.950932	-0.207815	-0.316145	-0.429712	0.1456	-1.31463	-0.087161	0.558143	0.965252	-0.738111	1.43799	0.901865	0.692511	0.826701	0.821769	-0.052738	1.29559	1.07127	2.21921	1.64473	0.708197	0.432177	0.783387	1.27066	2.02991
Cyp7a1	0.987404	-0.025181	0.129711	-0.11195	-0.575403	-0.099394	-0.326019	0.019009	-0.313128	-0.666024	-1.22749	-0.361132	-0.121042	-0.337276	-0.385825	-0.802398	-1.03152	-1.10882	-0.648238	-0.856353	-0.796667	-0.950424	-0.816962	-0.822226	-0.676871	-0.985019	-0.284731	-0.937825	-0.976785	-0.921564	0.039744	-0.28594	0.614752	0.806412	2.35264	2.20171	2.05626	1.32995	1.2755	1.51605	-0.139221	-0.047235	-0.19131	1.91775	-0.286032	-0.113197	-0.032545	1.16095	0.998031
Sds	-0.691202	-0.315656	0.27063	0.072391	-0.58879	-1.56087	-1.25097	-1.59527	-1.3377	-0.870452	1.48551	1.17973	-0.587553	-0.664703	-1.0783	-1.4141	-1.0098	-0.399111	-0.109281	-0.11437	-0.404805	-1.12553	-0.759917	-1.04702	-0.913892	0.020691	-0.52964	0.226682	0.195965	0.383755	-0.209989	-0.183893	-0.393799	-0.167108	0.145889	0.727671	0.203205	0.401907	-0.209658	-0.282818	1.66038	2.08126	2.13318	0.796165	1.38522	1.18446	1.03683	1.40136	2.00381
Uqcrfs1	-0.391644	-1.17428	1.29148	-0.643086	-0.481045	-0.361962	0.425112	-1.13035	-0.062097	-0.0673	0.029926	-0.696634	1.22074	-0.715778	-0.301386	-0.806795	-0.983826	-0.270239	-0.563836	-1.52378	-1.50054	-1.43603	-0.305636	-0.328738	-1.6584	-1.3606	-0.794388	-0.071875	-0.874567	-0.118909	-0.346044	0.434259	1.3599	1.22163	0.168348	0.630337	0.278679	0.665024	1.70942	1.43931	-0.569228	0.698629	1.2104	2.00459	0.081357	0.132016	0.061358	0.815119	0.975034
Dcxr	-0.296983	-0.129917	-0.636869	-0.267822	0.476787	-1.68009	-1.82646	-1.6113	-1.09114	0.244689	-0.422881	0.178659	-0.727551	-0.735572	-1.74697	-0.798322	-0.776057	-1.04699	0.672129	-0.215048	-0.900466	-0.180412	-0.754254	-1.28188	-0.945396	0.397775	-0.332821	-0.340397	1.34626	-0.223808	-0.113547	0.786866	1.47211	0.147992	1.5694	1.04692	1.47615	1.93495	1.13758	0.322113	-0.3526	0.241208	0.648353	1.362	0.552326	0.337659	0.99237	1.89794	0.347935
Cyp2c68	0.899897	-0.399551	-0.567591	-0.414811	-0.194504	-0.193504	-0.877205	-0.507337	-0.808377	-0.834296	-0.598422	-0.479552	-1.20462	-0.92335	-1.01133	-1.03638	-1.20271	-1.04032	0.078744	1.00683	0.582277	-0.772738	0.001399	-1.22191	-0.780727	-1.48473	-0.713993	-1.15559	-0.596906	-1.42371	1.29201	1.26201	0.794416	0.306054	1.28709	1.99647	1.49376	1.37882	0.656307	0.672075	1.07399	1.60393	1.24135	0.99926	-0.169583	-0.80852	-0.552086	0.372719	2.36245
BC089597	1.37309	0.010982	0.468549	-0.615797	-1.61245	0.77589	-1.47691	-0.928947	-2.07007	-1.22123	-0.269624	0.053598	-1.83708	-1.17616	-0.358443	-0.310966	-0.582523	-0.226434	0.004264	-0.007558	-0.460285	-1.01902	-0.581557	-1.71036	-0.487189	-0.142762	-1.08833	-0.358866	0.307195	-0.102519	-0.391705	0.98753	-0.086373	-0.219997	0.681828	1.31465	0.456238	1.64175	-0.185281	1.43947	1.75427	1.79468	1.07045	1.27718	-0.181079	-0.228838	-0.057384	1.62376	1.02101
Cyp1a2	1.1282	-1.11602	-1.00074	-0.373303	0.365525	1.03392	-0.574506	-0.057408	-0.063334	0.62568	-0.640024	0.271537	-1.64743	-1.24612	-1.57933	-1.58337	-0.984837	-0.57798	-0.210151	-0.369428	-0.830902	-0.33281	-0.684721	-0.091374	-1.28882	-0.90467	-1.37364	-0.88703	-0.430435	-1.67978	-0.667162	0.264395	0.529986	0.271261	0.570025	1.47651	1.21163	0.220564	0.207733	-0.106267	0.194727	0.079816	0.05511	0.675952	1.59606	1.65658	1.38027	1.50769	0.754594
Gulo	1.07706	-0.971343	-1.16057	-1.15989	0.029891	1.34735	-0.023287	0.418746	0.583873	1.09147	-0.749898	-0.714507	-1.47985	-1.85218	-1.40754	-1.35277	-0.749331	-1.29483	0.266643	-0.1429	-0.17608	-0.476409	0.003798	-0.668847	-1.30059	-1.16731	-1.42603	-1.13911	-0.737265	-1.46925	0.710916	0.614204	0.618754	0.43787	1.46042	1.48764	1.60217	1.64273	0.157033	0.761624	0.580431	-0.117401	-0.123061	0.095601	0.348478	0.506271	0.237434	1.36847	0.454394
Cisd1	-0.042684	-1.39688	-0.325596	-0.586967	-0.296378	-1.37223	-1.52949	-1.28883	-0.065438	-0.209324	-0.882713	-0.178951	-0.342696	-0.543498	-1.85127	-0.491334	0.724542	-0.173449	-1.39707	0.107989	-1.32406	-0.618377	-0.992647	-0.219571	-0.816172	0.639328	-1.11788	1.53878	1.09081	-0.482414	1.32311	-0.789868	1.40896	-0.899093	1.18426	0.715149	1.20731	1.68574	1.17823	0.258551	0.783385	0.519011	0.686659	1.00687	0.968989	1.39674	1.03254	1.45482	-0.62788
Nr1i2	0.618415	-0.374174	-0.323999	-0.486387	-0.403561	-0.223263	-1.46127	-1.49011	-1.28851	-0.179269	-0.020852	-0.038017	0.043132	0.215544	-0.830541	-1.22361	-0.477587	-0.655943	-0.988757	-1.14822	-0.717826	-0.614197	-0.154993	-0.427615	-0.962062	0.454474	-0.797869	0.293349	-0.084499	-1.52427	0.912416	-1.02673	0.805434	-0.216869	0.363976	1.98469	1.01579	0.61973	0.889854	1.23846	-0.400183	0.50743	-1.04022	1.27669	0.759802	1.62556	1.40823	2.08189	-0.075927
Fam35a	-0.748673	-0.167764	0.171976	0.536242	-0.921733	-0.769947	-1.21203	-0.770499	-0.980809	-0.621685	-0.526064	-0.508551	-0.404419	-0.645332	-0.25902	-0.409482	0.056412	-0.12968	-0.876162	-1.49685	-1.11143	-0.844192	-0.696053	1.66861	0.760889	-0.138378	-1.08295	-0.957381	-1.05368	-0.101252	0.584922	-1.02005	-0.184297	1.80466	1.02193	1.5413	0.172101	0.539778	1.78671	2.33186	0.200599	0.649876	0.474495	1.71656	-0.209903	0.489717	-0.187524	-0.316427	-0.105418
Dctpp1	-0.054635	0.593339	0.295875	0.074758	1.08851	-0.388014	-1.13495	-0.09295	-1.15694	0.475308	-1.28559	-1.54803	-0.072371	-0.660281	-0.440505	0.04094	-0.878474	-1.55909	-1.50791	-1.59242	-1.5404	-0.910609	-0.052224	-1.02158	-1.07089	1.22046	-0.1592	-0.621879	-0.882975	-0.480254	0.384556	-0.703949	1.14243	0.225585	0.8096	-0.062821	0.066306	0.164667	1.31712	1.17961	1.03662	0.145002	-0.365764	0.943231	0.627413	1.70686	1.37753	0.503571	0.856729
Ndufb5	0.496557	0.090437	-0.547374	-1.10071	0.43858	-0.80779	-1.88683	0.799924	-1.06814	0.52102	-1.3538	-1.4061	-1.43834	-0.650053	0.635848	-0.617369	-0.067453	-1.6784	1.39182	-0.088694	-1.03565	-1.24108	-0.965633	-1.21916	-0.196242	-0.626078	-0.673461	-0.885245	-0.461192	0.193765	0.123753	0.639705	0.954562	-0.578025	0.305644	-0.062523	-0.172816	0.573353	1.30282	0.558638	-0.264708	0.925549	0.997441	1.45779	-0.198235	0.201239	-0.043245	0.389286	2.14079
1300017J02Rik	0.685145	-1.66007	-0.912993	-0.042615	-0.771657	0.141862	-1.32105	0.188464	-0.974822	0.064949	-0.343481	-0.383387	-0.700911	-0.762066	-1.11468	-1.09875	0.227091	0.425244	0.238435	-0.227185	-1.28677	-1.08343	-0.68509	-1.10017	-1.45988	-0.106235	-0.45694	-0.440185	0.409418	0.757476	-1.21955	-0.090854	0.914117	-0.548005	-0.894954	-1.07022	-0.170082	-0.42802	1.01953	0.435532	0.017717	0.792805	0.379964	1.47525	0.920458	0.918062	0.879065	1.57639	1.10788
Hint2	-0.285822	-1.0837	0.703226	0.108524	-0.139953	-0.434981	-1.89423	-0.966289	-1.09332	0.603663	-0.770415	-0.761002	-0.869352	-0.274341	-1.05031	-0.441776	-1.19116	-1.28063	-0.484479	0.466665	-0.76399	-0.763618	-0.180613	-0.975457	-0.258584	-1.29416	-0.456015	0.030317	-0.229469	-0.878511	1.81022	0.821656	1.46805	0.770322	1.38844	0.512935	0.118702	0.380285	-0.253264	0.781777	1.20006	0.081409	1.54072	0.404226	0.777971	0.182753	1.00967	2.0355	-1.57299
Rpl28	-0.401658	1.5404	0.556905	1.42412	0.467198	0.339101	1.55622	-0.203624	-0.740965	0.962999	1.46871	1.3524	-0.348824	0.593025	0.400973	0.411182	-0.947679	0.14183	0.192053	0.928911	-0.996695	1.62533	0.926951	1.21831	1.48167	1.95749	-0.295114	0.349441	0.121733	-0.142309	-1.63453	-0.479305	-0.296588	0.425345	0.564256	-1.04309	-0.037874	-0.094031	-0.760047	-0.166779	-0.04134	-0.157829	-0.554505	-0.38186	-1.33917	-2.10834	-0.273016	-0.135326	-1.83833
Fam210b	0.094923	0.683079	0.18031	1.7603	-0.98039	0.869256	-0.522264	-0.378744	-0.565043	-0.97236	0.828339	1.54558	0.521488	0.370691	0.213226	-0.312012	0.661611	-0.077519	1.77488	1.65284	1.2374	1.78892	1.10538	1.63862	0.55848	-0.142476	0.499624	0.859208	-0.106422	-0.486504	-0.15116	-0.197962	-1.43082	0.643782	0.194676	0.912841	-0.78759	-0.037985	-0.653862	0.70269	-0.004359	-0.236377	-0.854624	-0.796785	-1.28995	-1.92718	-1.45937	-1.71639	-0.919046
Dnm1l	-0.172284	0.837116	1.10259	0.968455	-0.273071	1.17173	-1.42709	0.273313	1.48314	0.297951	0.816394	1.03866	1.06032	-0.036763	-0.308151	1.08705	0.977845	0.936049	0.391065	0.183626	0.656931	1.86218	0.641666	1.77909	1.00247	-0.258069	0.002383	-0.276809	-0.718088	-0.190166	-0.198589	0.15278	-1.34587	0.725485	-0.936845	0.571202	-0.39173	0.342182	0.743281	0.408547	0.290736	-1.77141	-1.76837	-1.54857	-0.945553	-1.2837	-1.26403	-1.49418	-1.20434
Ywhah	-0.007852	1.25616	0.523915	0.338458	0.191079	0.485486	1.35281	1.32933	1.25989	0.011703	1.26272	0.685216	0.809085	1.276	0.185427	-0.030925	0.203135	-0.936764	-0.429108	0.286976	0.787526	2.5367	0.93324	1.33665	1.5321	-1.39315	-0.057029	0.690651	-0.51389	0.85346	-0.374056	-0.622799	-1.18337	0.073922	-0.138042	0.649032	0.31866	-0.733312	-0.49099	0.641382	-0.663625	-0.526552	-1.47029	-1.84118	-1.92055	-1.91925	-1.28394	-1.29956	-1.25422
Xpo1	1.2658	-0.320652	-0.192128	-0.575436	0.769215	0.83332	2.0226	0.121672	1.14387	-0.279156	0.144714	0.868282	0.625924	0.592798	0.067727	-0.248917	-0.06405	-0.514291	0.532889	2.16347	1.49009	2.64249	1.55846	1.2747	0.776186	-0.291124	0.040695	-0.108059	-0.717565	-0.329015	-0.542668	-0.012759	-1.14231	-0.118271	-0.060473	-0.340876	-0.504041	-0.567795	0.497686	-0.21477	-1.18362	-0.839036	-1.16386	-1.59913	-1.53605	-1.59309	-1.27908	-1.35237	-1.32429
Cald1	-0.394224	-0.81097	-1.00589	-0.652241	0.856284	0.703245	-0.236046	-0.302759	0.284167	0.597782	1.43029	0.654777	-0.597693	-0.110101	-0.337887	-0.097575	2.20409	1.82495	0.777729	1.70261	1.48074	2.03395	0.627761	1.96294	0.923197	1.59389	0.121678	0.722035	-0.164353	0.206339	-0.779536	-0.972748	-0.155983	-0.5178	-0.766643	-0.500828	-0.529917	-0.185722	0.1466	-1.26436	-1.01785	-0.497803	-1.00032	-1.64111	-0.875829	-0.546032	-0.36833	-1.06353	-1.4302
Sigmar1	1.49671	-0.44962	-0.584265	-0.189385	0.614819	0.923291	-0.539676	-0.500653	-0.545846	-0.817675	-0.418777	0.906533	-0.337204	0.068822	-0.335301	-0.032585	2.24576	2.45205	1.24673	1.10253	1.45714	1.85447	0.234508	1.60607	0.742106	2.06788	0.770761	1.29283	0.299296	-0.593784	-1.58963	-0.584436	-0.496944	-0.635136	-0.274732	0.062828	0.035574	-0.541521	-0.498641	-0.94657	-0.964834	-0.698623	-1.0121	-0.261235	-0.666634	-0.433002	-0.479687	-1.18925	-1.88213
Rnf125	-1.39013	-0.655509	-0.804084	-0.245057	0.142742	0.960951	-0.12626	-0.255856	-0.16152	0.097444	0.643068	0.730347	-0.25452	-0.312594	0.03606	-0.194626	1.83386	1.5107	1.60973	1.97247	2.10257	1.67528	1.54938	-0.35641	0.270732	1.34981	0.197339	1.71161	1.90133	0.51308	-0.671039	0.244401	-0.059464	-0.932591	-0.92576	-0.927384	-0.730169	-0.190199	-0.885027	-0.857049	-0.553397	-0.551083	-0.917568	-1.67608	-0.318873	-0.294893	-0.73219	-0.741705	-0.978869
Ccnl1	0.495284	-0.91449	0.445119	-0.059502	0.866866	0.170213	0.886348	0.404104	-0.154811	0.298881	1.09088	0.514223	-0.198117	0.078941	0.448899	0.402092	1.4348	0.648991	0.776219	2.13438	1.51964	1.97595	0.784316	0.196185	0.086693	1.41073	0.928627	-0.132273	0.397591	0.444792	-0.058605	0.242463	-1.1847	-0.964325	-1.0612	-0.860779	-0.824124	-0.008266	-0.841099	-1.26081	0.621385	0.127778	-0.049214	-1.93749	-1.64875	-0.758003	-1.42891	-1.24178	-2.18026
Cldn1	0.822355	-0.135421	0.025426	-0.357908	1.10101	0.021798	0.339618	0.394775	0.690368	0.43905	-0.139277	0.237922	0.629608	0.254199	0.853081	1.64226	1.55164	1.14241	1.66016	1.62165	1.74864	0.262872	0.901716	0.007404	1.43574	0.78821	0.492965	0.814853	0.643517	0.944139	-1.455	0.778473	-1.35914	-0.571306	-1.2126	-1.14007	-0.606663	-0.274229	-0.52751	-0.734068	-1.09372	-1.32465	-1.32813	-0.849863	-0.928085	-0.90265	-1.14432	-0.27531	-1.87867
Gclc	-0.882376	-0.456098	-0.662167	0.897799	0.119076	1.16646	2.73219	2.63592	2.09023	1.60838	1.33236	-0.16552	-0.097339	0.00683	0.883082	0.296793	0.141383	-0.007515	-0.130765	0.27733	0.014197	-0.32933	-0.484675	1.11021	2.03517	-0.310276	0.179301	0.45707	-0.506521	0.712237	-0.075902	1.41116	-0.640313	-0.7773	-0.878519	-0.628777	-0.480806	-0.291782	-0.668571	-1.01144	-0.19837	-0.497405	-0.944238	-1.75635	-0.332796	-0.338507	-0.847368	-0.921245	-1.21556
D10Wsu102e	-0.178851	-0.158841	-0.198993	0.213192	-0.516495	0.301888	1.288	2.00813	1.63667	1.12263	-0.769682	1.54074	0.236684	0.826403	0.795079	0.745454	0.738577	0.978972	1.19875	0.495051	-0.049792	1.12166	0.109137	1.44754	0.782076	0.953578	0.448809	0.120236	-0.65077	0.34369	-0.220129	-0.092912	-0.506994	-1.1426	-0.28896	-0.962568	0.544943	0.834823	-1.7186	-0.929587	0.033764	-1.26916	-1.39219	-1.4497	-0.483638	-0.825716	-0.708721	-1.14538	-1.90433
[truncated: 11 more columns]
