# Supplementary material for: Paternal nicotine exposure alters hepatic xenobiotic metabolism in offspring
Source: eLife. 2017 Feb 14;6:e24771. doi: 10.7554/eLife.24771 (PMC5340528; doi:10.7554/eLife.24771)
Supplement: Supplementary file 3. — List of peaks exhibiting significantly increased ATAC-Seq signal in NIC hepatocytes, relative to TA hepatocytes. DOI: http://dx.doi.org/10.7554/eLife.24771.021 [file elife-24771-supp3.xlsx]

## Sheet: diffpeaks
#PeakID	chr	start	end	strand	Normalized Tag Count	focus ratio	findPeaks Score	Total Tags	Control Tags (normalized to IP Experiment)	Fold Change vs Control	p-value vs Control	Fold Change vs Local	p-value vs Local	Clonal Fold Change
chr19-1	chr19	37264061	37264231	+	67.3	0.661	375.5	412.5	97.5	4.23	1.3e-123	11.63	1.3e-275	0.63
chr5-2	chr5	135695297	135695467	+	62	0.587	363.5	382	93	4.11	3.61e-111	10.95	5.75e-246	0.62
chr19-2	chr19	58374761	58374931	+	61.9	0.668	349	378	78.7	4.8	6.72e-130	21.31	0	0.59
chr5-3	chr5	9034664	9034834	+	57.2	0.638	336.5	353	66.9	5.28	4.73e-133	21.76	6.81e-321	0.58
chr2-12	chr2	4996483	4996653	+	54.7	0.667	314	334	82.4	4.05	5.18e-96	14.95	7.91e-257	0.67
chr11-9	chr11	4035713	4035883	+	49.1	0.589	287	299.5	73.4	4.08	1.29e-86	7.96	6.22e-158	0.68
chr19-5	chr19	37442763	37442933	+	48.7	0.635	292	298.5	73	4.09	1.5e-86	20.92	7.06e-268	0.66
chr8-5	chr8	93234116	93234286	+	48.3	0.641	293	294.5	68.1	4.32	7.39e-91	16.39	9.65e-238	0.63
chr10-7	chr10	67087570	67087740	+	47.9	0.657	290	292	71.8	4.07	1.61e-84	19.15	1.57e-256	0.64
chr9-12	chr9	121905675	121905845	+	47	0.642	275	289	64.9	4.46	1.91e-92	9.57	3.19e-170	0.65
chr7-26	chr7	126681278	126681448	+	45.3	0.661	257	277	57.9	4.78	2.33e-95	14	2.33e-206	0.74
chr12-10	chr12	75473091	75473261	+	44.7	0.659	271	277	65.3	4.24	3.55e-84	26.94	2e-277	0.66
chr12-9	chr12	76430945	76431115	+	44.6	0.624	272.5	273.5	64.4	4.24	8.24e-83	13.58	1.5e-199	0.69
chr2-22	chr2	163586883	163587053	+	44.5	0.683	267	272	66.5	4.09	2.2e-79	16.44	4.09e-221	0.68
chr1-32	chr1	58144490	58144660	+	44.3	0.664	252	271	58.7	4.61	5.22e-90	29.01	9.72e-283	0.73
chr1-27	chr1	178330052	178330222	+	44.1	0.63	261	269.5	59.6	4.53	2.01e-87	28.9	1.9e-280	0.65
chr3-5	chr3	121174600	121174770	+	43.4	0.627	261.5	266.5	52.6	5.06	9.14e-97	12.94	8.78e-191	0.71
chr19-15	chr19	37262429	37262599	+	42.3	0.677	261	259.5	56.3	4.61	7.16e-86	7.05	6.06e-125	0.65
chr17-28	chr17	26087129	26087299	+	42.2	0.649	258.5	259	63.2	4.1	8.42e-76	13.89	3.35e-192	0.7
chr5-28	chr5	151142539	151142709	+	41.6	0.628	254	254	54.3	4.68	9.22e-86	20.15	1.12e-227	0.71
chr14-24	chr14	36971304	36971474	+	41.1	0.661	245.5	250.5	52.6	4.76	1.07e-85	13.17	7.23e-182	0.67
chr5-43	chr5	144358386	144358556	+	40.6	0.53	239.5	248	59.1	4.19	1.42e-74	11.11	1.82e-161	0.72
chr15-28	chr15	66610831	66611001	+	40.5	0.709	246.5	247	59.1	4.18	5.98e-74	23.25	4.96e-235	0.71
chr6-31	chr6	23144111	23144281	+	40.3	0.654	246	246	59.1	4.16	2.5e-73	16.11	2.99e-198	0.69
chr19-28	chr19	46646266	46646436	+	40.2	0.695	242	246.5	46.5	5.3	1.46e-93	11.9	9.55e-167	0.71
chr3-19	chr3	69556284	69556454	+	39.9	0.599	237	243.5	59.6	4.09	6.32e-71	17.68	1.11e-205	0.72
chr16-19	chr16	38279818	38279988	+	39.9	0.672	245	244	57.1	4.27	6.28e-75	14.58	1.4e-186	0.67
chr2-38	chr2	132657311	132657481	+	39.8	0.603	241	248	46.1	5.38	8.67e-96	15.99	6.8e-196	0.67
chr8-53	chr8	91381669	91381839	+	39.8	0.62	237.5	243	54.7	4.45	7.31e-78	10.56	1.28e-154	0.69
chr6-37	chr6	142472970	142473140	+	39.4	0.633	236.5	240.5	56.7	4.24	5.51e-73	12.3	4.62e-168	0.75
chr6-36	chr6	31148438	31148608	+	39.3	0.638	238.5	242.5	48.9	4.95	2.41e-86	10.38	1.67e-150	0.74
chr19-33	chr19	34819715	34819885	+	39.1	0.611	236	239	50.6	4.73	1.44e-81	21.59	2.72e-221	0.64
chr19-32	chr19	38514747	38514917	+	39.1	0.65	237	240	59.1	4.06	1.23e-69	24.14	4.43e-232	0.69
chr5-48	chr5	147545931	147546101	+	39	0.657	236.5	241.5	40	6.04	5.71e-103	20.92	3.74e-218	0.71
chr3-44	chr3	14755793	14755963	+	38.7	0.774	216.5	236	54.7	4.32	2.32e-73	43	1.11e-287	0.78
chr16-21	chr16	22881536	22881706	+	38.6	0.703	236.5	236	51.8	4.56	1.26e-77	10.76	6.12e-152	0.73
chr7-63	chr7	14522745	14522915	+	38.3	0.661	228.5	234.5	42.8	5.48	9.13e-92	11.25	5e-155	0.73
chr2-64	chr2	68796153	68796323	+	38.3	0.749	221.5	233.5	51	4.58	6.57e-77	32.19	2.52e-255	0.73
chr2-43	chr2	167324315	167324485	+	38.2	0.612	237.5	238	57.1	4.17	3.62e-71	14.91	2.87e-181	0.7
chr8-63	chr8	85488636	85488806	+	38.2	0.561	230	235	53	4.43	4.1e-75	7.23	1.66e-114	0.77
chr18-20	chr18	74958174	74958344	+	38.1	0.665	225	232.5	48.9	4.75	1.76e-79	12.08	6.9e-161	0.72
chr9-49	chr9	78512009	78512179	+	37.8	0.617	224.5	231	42	5.5	3.91e-91	12.03	3.5e-159	0.7
chr1-56	chr1	164526781	164526951	+	37.7	0.607	234.5	234	53	4.41	1.82e-74	17.08	4.76e-189	0.68
chr10-35	chr10	87518672	87518842	+	37.7	0.582	230.5	230	56.7	4.06	8.53e-67	7.63	2.18e-118	0.72
chr9-41	chr9	121903696	121903866	+	37.6	0.653	230.5	233.5	58.3	4	1.82e-66	7.71	1.38e-118	0.72
chr1-63	chr1	130678684	130678854	+	37.4	0.707	232	228.5	55.1	4.15	9.11e-68	23.21	1.12e-218	0.66
chr13-29	chr13	24365321	24365491	+	37.4	0.672	225.5	229.5	51	4.5	2.8e-74	19.49	6.38e-199	0.69
chr3-39	chr3	81990555	81990725	+	37	0.641	220.5	229	49.8	4.6	3.63e-76	16.2	1.54e-182	0.71
chr8-66	chr8	23193786	23193956	+	37	0.612	228.5	226	43.6	5.18	2.05e-84	9.96	9.36e-139	0.67
chr8-67	chr8	85478533	85478703	+	36.8	0.697	228.5	226.5	50.6	4.48	6.14e-73	13.19	4e-163	0.71
chr10-49	chr10	96924279	96924449	+	36.7	0.724	221.5	224	39.2	5.72	1.33e-91	19.83	1.33e-199	0.7
chr18-22	chr18	61858720	61858890	+	36.7	0.634	218.5	224	49.4	4.54	1.71e-73	15.34	3.48e-176	0.7
chr5-72	chr5	121663576	121663746	+	36.6	0.713	217.5	224.5	55.5	4.05	9.13e-65	11.16	1.57e-147	0.72
chr3-32	chr3	130689689	130689859	+	36.5	0.659	224	225	51.4	4.38	4.47e-71	9.27	9.62e-131	0.69
chr12-56	chr12	99234420	99234590	+	36.5	0.63	214.5	222.5	53.8	4.13	9.97e-66	13.34	3.19e-161	0.77
chr14-44	chr14	8036021	8036191	+	36.5	0.666	218.5	223.5	32.6	6.85	1.1e-105	11.06	3.78e-144	0.69
chr1-77	chr1	105925779	105925949	+	36.4	0.677	221	224	54.7	4.1	7.44e-66	19.16	1.65e-194	0.72
chr4-52	chr4	108066647	108066817	+	36.3	0.667	221	221.5	54.7	4.05	5.07e-64	9.48	4.47e-132	0.68
chr6-54	chr6	72115067	72115237	+	36.1	0.61	220	221	50.2	4.4	2.64e-70	16.35	2.33e-179	0.7
chr6-61	chr6	116910696	116910866	+	35.9	0.636	217	219.5	53	4.14	5.5e-65	27.3	5.92e-224	0.72
chr1-80	chr1	34237768	34237938	+	35.8	0.6	220	219	50.2	4.36	5.11e-69	13.09	2.74e-158	0.68
chr2-71	chr2	69386211	69386381	+	35.5	0.65	217.5	216.5	53.8	4.02	4.61e-62	29.66	1.99e-229	0.7
chr17-69	chr17	30618531	30618701	+	35.5	0.64	216.5	221	52.6	4.2	8.63e-67	20.96	1.05e-194	0.73
chr1-126	chr1	190204626	190204796	+	35.4	0.623	203.5	216	43.6	4.95	2.34e-77	18.68	1.96e-184	0.79
chr6-73	chr6	142451527	142451697	+	35.4	0.665	210.5	216	38.3	5.63	3.22e-87	26.22	1.87e-215	0.74
chr15-85	chr15	4727030	4727200	+	35.2	0.722	207.5	215.5	42.4	5.08	8.66e-79	31.76	1.39e-232	0.74
chr3-42	chr3	97611173	97611343	+	35.2	0.639	217.5	214.5	52.6	4.08	1.83e-62	7.6	2.48e-109	0.69
chr1-102	chr1	151128180	151128350	+	35.1	0.663	212	215	52.2	4.12	1.26e-63	10.99	2.87e-139	0.71
chr19-65	chr19	58395908	58396078	+	35.1	0.675	206.5	214.5	49.8	4.31	2.04e-66	14.5	9.78e-163	0.75
chr2-99	chr2	4922446	4922616	+	34.9	0.645	199.5	214	42.4	5.04	4.39e-78	8.03	5.82e-114	0.78
chr15-91	chr15	59653937	59654107	+	34.9	0.695	204	213	45.7	4.66	6.2e-72	6.13	3.33e-90	0.74
chr7-99	chr7	80446420	80446590	+	34.7	0.655	212.5	212.5	46.9	4.53	2.33e-69	22.36	2.12e-200	0.69
chr9-65	chr9	70078180	70078350	+	34.7	0.641	210.5	212	49.4	4.3	9.85e-66	18.17	2.51e-180	0.7
chr12-68	chr12	78206351	78206521	+	34.7	0.708	205.5	212	51.4	4.12	6.93e-63	26.43	6.57e-208	0.75
chr14-49	chr14	41096506	41096676	+	34.7	0.583	212	212	52.6	4.03	3.02e-61	9.52	2.59e-127	0.74
chr7-93	chr7	35168148	35168318	+	34.6	0.606	214.5	211.5	45.3	4.67	3.04e-71	10.53	4.61e-135	0.68
chr5-84	chr5	53992681	53992851	+	34.4	0.665	210	210.5	47.3	4.45	1.95e-67	16.33	2.17e-171	0.73
chr3-66	chr3	40995237	40995407	+	34.3	0.706	204	209.5	49.8	4.21	2.88e-63	18.52	4.62e-177	0.77
chr5-93	chr5	130200763	130200933	+	34.2	0.658	204	209.5	37.9	5.52	8.5e-83	18.51	2.4e-179	0.74
chr1-121	chr1	175608073	175608243	+	34	0.619	205	209	45.7	4.57	2.86e-69	19.68	1.01e-183	0.73
chr3-56	chr3	55114643	55114813	+	34	0.607	211	208	49.4	4.21	3.28e-63	11.06	2.32e-136	0.72
chr19-64	chr19	37867665	37867835	+	33.9	0.678	206.5	207	50.2	4.13	1.83e-61	20.98	3.07e-188	0.74
chr3-70	chr3	97628813	97628983	+	33.4	0.643	202.5	203.5	48.1	4.23	8.63e-62	9.44	2.48e-121	0.71
chr4-80	chr4	11084890	11085060	+	33.3	0.613	203.5	203	46.1	4.4	9.98e-65	16.15	7.92e-164	0.74
chr4-79	chr4	149792198	149792368	+	33.1	0.66	204.5	202	45.7	4.42	1.1e-64	5.58	1.92e-80	0.71
chr16-51	chr16	24223530	24223700	+	33	0.642	199	201.5	40.4	4.99	1.6e-72	9.75	1.9e-122	0.73
chr9-88	chr9	55289876	55290046	+	32.9	0.709	197	201	50.2	4.01	8.47e-58	25.18	4.54e-199	0.77
chr12-78	chr12	71043663	71043833	+	32.9	0.645	199	201.5	37.9	5.31	6.35e-77	14.07	5.02e-151	0.75
chr15-101	chr15	83451750	83451920	+	32.9	0.685	198.5	201.5	49.8	4.05	2.46e-58	13.04	4.16e-145	0.72
chr6-105	chr6	97262389	97262559	+	32.8	0.663	193.5	200	47.7	4.19	1.75e-60	9.76	2.33e-121	0.74
chr10-95	chr10	21444518	21444688	+	32.8	0.589	198.5	201.5	46.1	4.37	1.93e-63	8.25	9.68e-105	0.7
chr19-68	chr19	56627992	56628162	+	32.8	0.58	199.5	200	37.5	5.33	5.82e-77	15.96	8.06e-159	0.74
chr10-81	chr10	94060297	94060467	+	32.7	0.661	203.5	200.5	41.6	4.82	9.26e-70	21.11	1.17e-181	0.73
chr18-42	chr18	62095629	62095799	+	32.7	0.698	192.5	200.5	40	5.02	1.57e-72	19.14	1.82e-175	0.79
chr1-128	chr1	184809566	184809736	+	32.4	0.615	203	199	48.1	4.13	2.67e-59	7.58	4.95e-101	0.67
chr11-156	chr11	117829777	117829947	+	32.3	0.609	197.5	197.5	41.6	4.75	1.02e-67	7.11	1.65e-96	0.76
chr19-71	chr19	23068746	23068916	+	32.3	0.631	197.5	199	46.9	4.24	5.35e-61	13.25	1.79e-143	0.73
chr16-52	chr16	37580096	37580266	+	32.2	0.647	199	198	49.4	4.01	4.72e-57	8.84	3.15e-112	0.72
chr4-109	chr4	149796954	149797124	+	32	0.729	191.5	195.5	44.5	4.4	5.57e-62	5.2	3.43e-73	0.79
chr3-78	chr3	97615239	97615409	+	32	0.706	198	195	39.2	4.98	1.9e-70	8.51	8.01e-109	0.74
chr5-119	chr5	66062323	66062493	+	32	0.599	193	195	45.7	4.27	3.29e-60	13.48	1.79e-142	0.72
chr19-79	chr19	55110484	55110654	+	32	0.621	190.5	195.5	41.2	4.75	5e-67	13.41	8.37e-143	0.73
chr19-78	chr19	46099751	46099921	+	31.8	0.628	190.5	194	33.9	5.73	1.01e-79	12.71	6.46e-138	0.72
chr2-116	chr2	126425366	126425536	+	31.7	0.691	192	193.5	45.7	4.24	5.99e-59	19.88	3.72e-172	0.73
chr10-108	chr10	127959291	127959461	+	31.7	0.63	192.5	193.5	37.9	5.1	3.46e-71	18.93	2.11e-167	0.74
chr8-139	chr8	35088698	35088868	+	31.6	0.611	191.5	193	47.3	4.08	1.03e-56	16.08	1.26e-155	0.73
chr18-60	chr18	61907016	61907186	+	31.6	0.726	183.5	193	46.5	4.15	8.1e-58	6.73	1.29e-90	0.83
chr6-116	chr6	9061724	9061894	+	31.5	0.675	187	192.5	29.4	6.55	4e-88	32.54	1.29e-211	0.78
chr13-65	chr13	55733864	55734034	+	31.5	0.66	192.5	192.5	39.6	4.87	1.13e-67	22.98	1.16e-183	0.75
chr11-170	chr11	100318102	100318272	+	31.5	0.657	193	192.5	46.9	4.1	1.2e-56	7.28	8.93e-96	0.73
chr16-68	chr16	24420710	24420880	+	31.5	0.71	186	192	41.2	4.66	5.24e-65	20.79	5.76e-173	0.77
chr18-51	chr18	56400087	56400257	+	31.4	0.641	187	193.5	40	4.84	1.12e-67	18.75	6.43e-165	0.76
chr15-109	chr15	59078023	59078193	+	31.3	0.654	192	194.5	44.5	4.37	2.45e-61	7.72	8.35e-99	0.75
chr5-133	chr5	115521645	115521815	+	31.1	0.656	189	190.5	46.9	4.06	2.01e-55	11.38	1.33e-127	0.74
chr12-98	chr12	104386984	104387154	+	31.1	0.725	186.5	190	45.7	4.16	4.46e-57	10.99	7.05e-123	0.76
chr1-138	chr1	153065882	153066052	+	31.1	0.621	195.5	190	45.3	4.2	1.22e-57	12.83	5.63e-136	0.76
chr13-77	chr13	32827318	32827488	+	31.1	0.685	186	191	47.7	4	5.9e-55	10.94	7.84e-124	0.78
chr1-173	chr1	162963637	162963807	+	31	0.674	184.5	189.5	46.5	4.08	2.35e-55	18.12	1.75e-162	0.79
chr5-132	chr5	90424686	90424856	+	31	0.638	189	189	44.9	4.21	1.39e-57	17.96	8.92e-162	0.76
chr7-172	chr7	90048867	90049037	+	30.9	0.735	186	189	42.4	4.46	3.93e-61	15.03	4.52e-147	0.74
chr10-123	chr10	85190135	85190305	+	30.8	0.678	186	188.5	42.4	4.44	1.75e-60	13.31	1.37e-136	0.77
chr10-116	chr10	87897450	87897620	+	30.8	0.664	189	188	39.2	4.8	1.31e-65	11.55	1.02e-124	0.72
chr1-187	chr1	170607635	170607805	+	30.7	0.659	180.5	187.5	35.5	5.28	2.44e-71	14.58	3.19e-143	0.8
chr3-101	chr3	52618957	52619127	+	30.7	0.685	185	187.5	46.5	4.03	3.87e-54	8.81	3.69e-106	0.75
chr18-61	chr18	38867658	38867828	+	30.5	0.622	181.5	188	44.5	4.23	1.58e-57	9.81	6.89e-113	0.76
chr15-123	chr15	82796239	82796409	+	30.4	0.62	186	185.5	39.2	4.74	1.43e-63	10.34	3.82e-117	0.76
chr13-78	chr13	60660080	60660250	+	30.3	0.734	186	185	43.2	4.28	2.27e-57	15.93	1.55e-148	0.83
chr1-182	chr1	72809400	72809570	+	30.2	0.633	181.5	185	38.3	4.82	6.53e-65	14.1	1.9e-139	0.74
chr4-125	chr4	53414011	53414181	+	30.2	0.687	185.5	184.5	40.8	4.52	2.44e-60	19.41	1.5e-162	0.72
chr9-127	chr9	24420244	24420414	+	30.2	0.674	183	184	44.9	4.1	1.76e-54	17.5	1.37e-155	0.73
chr10-140	chr10	88515174	88515344	+	30.1	0.709	182.5	183.5	45.3	4.05	2.53e-53	20.29	6.75e-166	0.77
chr10-130	chr10	95779925	95780095	+	30	0.564	184.5	183	45.3	4.04	2.53e-53	9.66	3.08e-111	0.72
chr17-107	chr17	49349486	49349656	+	30	0.653	185	183	34.7	5.28	5.83e-70	20.95	2.41e-168	0.71
chr16-80	chr16	38287435	38287605	+	29.8	0.617	178.5	182	42.4	4.29	1.24e-56	4.47	1.04e-58	0.8
chr2-136	chr2	122238069	122238239	+	29.7	0.687	182.5	181	42.4	4.27	5.31e-56	6.89	1.29e-84	0.74
chr4-139	chr4	135238765	135238935	+	29.7	0.673	182	183	44.5	4.12	2.04e-54	15.65	4.52e-144	0.73
chr2-151	chr2	71254921	71255091	+	29.6	0.66	177	181.5	40.4	4.49	5.39e-59	13.58	1.59e-133	0.81
chr2-134	chr2	18093943	18094113	+	29.4	0.787	183	179.5	37.5	4.78	3.67e-62	32.86	3.9e-198	0.75
chr2-133	chr2	155101889	155102059	+	29.4	0.677	183.5	184	38.8	4.75	1.48e-63	13.04	7.52e-130	0.78
chr4-131	chr4	96665112	96665282	+	29.3	0.721	183.5	179	44.5	4.03	5.7e-52	17.98	1.4e-152	0.76
chr5-162	chr5	140191623	140191793	+	29.3	0.644	181	178.5	33.4	5.34	1.28e-68	15.36	2.32e-139	0.76
chr7-181	chr7	92821209	92821379	+	29.3	0.702	183.5	178.5	40.8	4.38	1.91e-56	15.03	9.69e-135	0.77
chr1-196	chr1	191641477	191641647	+	29.2	0.666	178	178	44.1	4.04	6.68e-52	11.08	5.49e-117	0.71
chr6-141	chr6	37782024	37782194	+	29.2	0.722	177	178	41.6	4.28	2.89e-55	17.78	9.47e-152	0.77
chr10-144	chr10	59943691	59943861	+	29.2	0.641	180.5	179.5	44.9	4	1.95e-51	15.08	7.9e-139	0.77
chr9-153	chr9	106724993	106725163	+	29.1	0.706	175.5	177.5	40	4.44	5.26e-57	20.81	2.27e-162	0.77
chr16-84	chr16	93725492	93725662	+	29.1	0.616	177	178.5	36.3	4.92	1.62e-63	7.87	1.23e-93	0.75
chr19-108	chr19	32637458	32637628	+	29.1	0.657	176.5	177.5	35.5	5	3.19e-64	20.37	1e-159	0.73
chr2-161	chr2	155080176	155080346	+	29	0.63	174	179	29	6.18	1.31e-78	6.86	1.5e-84	0.77
chr2-131	chr2	166116061	166116231	+	29	0.622	184	178	38.3	4.64	3.58e-60	12.67	1.33e-126	0.73
chr15-138	chr15	59772713	59772883	+	29	0.588	178.5	178	40.8	4.36	1.91e-56	16.06	9.57e-143	0.74
chr17-134	chr17	84689449	84689619	+	29	0.696	172	178.5	33.9	5.27	7.39e-68	10	7.93e-109	0.78
chr1-215	chr1	183378583	183378753	+	28.9	0.663	170.5	176.5	42.8	4.12	2.58e-52	18.42	8.74e-152	0.83
chr4-163	chr4	7196688	7196858	+	28.9	0.732	175	176.5	30.2	5.85	1.32e-73	21.65	3.17e-163	0.79
chr13-90	chr13	91765661	91765831	+	28.9	0.684	179	177	35.5	4.99	3.19e-64	18.16	1.31e-151	0.75
chr2-152	chr2	10126228	10126398	+	28.8	0.704	175	176	38.8	4.54	3.31e-58	9.32	1.31e-104	0.75
chr17-124	chr17	12937633	12937803	+	28.8	0.62	175.5	176.5	37.1	4.75	8.61e-61	9.9	1.04e-108	0.77
chr10-165	chr10	83310490	83310660	+	28.6	0.69	175.5	178.5	43.6	4.09	1.91e-52	20.62	8.61e-159	0.77
chr8-168	chr8	45329344	45329514	+	28.4	0.619	177	175.5	36.3	4.83	1.88e-61	8.67	5e-98	0.77
chr4-162	chr4	80922184	80922354	+	28.3	0.659	176	174.5	35.9	4.86	1.91e-61	13.5	2.94e-127	0.76
chr13-96	chr13	114060342	114060512	+	28.3	0.708	178	174.5	41.6	4.19	9.43e-53	16.44	3.51e-141	0.74
chr15-151	chr15	82422966	82423136	+	28.3	0.674	173	172.5	38.3	4.5	3.32e-56	10.93	8.54e-113	0.73
chr2-164	chr2	77518846	77519016	+	28.2	0.669	173.5	173.5	41.6	4.17	3.95e-52	9.14	3.49e-100	0.76
chr15-156	chr15	3464893	3465063	+	28.2	0.643	171.5	172.5	40	4.32	8.53e-54	19.58	1.2e-152	0.73
chr18-73	chr18	84906387	84906557	+	28.2	0.655	172	172.5	39.2	4.41	5.53e-55	6.31	1.82e-76	0.72
chr14-115	chr14	65773301	65773471	+	28	0.711	171	172	42.4	4.05	2.07e-50	26.71	1.06e-174	0.83
chr4-161	chr4	43394479	43394649	+	27.9	0.58	176	171	35.9	4.76	2.14e-59	7.98	6.42e-91	0.77
chr4-175	chr4	132946601	132946771	+	27.9	0.61	172	170.5	42.4	4.02	3.39e-49	10	1.54e-104	0.74
chr8-200	chr8	109973003	109973173	+	27.9	0.655	167.5	170	41.6	4.09	2.81e-50	16.3	5.54e-139	0.79
chr5-183	chr5	32056359	32056529	+	27.7	0.671	175	172	34.7	4.96	3.86e-62	21.43	3.05e-154	0.81
chr10-191	chr10	121490053	121490223	+	27.5	0.668	168.5	170	33.4	5.08	7.1e-63	6.32	1.15e-74	0.78
chr18-91	chr18	56392801	56392971	+	27.5	0.758	165.5	167.5	35.5	4.72	2.38e-57	25.13	3.05e-164	0.78
chr3-162	chr3	88141985	88142155	+	27.4	0.616	165.5	167	40	4.18	1.2e-50	7.8	6.54e-88	0.81
chr11-273	chr11	116195475	116195645	+	27.4	0.637	167.5	167	41.6	4.01	1.89e-48	5.06	1.52e-61	0.73
chr4-201	chr4	46952637	46952807	+	27.3	0.669	167	166.5	28.1	5.92	3.19e-70	17.57	3.5e-139	0.79
chr5-206	chr5	150578585	150578755	+	27.3	0.712	166.5	166.5	31.8	5.23	5.76e-63	12.76	3.94e-119	0.83
chr2-187	chr2	103208267	103208437	+	27.2	0.563	169.5	166	26.9	6.17	6.72e-73	10.54	9.44e-107	0.79
chr4-177	chr4	35089414	35089584	+	27.2	0.718	171.5	166	34.7	4.79	5.31e-58	15.34	1.16e-131	0.78
chr10-183	chr10	127776112	127776282	+	27.2	0.657	171	170	37.5	4.53	3.87e-56	25.16	1.63e-164	0.76
chr15-195	chr15	52378214	52378384	+	27.2	0.716	162	166	39.6	4.2	1.37e-50	28.44	9.11e-173	0.86
chr1-220	chr1	136633014	136633184	+	27.1	0.701	168	165.5	34.3	4.83	5.42e-58	16.84	7.04e-134	0.8
chr2-209	chr2	132682710	132682880	+	27.1	0.642	165	167	22.4	7.44	5.57e-85	10.19	6.81e-104	0.79
chr5-221	chr5	92607850	92608020	+	27.1	0.673	164	165.5	28.1	5.88	1.89e-69	13.32	2.79e-121	0.75
chr1-231	chr1	23163565	23163735	+	27	0.688	165.5	165.5	38.8	4.27	4.15e-51	27.21	6.8e-169	0.79
chr4-202	chr4	108116577	108116747	+	27	0.682	167	165.5	41.2	4.02	8.97e-48	7.83	3.53e-87	0.79
chr5-212	chr5	140118124	140118294	+	27	0.712	165.5	165	32.6	5.06	8.73e-61	9.26	5.09e-96	0.78
chr18-88	chr18	38780009	38780179	+	27	0.645	166	165	37.1	4.45	1.73e-53	8.13	6.73e-88	0.78
chr1-227	chr1	160785813	160785983	+	27	0.699	166.5	165	34.7	4.76	2.55e-57	19.58	2.91e-146	0.77
chr10-208	chr10	111819958	111820128	+	27	0.619	165	166	37.1	4.47	3.87e-54	17.75	7.1e-140	0.76
chr6-187	chr6	134555264	134555434	+	26.9	0.7	162.5	165.5	33	5.01	4.52e-60	14.43	2.96e-125	0.81
chr15-203	chr15	97272531	97272701	+	26.9	0.641	160.5	164.5	32.2	5.1	8.42e-61	11.45	1.16e-108	0.75
chr5-234	chr5	123223150	123223320	+	26.8	0.71	161.5	166.5	39.6	4.21	1.37e-50	10.69	2.4e-102	0.79
chr12-135	chr12	32765953	32766123	+	26.8	0.666	161.5	163.5	37.1	4.4	3.42e-52	7.57	7.36e-84	0.85
chr13-127	chr13	69638281	69638451	+	26.7	0.684	166	163	33	4.93	1.12e-58	9.53	2.01e-98	0.75
chr19-134	chr19	36645439	36645609	+	26.7	0.696	164	163	35.1	4.65	2.58e-55	19.42	3.6e-144	0.77
chr1-243	chr1	121334153	121334323	+	26.6	0.713	163.5	164.5	39.6	4.16	2.4e-49	6.73	8.64e-76	0.79
chr4-205	chr4	43391712	43391882	+	26.5	0.636	165	162	36.3	4.46	9.23e-53	7.66	1.02e-83	0.75
chr5-260	chr5	87196482	87196652	+	26.4	0.681	155.5	161.5	32.2	5.01	1.09e-58	31.97	9.77e-177	0.79
chr13-140	chr13	93711332	93711502	+	26.4	0.685	162.5	161	39.6	4.07	1.69e-47	15.4	5.31e-128	0.78
chr1-258	chr1	4801681	4801851	+	26.3	0.676	160	160.5	39.6	4.06	6.89e-47	27.29	7.82e-165	0.78
chr4-268	chr4	97814613	97814783	+	26.3	0.811	151	160.5	37.9	4.23	4.12e-49	14.6	1.5e-123	0.89
chr9-186	chr9	42275870	42276040	+	26.3	0.672	165	161	40	4.03	5.88e-47	5.64	3.44e-64	0.74
chr4-230	chr4	76361799	76361969	+	26.1	0.669	159.5	160	32.2	4.97	5.48e-58	22.96	1.45e-152	0.79
chr8-218	chr8	46376138	46376308	+	26.1	0.743	162.5	160	25.7	6.23	6.7e-71	27.87	3.41e-165	0.81
chr8-245	chr8	45265013	45265183	+	26.1	0.698	155.5	160.5	35.9	4.47	4.5e-52	9.12	2.43e-93	0.81
chr8-229	chr8	10857395	10857565	+	26	0.613	158	158.5	25.7	6.17	2.59e-69	8.23	1.51e-86	0.75
chr19-130	chr19	4588561	4588731	+	26	0.684	165	159	33	4.81	6.46e-56	14.11	7.03e-120	0.77
chr8-212	chr8	95424761	95424931	+	25.9	0.659	165	165	33.9	4.87	1.13e-58	12.01	7.26e-110	0.77
chr9-213	chr9	61813400	61813570	+	25.9	0.687	158.5	158	33.9	4.67	6.54e-54	8.65	9.14e-89	0.82
chr8-228	chr8	123043992	123044162	+	25.8	0.665	158.5	158	37.5	4.21	1.99e-48	6.65	8.51e-73	0.79
chr14-175	chr14	12104983	12105153	+	25.8	0.608	150.5	161	33.9	4.76	6.16e-56	8.59	1.64e-84	0.82
chr17-170	chr17	64743731	64743901	+	25.8	0.62	160.5	158.5	39.2	4.05	3.28e-46	5.58	2.37e-63	0.79
chr10-224	chr10	77103786	77103956	+	25.7	0.719	160.5	157	36.7	4.28	5.97e-49	15.14	7.85e-123	0.8
chr14-164	chr14	21052256	21052426	+	25.6	0.574	155	156.5	35.5	4.41	4.35e-50	6.05	2.43e-67	0.77
chr14-152	chr14	78852972	78853142	+	25.6	0.714	158.5	158	38.8	4.08	9.39e-47	6.81	2.29e-71	0.79
chr19-141	chr19	41348322	41348492	+	25.6	0.658	158	156.5	34.7	4.51	2.59e-51	7.2	1.48e-77	0.78
chr6-209	chr6	55183195	55183365	+	25.6	0.669	156.5	156.5	37.1	4.22	9.57e-48	13.14	4.37e-114	0.78
chr10-258	chr10	87915878	87916048	+	25.6	0.69	153.5	156.5	33	4.74	7.1e-54	21.54	1.9e-144	0.81
chr18-102	chr18	9784870	9785040	+	25.6	0.727	161.5	161.5	40	4.04	5.88e-47	13.02	1.54e-113	0.79
chr11-355	chr11	16744929	16745099	+	25.5	0.649	152.5	155.5	34.7	4.48	1.17e-50	8.65	5.21e-86	0.83
chr12-164	chr12	103905046	103905216	+	25.5	0.657	152	156	37.9	4.11	1.27e-46	11.43	1.49e-104	0.83
chr13-149	chr13	81335393	81335563	+	25.5	0.729	159	155.5	36.3	4.28	2.89e-48	22.53	1.53e-147	0.73
chr14-131	chr14	115052631	115052801	+	25.5	0.702	166.5	156	35.5	4.4	4.35e-50	25	4.67e-154	0.81
chr16-121	chr16	37567363	37567533	+	25.5	0.608	159	155.5	25.3	6.15	7.43e-68	12.03	5.35e-107	0.76
chr18-126	chr18	65226180	65226350	+	25.4	0.657	154	155	36.3	4.27	2.89e-48	7.63	8.77e-80	0.79
chr6-201	chr6	113076160	113076330	+	25.3	0.57	158.5	156.5	33.9	4.62	1.42e-52	5.92	1.82e-65	0.78
chr9-211	chr9	65235695	65235865	+	25.3	0.686	159	156.5	34.3	4.57	6.13e-52	8.05	6.29e-83	0.77
chr13-158	chr13	112055184	112055354	+	25.3	0.664	155.5	155.5	35.5	4.38	1.91e-49	12.01	6.48e-107	0.78
chr19-161	chr19	32532362	32532532	+	25.3	0.651	152	154.5	30.6	5.05	1.27e-56	13.33	2.3e-113	0.81
chr2-232	chr2	63861988	63862158	+	25.2	0.681	159	154.5	35.5	4.35	8.38e-49	22.67	4.69e-146	0.81
chr17-206	chr17	64741201	64741371	+	25.2	0.672	151.5	154	31.4	4.9	3.26e-55	8.23	2.2e-84	0.81
chr1-283	chr1	71634601	71634771	+	25.2	0.628	155	157.5	37.5	4.2	8.38e-48	12.68	4.73e-109	0.81
chr6-236	chr6	134664578	134664748	+	25.2	0.635	152	153.5	26.5	5.79	1.14e-63	17.46	1.5e-128	0.8
chr12-160	chr12	103773613	103773783	+	25.2	0.661	152.5	153.5	37.9	4.05	8.69e-45	13.56	1.09e-113	0.8
chr19-166	chr19	44021663	44021833	+	25.2	0.74	151	153.5	37.9	4.05	8.69e-45	20.28	8.24e-139	0.81
chr5-275	chr5	89450964	89451134	+	25.1	0.655	153.5	154	33.4	4.6	6.96e-52	9.59	7.14e-93	0.77
chr7-275	chr7	3230457	3230627	+	25	0.706	160	152.5	32.6	4.67	7.75e-52	13.51	6.18e-113	0.81
chr11-381	chr11	16804022	16804192	+	25	0.636	149	152.5	32.2	4.73	1.72e-52	9.5	1.65e-90	0.81
chr15-232	chr15	25945343	25945513	+	25	0.611	152	152.5	32.6	4.67	7.75e-52	7.61	1.44e-78	0.75
chr5-274	chr5	86926473	86926643	+	24.9	0.615	153.5	152	31.4	4.84	7.82e-54	18.05	7.95e-131	0.78
chr5-269	chr5	146018359	146018529	+	24.9	0.709	154.5	153	35.9	4.26	1.4e-47	16.08	3e-121	0.78
chr10-259	chr10	93515996	93516166	+	24.9	0.69	153.5	152	35.5	4.28	1.57e-47	9.71	4.95e-93	0.85
chr18-130	chr18	84916276	84916446	+	24.9	0.684	152.5	152	24.5	6.21	2.59e-67	15.86	9.04e-123	0.82
chr13-152	chr13	54077186	54077356	+	24.8	0.649	157.5	153.5	38.3	4	2.98e-44	8.15	1.63e-81	0.81
chr9-230	chr9	69306803	69306973	+	24.7	0.631	154	153	37.1	4.12	7.01e-46	9.98	5.23e-91	0.76
chr15-233	chr15	77244217	77244387	+	24.7	0.708	152	151	26.1	5.78	5.45e-63	17.06	5.62e-123	0.83
chr15-221	chr15	82763747	82763917	+	24.7	0.634	155	152	37.5	4.05	1.02e-44	13.27	4.19e-111	0.76
chr2-273	chr2	122771104	122771274	+	24.6	0.706	152.5	150	35.9	4.18	1.07e-45	23.37	3.99e-145	0.83
chr13-182	chr13	32764507	32764677	+	24.6	0.669	148.5	150	28.1	5.33	3.32e-58	18.36	3.45e-130	0.84
chr16-140	chr16	70328669	70328839	+	24.6	0.771	150.5	150	33	4.54	7.21e-50	16.87	5.55e-125	0.82
chr3-223	chr3	98045064	98045234	+	24.5	0.658	149.5	151	36.7	4.11	3.35e-45	13.16	5.94e-109	0.78
chr8-293	chr8	109584412	109584582	+	24.5	0.628	147	150	34.3	4.38	5.01e-48	6.36	3.85e-67	0.8
chr13-166	chr13	111431250	111431420	+	24.5	0.675	153	150.5	33.4	4.5	3.03e-49	23.79	2.75e-145	0.74
chr1-315	chr1	133278689	133278859	+	24.4	0.719	148.5	149	33	4.51	3.28e-49	14.82	2.77e-116	0.79
chr4-309	chr4	108024865	108025035	+	24.4	0.712	145	149	34.3	4.35	2.2e-47	11.78	1.08e-101	0.8
chr4-264	chr4	149989212	149989382	+	24.4	0.591	153	149	31.4	4.74	8.73e-52	7.79	7.44e-77	0.77
chr13-181	chr13	24353132	24353302	+	24.4	0.716	148.5	152.5	37.5	4.06	1.02e-44	9.72	2.85e-89	0.8
chr2-283	chr2	126549775	126549945	+	24.3	0.68	151	149	19.6	7.61	2.85e-77	6.11	1.57e-64	0.76
chr6-233	chr6	67437919	67438089	+	24.3	0.703	152	148.5	31	4.79	8.98e-52	20.65	1.25e-135	0.83
chr11-374	chr11	119945468	119945638	+	24.3	0.675	150	152	31.4	4.84	7.82e-54	5.67	3.91e-60	0.8
chr16-131	chr16	22951000	22951170	+	24.3	0.615	155	149	34.7	4.3	8.56e-47	9.8	2.51e-90	0.73
chr5-268	chr5	145900641	145900811	+	24.3	0.658	154.5	148.5	24.5	6.07	3.72e-64	10.72	6.91e-95	0.8
chr12-172	chr12	54696612	54696782	+	24.3	0.543	149.5	149	20.4	7.31	5.56e-75	7.98	9.73e-79	0.95
chr15-238	chr15	82457745	82457915	+	24.3	0.613	151.5	153	20	7.65	1.24e-79	6	3.87e-63	0.82
chr19-171	chr19	56535121	56535291	+	24.3	0.695	148.5	148	30.2	4.9	3.9e-53	12.42	5.34e-105	0.79
chr3-241	chr3	28682087	28682257	+	24.2	0.661	146	148	35.5	4.17	5.13e-45	20.67	2.41e-127	0.8
chr5-306	chr5	150599363	150599533	+	24.2	0.665	149.5	148	33	4.48	1.48e-48	7.75	4.15e-77	0.83
chr7-352	chr7	25658751	25658921	+	24.2	0.635	145.5	147.5	31	4.76	4.3e-51	6.62	2.17e-68	0.89
chr5-318	chr5	124605228	124605398	+	24.1	0.648	147	148	35.9	4.12	1.86e-44	12.59	2.07e-104	0.79
chr1-320	chr1	183387445	183387615	+	24	0.659	147.5	150.5	36.7	4.1	1.38e-44	10.55	3.69e-94	0.79
chr3-225	chr3	60167713	60167883	+	24	0.716	149	148	20	7.4	3.07e-75	13.26	3.03e-107	0.82
chr9-277	chr9	96824245	96824415	+	24	0.661	145	147	33.9	4.34	1.07e-46	20.36	8.79e-133	0.86
chr18-148	chr18	46604363	46604533	+	24	0.636	146.5	146.5	30.2	4.85	9.34e-52	6.78	1.64e-68	0.76
chr18-139	chr18	61373943	61374113	+	24	0.587	149	149	35.9	4.15	4.47e-45	15.44	2.01e-116	0.84
chr6-248	chr6	121838368	121838538	+	23.9	0.704	149	150	30.6	4.9	7.91e-54	12.21	6.16e-102	0.86
chr10-257	chr10	18066147	18066317	+	23.9	0.624	153.5	150	29.8	5.04	3.08e-55	14.84	4.5e-114	0.79
chr10-286	chr10	99555881	99556051	+	23.9	0.611	147	146	33.9	4.31	4.65e-46	15.36	4.26e-116	0.77
chr11-397	chr11	94347292	94347462	+	23.9	0.615	146.5	146	31.4	4.65	9.19e-50	13.72	1.85e-109	0.78
chr1-342	chr1	97771157	97771327	+	23.8	0.712	144	147	35.5	4.14	2.14e-44	8.55	4.17e-81	0.81
chr4-287	chr4	99048708	99048878	+	23.8	0.732	148.5	147	34.3	4.29	4.15e-46	17.47	6.73e-122	0.81
chr5-289	chr5	76955629	76955799	+	23.8	0.713	151.5	145.5	29	5.02	3.77e-53	6.09	4.09e-63	0.76
chr7-332	chr7	99974340	99974510	+	23.8	0.652	151.5	145.5	33.9	4.3	2.01e-45	6.89	1.24e-69	0.77
chr3-273	chr3	131493325	131493495	+	23.8	0.672	138	145.5	31	4.69	9.63e-50	6.2	1.45e-63	0.87
chr17-221	chr17	81385610	81385780	+	23.8	0.772	149	147	35.1	4.19	5.87e-45	26.8	1.21e-148	0.85
chr2-309	chr2	59997002	59997172	+	23.6	0.679	147	144.5	31.4	4.6	1.98e-48	16.69	2.06e-119	0.83
chr15-281	chr15	81882384	81882554	+	23.6	0.697	138.5	145	33	4.39	1.31e-46	14.45	1.7e-108	0.85
chr4-331	chr4	130630551	130630721	+	23.5	0.642	142.5	143.5	30.6	4.69	4.73e-49	21.23	1.49e-132	0.81
chr5-331	chr5	115014615	115014785	+	23.5	0.623	145	144	35.5	4.06	1.5e-42	11.65	1.12e-97	0.75
chr6-250	chr6	31262275	31262445	+	23.5	0.725	148.5	145.5	36.3	4.01	4.41e-42	14.7	3.09e-111	0.81
chr13-212	chr13	104641166	104641336	+	23.5	0.646	140.5	143.5	34.7	4.14	4.93e-43	11.33	4.25e-96	0.83
chr9-288	chr9	65306820	65306990	+	23.4	0.712	143	144	32.6	4.41	1.44e-46	14.24	6.81e-108	0.82
chr10-311	chr10	40007126	40007296	+	23.4	0.67	143.5	143.5	35.1	4.09	1.75e-42	18.96	3.26e-125	0.76
chr18-153	chr18	75180197	75180367	+	23.4	0.696	145	144	25.7	5.6	1.61e-58	20.43	1.37e-129	0.83
chr1-347	chr1	172652322	172652492	+	23.4	0.599	143.5	142.5	31	4.6	9.71e-48	10.95	1.03e-93	0.75
chr8-274	chr8	5105295	5105465	+	23.4	0.733	150.5	142.5	31	4.6	9.71e-48	14.67	4.04e-110	0.8
chr9-281	chr9	111148094	111148264	+	23.4	0.766	144	142.5	26.1	5.46	3.14e-56	14.37	3.76e-109	0.82
chr13-196	chr13	113601910	113602080	+	23.4	0.728	145	144	34.7	4.15	1.18e-43	8.45	3.23e-79	0.83
chr18-137	chr18	51224746	51224916	+	23.4	0.688	150.5	150.5	33.9	4.45	1.25e-48	26.63	3.11e-145	0.81
chr2-313	chr2	57127591	57127761	+	23.3	0.674	145.5	142	33	4.3	1.09e-44	13.75	1.24e-106	0.78
chr14-194	chr14	122719914	122720084	+	23.3	0.628	143.5	142.5	35.1	4.06	7.16e-42	21.37	3.21e-132	0.8
chr17-237	chr17	27821778	27821948	+	23.3	0.696	144	143.5	35.1	4.09	1.75e-42	5.61	3.13e-57	0.79
chr4-311	chr4	101428393	101428563	+	23.2	0.623	144.5	143.5	27.7	5.17	6.6e-54	12.67	1.46e-100	0.8
chr5-338	chr5	88690873	88691043	+	23.2	0.683	143.5	143	33	4.33	2.52e-45	11.95	5.61e-98	0.82
chr6-290	chr6	67170155	67170325	+	23	0.596	141.5	141	33	4.27	4.71e-44	18.63	2.18e-121	0.77
chr2-337	chr2	35103681	35103851	+	22.9	0.723	141.5	140	33.4	4.19	7.49e-43	7.83	3.23e-74	0.81
chr6-348	chr6	113144951	113145121	+	22.9	0.713	132	140	30.6	4.58	4.76e-47	24.48	4.01e-137	0.9
chr10-332	chr10	118765996	118766166	+	22.9	0.638	140	140	33.9	4.14	2.73e-42	15.36	2.07e-111	0.76
chr13-214	chr13	114466569	114466739	+	22.9	0.65	140	140	25.7	5.45	1.53e-55	10.12	1.8e-87	0.77
chr2-367	chr2	166153436	166153606	+	22.9	0.646	137	139.5	33	4.22	8.55e-43	10.42	1.43e-86	0.8
chr5-342	chr5	8904599	8904769	+	22.9	0.728	142.5	142.5	29.4	4.85	2.27e-50	14.23	1.41e-105	0.78
chr8-319	chr8	45262011	45262181	+	22.9	0.714	141	139.5	25.3	5.52	1.35e-55	10.48	3.44e-89	0.81
chr10-322	chr10	53382775	53382945	+	22.9	0.646	141.5	140.5	24.5	5.74	5.55e-58	9.53	5.21e-84	0.81
chr16-182	chr16	37579650	37579820	+	22.9	0.573	139.5	139.5	29.8	4.68	1.14e-47	6.29	7.47e-61	0.79
chr4-372	chr4	82471016	82471186	+	22.8	0.719	137.5	139	30.6	4.54	2.18e-46	18.45	4.67e-121	0.82
chr5-377	chr5	9046086	9046256	+	22.8	0.645	137.5	139	32.2	4.31	5.94e-44	12.86	1.18e-100	0.84
chr5-359	chr5	63828923	63829093	+	22.8	0.735	139	139	32.2	4.31	5.94e-44	19.42	2.36e-121	0.78
chr10-357	chr10	40069396	40069566	+	22.8	0.662	136	139.5	22	6.33	1.57e-62	15.5	2.29e-109	0.82
chr12-201	chr12	54696985	54697155	+	22.8	0.515	142.5	139	32.2	4.31	5.94e-44	7.44	2.27e-70	0.79
chr3-271	chr3	138262682	138262852	+	22.7	0.68	138.5	138.5	33	4.19	3.6e-42	9.12	3e-81	0.81
chr6-299	chr6	142459419	142459589	+	22.7	0.684	139.5	140.5	34.3	4.1	9.74e-42	19.98	1.01e-124	0.84
chr9-268	chr9	43263237	43263407	+	22.7	0.632	146	138.5	30.2	4.59	2.34e-46	5.44	1.72e-54	0.77
chr11-454	chr11	101682666	101682836	+	22.7	0.679	139	138.5	28.1	4.92	1.13e-49	14.41	2.78e-106	0.83
chr11-463	chr11	104407409	104407579	+	22.7	0.734	138	138.5	24.9	5.57	1.18e-55	25.38	1.96e-138	0.85
chr13-229	chr13	40855319	40855489	+	22.7	0.694	135.5	138.5	33.4	4.14	1.31e-41	5.83	1.4e-57	0.83
chr4-370	chr4	49437085	49437255	+	22.6	0.727	137.5	138.5	22.8	6.06	6.68e-60	22.11	1.05e-124	0.83
chr8-338	chr8	23191854	23192024	+	22.6	0.66	138.5	138.5	30.2	4.59	2.34e-46	5.94	4.94e-59	0.82
chr13-217	chr13	60668143	60668313	+	22.5	0.641	139.5	138	32.2	4.28	2.57e-43	10.75	2.61e-89	0.77
chr17-265	chr17	24821763	24821933	+	22.5	0.699	137	137	29	4.73	1.24e-47	12.97	9.81e-100	0.81
chr4-338	chr4	96622696	96622866	+	22.4	0.653	141.5	136.5	31	4.4	8.15e-44	19.04	4.78e-120	0.8
chr8-350	chr8	31149964	31150134	+	22.4	0.558	136.5	138	26.1	5.29	2.65e-53	10.22	6.22e-86	0.94
chr5-391	chr5	144371035	144371205	+	22.3	0.611	136	137	26.5	5.17	7.83e-52	7.03	5.26e-66	0.77
chr11-476	chr11	90259286	90259456	+	22.3	0.643	135.5	136	32.6	4.17	1.73e-41	13.2	5.49e-100	0.79
chr11-484	chr11	120423193	120423363	+	22.3	0.674	134.5	138	31	4.45	4.13e-45	12.57	1.39e-96	0.79
chr14-212	chr14	59206149	59206319	+	22.3	0.703	137.5	137.5	25.7	5.35	2.43e-53	13.55	2.17e-101	0.81
chr3-291	chr3	138260821	138260991	+	22.2	0.71	133.5	136	33.4	4.07	2.22e-40	8.41	4.12e-75	0.85
chr6-329	chr6	8864039	8864209	+	22.2	0.626	134.5	139	29.8	4.67	1.14e-47	16.61	1.34e-111	0.84
chr7-404	chr7	80453213	80453383	+	22.2	0.63	137	137	27.7	4.94	1.13e-49	6.14	1.82e-59	0.78
chr12-216	chr12	99207161	99207331	+	22.2	0.652	139	136.5	33	4.13	6.27e-41	13.56	5.62e-100	0.82
chr16-195	chr16	22891235	22891405	+	22.2	0.665	134.5	135.5	33.4	4.05	9.05e-40	4.28	2.17e-42	0.81
chr19-236	chr19	55166854	55167024	+	22.2	0.681	133	136	31	4.39	8.15e-44	11.14	6.3e-90	0.82
chr1-390	chr1	136959608	136959778	+	22.1	0.74	135	135	33	4.09	2.59e-40	6.91	2.44e-64	0.85
chr15-311	chr15	36279897	36280067	+	22.1	0.723	132	135	31.8	4.24	5.33e-42	10.75	3.35e-88	0.88
chr18-166	chr18	12550284	12550454	+	22.1	0.665	139.5	136.5	24.9	5.49	3.62e-54	12.98	1.97e-97	0.79
chr19-212	chr19	34748173	34748343	+	22.1	0.629	138.5	135.5	32.6	4.15	7.24e-41	10.43	9.16e-86	0.79
chr6-332	chr6	54124642	54124812	+	22	0.72	134.5	135	33.4	4.04	9.05e-40	21.96	3.33e-126	0.9
chr10-335	chr10	128971008	128971178	+	22	0.706	140	134.5	29.8	4.52	2.38e-44	13.58	7.8e-100	0.79
chr16-196	chr16	93730014	93730184	+	22	0.608	134.5	134.5	30.2	4.46	9.85e-44	5.57	5.74e-53	0.81
chr17-267	chr17	5132502	5132672	+	22	0.69	136.5	135.5	27.7	4.89	2.74e-48	16.66	5.76e-111	0.78
chr3-290	chr3	98246019	98246189	+	22	0.717	133.5	134	30.6	4.38	3.97e-43	6.76	2.66e-63	0.81
chr3-287	chr3	121258784	121258954	+	22	0.598	134.5	134	29.8	4.5	2.38e-44	6.7	2.49e-63	0.83
chr5-358	chr5	9102850	9103020	+	22	0.641	139	134.5	29.8	4.52	2.38e-44	6.76	2.66e-63	0.82
chr11-437	chr11	89007727	89007897	+	22	0.705	141	138.5	29.8	4.65	5.35e-47	8.87	1.52e-77	0.81
chr12-223	chr12	55426455	55426625	+	22	0.7	136.5	136	25.7	5.29	1.3e-52	13.4	2.02e-98	0.85
chr5-385	chr5	138012473	138012643	+	21.9	0.723	137	133.5	32.6	4.09	1.24e-39	14.18	1.18e-101	0.8
chr8-386	chr8	35213598	35213768	+	21.9	0.768	131	133.5	31.4	4.25	2.57e-41	4.09	1.19e-39	0.9
chr3-280	chr3	52653129	52653299	+	21.7	0.722	136	133.5	29.8	4.48	1.07e-43	13.09	2.01e-96	0.78
chr4-396	chr4	108077666	108077836	+	21.7	0.662	133	132.5	29.4	4.51	1.17e-43	7.57	2e-68	0.78
chr5-438	chr5	43217651	43217821	+	21.7	0.707	130.5	133.5	26.1	5.11	1.02e-49	20.35	2.85e-119	0.84
chr15-305	chr15	3491027	3491197	+	21.7	0.671	133	132.5	30.2	4.39	1.93e-42	10.95	1.96e-86	0.82
chr16-205	chr16	55816533	55816703	+	21.7	0.676	132.5	138.5	33	4.19	3.6e-42	11.87	4.01e-90	0.84
chr19-251	chr19	10122346	10122516	+	21.7	0.615	129.5	133.5	29.4	4.55	2.57e-44	14.91	1.35e-102	0.84
chr1-385	chr1	165421560	165421730	+	21.6	0.662	136	133.5	33	4.04	4.31e-39	25.98	8.65e-134	0.77
chr4-406	chr4	82380759	82380929	+	21.6	0.678	132	132.5	27.3	4.85	6.58e-47	11.06	6.36e-87	0.77
chr12-253	chr12	35283506	35283676	+	21.6	0.692	131	134.5	29.4	4.58	5.62e-45	9.16	4.02e-76	0.86
chr2-394	chr2	15146514	15146684	+	21.6	0.7	133.5	131.5	25.3	5.2	9.28e-50	10.91	1.4e-85	0.83
chr5-441	chr5	144944511	144944681	+	21.6	0.693	130.5	131.5	26.5	4.96	1.35e-47	8.55	1.86e-73	0.8
chr6-349	chr6	114646345	114646515	+	21.6	0.748	132	131.5	31.8	4.13	1.67e-39	13.18	4.41e-96	0.85
chr11-510	chr11	79229361	79229531	+	21.6	0.601	131.5	131.5	29.8	4.42	2.14e-42	8.46	2.78e-73	0.78
chr18-211	chr18	46607903	46608073	+	21.6	0.641	129	131.5	29.8	4.42	2.14e-42	6.55	1.25e-60	0.88
chr4-412	chr4	19571071	19571241	+	21.5	0.723	131	131	31.4	4.17	4.6e-40	6.95	3.02e-63	0.81
chr6-381	chr6	97291668	97291838	+	21.5	0.705	127	131	29.8	4.4	2.14e-42	11.75	1.01e-88	0.82
chr13-241	chr13	69582507	69582677	+	21.5	0.65	133.5	131	28.6	4.59	2.94e-44	12.51	1.55e-93	0.79
chr16-208	chr16	93874929	93875099	+	21.5	0.629	132.5	131	30.2	4.34	8.48e-42	14.27	1.54e-99	0.76
chr5-440	chr5	122937093	122937263	+	21.4	0.717	130.5	131	32.6	4.01	2.05e-38	13.7	1.4e-97	0.82
chr12-236	chr12	35284537	35284707	+	21.3	0.639	134	132.5	28.1	4.71	1.42e-45	9.06	2.56e-76	0.74
chr19-240	chr19	40088512	40088682	+	21.3	0.73	132	132	30.6	4.31	7.6e-42	14.38	2.19e-99	0.85
chr4-472	chr4	135231685	135231855	+	21.2	0.737	126	129.5	29.4	4.41	1.04e-41	17.53	8.98e-110	0.89
chr15-308	chr15	3452265	3452435	+	21.2	0.712	132.5	129.5	26.1	4.96	6.64e-47	11.99	9.56e-90	0.84
chr15-300	chr15	3489269	3489439	+	21.2	0.699	135	129.5	32.2	4.02	9.73e-38	8.16	1.39e-70	0.81
chr6-374	chr6	116260557	116260727	+	21.1	0.662	128	129	29.4	4.39	1.04e-41	8.58	1.68e-72	0.82
chr7-429	chr7	123187286	123187456	+	21.1	0.635	133.5	128.5	23.3	5.53	2.02e-51	14.72	4.3e-98	0.86
chr10-407	chr10	68092023	68092193	+	21.1	0.623	128	129	22	5.86	1.14e-54	6.57	2.8e-58	0.75
chr15-330	chr15	77822195	77822365	+	21.1	0.629	128	128.5	31.8	4.04	1.14e-37	7.68	6.44e-67	0.78
chr1-418	chr1	84399785	84399955	+	21	0.704	131.5	129	31.8	4.05	2.82e-38	22.26	1.49e-121	0.81
chr3-326	chr3	22091797	22091967	+	21	0.7	128	128.5	29.8	4.32	1.79e-40	9.56	2.87e-77	0.8
chr7-452	chr7	114364041	114364211	+	21	0.69	130	128	25.3	5.06	1.27e-47	15.4	3.56e-101	0.86
chr15-314	chr15	88851892	88852062	+	21	0.589	131.5	131.5	32.2	4.08	5.9e-39	6	2.09e-55	0.77
chr3-317	chr3	14687349	14687519	+	20.9	0.747	129	128	27.7	4.61	1.53e-43	21.78	2.94e-119	0.8
chr16-213	chr16	35098045	35098215	+	20.9	0.631	130.5	130	22.8	5.69	9.76e-54	17.63	2.39e-107	0.83
chr4-452	chr4	118359765	118359935	+	20.8	0.627	127.5	127.5	22.4	5.68	2.68e-52	5.68	1.78e-52	0.82
chr6-384	chr6	141992626	141992796	+	20.8	0.729	126.5	127	24.5	5.19	2.24e-48	19.5	6.75e-112	0.87
chr15-335	chr15	8324172	8324342	+	20.8	0.69	127	127	31	4.1	3.82e-38	30.93	4.51e-138	0.88
chr7-457	chr7	141052507	141052677	+	20.7	0.726	129.5	126.5	28.6	4.43	5.59e-41	6.21	6.2e-56	0.81
chr9-385	chr9	7891197	7891367	+	20.7	0.644	126.5	126.5	26.9	4.7	1.7e-43	18	2.01e-108	0.82
chr2-442	chr2	165006897	165007067	+	20.6	0.664	129	126	26.9	4.68	1.7e-43	13.2	8.96e-93	0.81
chr13-279	chr13	104636062	104636232	+	20.6	0.649	127	126.5	27.7	4.56	3.25e-42	10.42	6.43e-81	0.79
chr4-460	chr4	101683172	101683342	+	20.6	0.676	127	126	29.8	4.23	3.3e-39	19.66	4.16e-112	0.79
chr6-365	chr6	108472019	108472189	+	20.6	0.79	129	125.5	26.5	4.73	1.77e-43	19.13	1.01e-110	0.8
chr11-605	chr11	72686011	72686181	+	20.6	0.719	121.5	125.5	23.3	5.4	3.32e-49	10.69	2.26e-81	0.87
chrX-11	chrX	12323371	12323541	+	20.6	0.734	126.5	126	17.9	7.02	7.98e-62	21.66	3.94e-117	0.8
chr6-367	chr6	57541124	57541294	+	20.5	0.638	128.5	127	22.8	5.56	1.77e-51	6.46	1.74e-57	0.81
chr10-421	chr10	39625066	39625236	+	20.5	0.679	125.5	125	29.4	4.26	3.73e-39	10.6	1.11e-79	0.82
chr12-308	chr12	70196511	70196681	+	20.5	0.698	120	125.5	31	4.05	6.4e-37	20.53	1.48e-114	0.88
chr16-231	chr16	42999116	42999286	+	20.5	0.662	127	125.5	24.9	5.04	3.17e-46	19.01	1.23e-108	0.85
chr1-472	chr1	74721262	74721432	+	20.4	0.582	124	124.5	29.4	4.24	1.59e-38	4.57	1.25e-41	0.81
chr5-492	chr5	120560988	120561158	+	20.4	0.592	124	124.5	29.8	4.18	5.88e-38	7.41	3.31e-63	0.81
chr10-453	chr10	93072840	93073010	+	20.4	0.643	122	124.5	20.4	6.1	2.65e-54	8.83	6.16e-71	0.85
chr16-238	chr16	4395287	4395457	+	20.4	0.723	124.5	124.5	28.1	4.42	2.73e-40	17.16	2.6e-104	0.82
chr16-227	chr16	78305635	78305805	+	20.4	0.543	128	125.5	31	4.05	6.4e-37	5.06	4.77e-46	0.77
chr4-487	chr4	105089562	105089732	+	20.3	0.734	123.5	124	27.3	4.54	1.6e-41	16.66	5.26e-102	0.83
chr10-419	chr10	71389398	71389568	+	20.3	0.665	126	124.5	27.7	4.49	6.69e-41	16.14	1.3e-100	0.8
chr10-411	chr10	80663871	80664041	+	20.3	0.657	127	124.5	28.1	4.42	2.73e-40	5.38	6.94e-49	0.84
chr10-437	chr10	80957996	80958166	+	20.3	0.602	124	124.5	22.8	5.45	2.98e-49	4.26	2.91e-38	0.8
chr15-336	chr15	3229087	3229257	+	20.3	0.679	126.5	124	26.5	4.68	8.35e-43	12.1	3.97e-86	0.81
chr2-488	chr2	152784706	152784876	+	20.2	0.677	123	123.5	24.5	5.05	1.56e-45	11.29	9.45e-81	0.76
chr3-334	chr3	148685179	148685349	+	20.2	0.686	126	123	27.7	4.43	3e-40	9.58	5.47e-75	0.85
chr10-438	chr10	88507862	88508032	+	20.2	0.707	124	125.5	29.8	4.21	1.4e-38	7.33	2.15e-61	0.81
chr8-445	chr8	24430046	24430216	+	20.1	0.636	122	122.5	26.5	4.62	1.82e-41	7.74	2.26e-64	0.82
chr8-434	chr8	36665888	36666058	+	20.1	0.693	123	122.5	25.7	4.77	9.01e-43	11.62	1.85e-83	0.78
chr9-404	chr9	63535095	63535265	+	20.1	0.732	125	123	30.6	4.02	3.04e-36	9.21	2.46e-72	0.81
chr17-336	chr17	29122910	29123080	+	20.1	0.696	126.5	123	30.6	4.02	3.04e-36	15.05	2.49e-96	0.81
chr18-228	chr18	12793756	12793926	+	20.1	0.703	124.5	122.5	24.9	4.92	3.94e-44	14.59	1.31e-94	0.83
chr18-207	chr18	31766928	31767098	+	20.1	0.724	129.5	122.5	27.3	4.48	3.27e-40	14.85	1.73e-95	0.82
chr18-233	chr18	44633837	44634007	+	20.1	0.692	123.5	122.5	24.9	4.92	3.94e-44	15.09	2.82e-96	0.88
chr18-235	chr18	74882412	74882582	+	20.1	0.607	123.5	123.5	27.3	4.52	7.25e-41	9.25	1.6e-72	0.78
chr2-456	chr2	3641320	3641490	+	20	0.601	126.5	122.5	29	4.23	7.69e-38	12.58	6.31e-86	0.8
chr13-260	chr13	114462905	114463075	+	20	0.688	130	123	30.6	4.02	3.04e-36	6.63	2.56e-57	0.85
chr18-237	chr18	9393429	9393599	+	20	0.696	122	122	29	4.21	7.69e-38	23.28	4.73e-117	0.82
chr18-229	chr18	32145441	32145611	+	20	0.652	124	123	22.8	5.38	1.62e-48	9.79	3.18e-74	0.81
chr1-492	chr1	164152977	164153147	+	19.9	0.681	121	121.5	27.3	4.45	1.46e-39	8.1	9.07e-66	0.85
chr6-405	chr6	124676342	124676512	+	19.9	0.591	123	124	24.5	5.07	3.08e-46	7.86	2.24e-64	0.79
chr11-582	chr11	51759377	51759547	+	19.9	0.72	123.5	122	24.9	4.9	3.94e-44	4.42	1.56e-39	0.89
chr1-485	chr1	87779792	87779962	+	19.8	0.686	122	122	15.1	8.08	2.07e-66	14.28	1.75e-91	0.83
chr2-503	chr2	65123788	65123958	+	19.8	0.674	121	121.5	28.1	4.32	2.29e-38	10.84	8.07e-79	0.84
chr9-435	chr9	74801177	74801347	+	19.8	0.7	120.5	121.5	27.7	4.38	5.87e-39	15.35	1.53e-96	0.82
chr12-301	chr12	7920022	7920192	+	19.8	0.733	121.5	121	26.9	4.49	3.55e-40	12.6	5.16e-86	0.87
chr13-310	chr13	33966112	33966282	+	19.8	0.689	122.5	121.5	30.2	4.03	1.45e-35	11.81	9.17e-84	0.82
chr15-361	chr15	100320591	100320761	+	19.8	0.673	121.5	122	30.2	4.04	3.57e-36	7.84	1.87e-64	0.84
chr1-486	chr1	136842406	136842576	+	19.7	0.565	122	121	24.1	5.03	7.69e-45	10.62	3.07e-77	0.86
chr3-381	chr3	129564940	129565110	+	19.7	0.762	119.5	120.5	28.6	4.22	3.71e-37	9.94	1e-74	0.79
chr8-439	chr8	123242397	123242567	+	19.7	0.636	123	120.5	19.2	6.29	6.96e-54	7.32	1.14e-60	0.82
chr9-421	chr9	36808294	36808464	+	19.7	0.629	122.5	121.5	29.4	4.14	1.18e-36	16.36	7.1e-99	0.77
chr19-287	chr19	46641655	46641825	+	19.7	0.652	123.5	121	19.2	6.31	1.1e-54	5.11	2.01e-44	0.78
chr5-511	chr5	150598804	150598974	+	19.7	0.647	121.5	122.5	24.9	4.92	3.94e-44	5.66	6.13e-49	0.83
chr6-429	chr6	34896533	34896703	+	19.7	0.652	118.5	120.5	26.5	4.54	3.84e-40	10.76	1.13e-78	0.88
chr17-376	chr17	12385531	12385701	+	19.7	0.707	119.5	120	26.5	4.53	3.84e-40	6.92	2.57e-58	0.83
chr1-470	chr1	106169912	106170082	+	19.6	0.648	124.5	119.5	29.8	4.01	6.88e-35	4.77	1.23e-41	0.83
chr19-293	chr19	43813425	43813595	+	19.6	0.668	122	119.5	28.6	4.19	1.56e-36	11.04	1.41e-78	0.77
chr3-393	chr3	130612057	130612227	+	19.5	0.688	118	119	20.8	5.72	1.44e-49	11.44	4.82e-80	0.82
chr6-414	chr6	34865696	34865866	+	19.5	0.665	121	119	25.7	4.63	9.46e-41	10.95	7.29e-79	0.82
chr9-439	chr9	54298281	54298451	+	19.5	0.732	120	119	26.1	4.56	4.12e-40	18.84	6.04e-105	0.87
chr16-239	chr16	24517665	24517835	+	19.5	0.716	124	119	29.4	4.05	1.99e-35	10.14	2.01e-74	0.89
chr10-440	chr10	69916913	69917083	+	19.4	0.659	123.5	122.5	19.2	6.39	1.73e-55	11.97	3.54e-82	0.82
chr11-653	chr11	90358098	90358268	+	19.4	0.757	118	118.5	27.3	4.34	1.25e-37	7.99	8.59e-64	0.85
chr4-538	chr4	43350303	43350473	+	19.3	0.72	118.5	118	27.3	4.32	1.25e-37	14	7.83e-89	0.81
chr4-548	chr4	149798871	149799041	+	19.3	0.609	118.5	118	26.5	4.45	7.83e-39	4.06	1.87e-34	0.78
chr12-328	chr12	100996592	100996762	+	19.3	0.661	118.5	118.5	29.4	4.03	8.1e-35	14.74	2.93e-92	0.8
chr2-500	chr2	64974586	64974756	+	19.3	0.616	121.5	118	24.9	4.74	2.19e-41	8.55	2.79e-66	0.84
chr19-301	chr19	23061233	23061403	+	19.3	0.658	120.5	117.5	27.3	4.3	5.4e-37	6.76	1.07e-55	0.81
chr6-434	chr6	72161784	72161954	+	19.2	0.663	117.5	117	26.9	4.35	1.39e-37	5.5	4.26e-47	0.84
chr12-346	chr12	39952975	39953145	+	19.2	0.755	115	117.5	25.7	4.57	2.02e-39	7.46	1.55e-58	0.88
chr1-506	chr1	182412968	182413138	+	19.1	0.685	119.5	116.5	26.5	4.39	1.54e-37	8.73	1.14e-66	0.8
chr4-519	chr4	40830662	40830832	+	19.1	0.685	120	117	28.6	4.1	2.71e-35	8.48	3.53e-65	0.8
chr11-643	chr11	52360860	52361030	+	19.1	0.569	118.5	116.5	27.7	4.2	8.64e-36	7.29	1.1e-58	0.81
chr12-340	chr12	71044595	71044765	+	19.1	0.705	115.5	116.5	28.1	4.14	3.14e-35	7.5	9.01e-60	0.82
chr19-290	chr19	32527238	32527408	+	19.1	0.711	123	117	27.7	4.22	2.04e-36	7.47	1.34e-59	0.84
chr3-408	chr3	121867381	121867551	+	19	0.627	116	116	29	4.01	3.85e-34	10.62	4.62e-74	0.79
chr4-559	chr4	145286751	145286921	+	19	0.68	117.5	117	27.3	4.28	5.4e-37	13.42	2.64e-86	0.8
chr5-522	chr5	98996011	98996181	+	19	0.671	119.5	119.5	26.9	4.44	7.15e-39	14.35	1.81e-89	0.86
chr5-551	chr5	135646101	135646271	+	19	0.631	116.5	116	26.9	4.31	6.07e-37	8.8	5.04e-67	0.83
chr11-664	chr11	50184958	50185128	+	19	0.685	116.5	116	26.1	4.44	3.83e-38	10.53	7.01e-74	0.85
chr2-529	chr2	65226636	65226806	+	18.9	0.724	118.5	115.5	22.4	5.15	1.74e-43	12.8	3.19e-83	0.87
chr4-585	chr4	108079977	108080147	+	18.9	0.73	115.5	115.5	26.5	4.36	6.78e-37	5.33	6.56e-45	0.86
chr7-555	chr7	67168531	67168701	+	18.9	0.595	118	117.5	23.3	5.05	1.87e-43	9.98	7.4e-72	0.86
chr6-477	chr6	72235347	72235517	+	18.8	0.588	112.5	115	27.7	4.15	3.62e-35	6.03	4.01e-50	0.82
chr12-322	chr12	110232138	110232308	+	18.8	0.577	119	116	26.1	4.44	3.83e-38	5.95	1.41e-49	0.8
chr5-533	chr5	147017721	147017891	+	18.8	0.668	118	115	25.3	4.55	9.92e-39	12.97	4.27e-83	0.83
chr11-683	chr11	60823855	60824025	+	18.8	0.657	115	115	24.9	4.62	2.29e-39	9.99	2.49e-71	0.82
chr12-353	chr12	21302036	21302206	+	18.8	0.647	114.5	115	22.8	5.03	9.22e-43	9.07	1.18e-66	0.83
chr4-561	chr4	70482051	70482221	+	18.7	0.741	117	114	21.2	5.37	5.01e-45	18.94	7.48e-101	0.83
chr12-362	chr12	75667036	75667206	+	18.6	0.683	113.5	115	25.7	4.48	4.17e-38	5.96	7.92e-49	0.88
chr12-351	chr12	110021021	110021191	+	18.6	0.631	115	113.5	17.1	6.62	5.04e-53	4.56	5.27e-38	0.81
chr14-303	chr14	17725341	17725511	+	18.6	0.699	114	114.5	26.1	4.39	7.53e-37	10.26	8e-71	0.81
chr19-352	chr19	29134370	29134540	+	18.5	0.663	113.5	114	25.7	4.44	1.87e-37	6.41	2.3e-51	0.85
chr19-360	chr19	43767626	43767796	+	18.5	0.704	112	115	24.5	4.7	5.12e-40	11.6	5.14e-76	0.84
chr19-361	chr19	56531347	56531517	+	18.5	0.74	111.5	113	28.1	4.01	2.16e-33	10.37	4.64e-70	0.87
chr4-608	chr4	71839598	71839768	+	18.4	0.688	113	113	24.9	4.54	4.87e-38	21.59	5.66e-105	0.87
chr5-576	chr5	31297253	31297423	+	18.4	0.566	112.5	113	26.9	4.2	4.76e-35	8.46	2.62e-62	0.79
chr8-518	chr8	33881562	33881732	+	18.4	0.641	115.5	113	27.3	4.13	1.74e-34	14.18	6.77e-86	0.86
chr9-482	chr9	71175791	71175961	+	18.4	0.66	115	112.5	26.5	4.24	5.43e-35	14.8	7.82e-88	0.83
chr9-509	chr9	90251059	90251229	+	18.4	0.703	113	113	23.7	4.78	5.47e-40	16.58	5.35e-92	0.8
chr10-496	chr10	20071706	20071876	+	18.4	0.647	116.5	113	27.7	4.07	6.21e-34	8.03	7.54e-61	0.83
chr6-462	chr6	37597236	37597406	+	18.4	0.654	114	112	26.9	4.16	2.01e-34	13.99	2.37e-84	0.83
chr8-536	chr8	46499913	46500083	+	18.4	0.627	113	112	24.5	4.58	5.21e-38	8.78	6.5e-64	0.81
chr9-493	chr9	21726609	21726779	+	18.4	0.623	114	113.5	26.5	4.28	1.27e-35	4.6	1.08e-37	0.81
chr13-344	chr13	23820677	23820847	+	18.4	0.669	116.5	114.5	26.5	4.32	2.95e-36	9.75	1.91e-68	0.88
chr14-310	chr14	8016324	8016494	+	18.4	0.621	112.5	113	28.1	4.01	2.16e-33	15.56	4.14e-89	0.79
chr16-282	chr16	17345555	17345725	+	18.4	0.661	113.5	112	27.3	4.1	7.22e-34	12.22	2.59e-78	0.83
chr17-409	chr17	5014473	5014643	+	18.4	0.637	113.5	113.5	21.6	5.25	1.55e-43	10.83	2.36e-72	0.8
chr18-275	chr18	46630557	46630727	+	18.4	0.679	114.5	112	20.4	5.49	3.99e-45	4.21	1.43e-34	0.81
chr10-539	chr10	19937160	19937330	+	18.3	0.619	112	112	20.4	5.49	3.99e-45	5.57	3.97e-45	0.82
chr13-356	chr13	47224122	47224292	+	18.3	0.573	113.5	112	26.5	4.22	5.43e-35	11.25	1.11e-74	0.81
chr16-281	chr16	44139095	44139265	+	18.3	0.585	114	114	20.4	5.59	1.28e-46	6.64	3.39e-52	0.85
chr19-346	chr19	40437769	40437939	+	18.3	0.697	115	112	24.5	4.58	5.21e-38	11.44	2.02e-75	0.86
chr3-439	chr3	95298190	95298360	+	18.2	0.757	111.5	111.5	27.7	4.02	1.03e-32	7.18	1.11e-54	0.89
chr4-622	chr4	97820992	97821162	+	18.2	0.657	111.5	111.5	22.4	4.97	1.15e-40	9.27	2.01e-66	0.84
chr5-587	chr5	140816118	140816288	+	18.2	0.764	111.5	111	27.7	4	1.03e-32	10.87	2.36e-73	0.93
chr6-490	chr6	145346905	145347075	+	18.2	0.619	112	111	22	5.04	2.24e-41	6.68	1.21e-52	0.83
chr12-350	chr12	103550161	103550331	+	18.2	0.703	115	113	25.3	4.47	2.04e-37	11.97	6.17e-77	0.84
chr1-573	chr1	153698545	153698715	+	18.1	0.654	112.5	110.5	27.3	4.04	1.21e-32	5.34	1.11e-42	0.8
chr5-582	chr5	123182643	123182813	+	18.1	0.652	112	111.5	27.3	4.08	2.97e-33	5.78	3.47e-46	0.8
chr9-529	chr9	51975062	51975232	+	18.1	0.716	110.5	110.5	18.4	6.02	8.33e-48	6.5	6.46e-51	0.86
chr10-543	chr10	21449029	21449199	+	18.1	0.668	111.5	111	22	5.04	2.24e-41	6.32	4.93e-49	0.82
chr6-461	chr6	31192335	31192505	+	18	0.745	114	110	23.3	4.73	1.29e-38	6.97	6.35e-54	0.86
chr10-568	chr10	99233924	99234094	+	18	0.66	109.5	110.5	22.8	4.84	2.76e-39	7.28	9.72e-55	0.84
chr12-384	chr12	103863652	103863822	+	18	0.673	110	110	18.4	5.99	8.33e-48	6.11	5.85e-48	0.84
chr4-631	chr4	145066403	145066573	+	17.9	0.769	111	111	27.3	4.06	2.97e-33	22.68	1.96e-104	0.87
chr6-483	chr6	37751824	37751994	+	17.9	0.714	112	109.5	23.7	4.63	2.73e-37	11.07	7.49e-73	0.8
chr9-504	chr9	116111696	116111866	+	17.9	0.682	113.5	109.5	24.1	4.55	1.17e-36	15.95	1.17e-88	0.85
chr9-505	chr9	121890097	121890267	+	17.9	0.605	113.5	109.5	26.9	4.07	1.42e-32	12.12	2.13e-75	0.87
chr17-446	chr17	85056790	85056960	+	17.9	0.673	108	109.5	24.5	4.47	4.9e-36	5.37	6.08e-43	0.88
chr17-426	chr17	86501451	86501621	+	17.9	0.605	111.5	110.5	25.3	4.37	1.79e-35	4.1	5.12e-33	0.8
chr2-634	chr2	160334154	160334324	+	17.9	0.692	110	109	25.3	4.31	7.8e-35	6.72	5.87e-52	0.84
chr6-493	chr6	87808670	87808840	+	17.9	0.676	111.5	109.5	21.6	5.06	1.11e-40	5.04	2.56e-40	0.81
chr15-434	chr15	31365995	31366165	+	17.9	0.573	109	109.5	24.5	4.47	4.9e-36	5.13	3.13e-40	0.86
chrX-24	chrX	60014694	60014864	+	17.9	0.651	112	109	26.9	4.05	1.42e-32	18.67	6.96e-96	0.84
chr4-591	chr4	35225967	35226137	+	17.8	0.552	115	108.5	26.1	4.16	4.64e-33	7.59	3.21e-56	0.83
chr5-606	chr5	146011380	146011550	+	17.8	0.744	110	108.5	19.2	5.66	1.45e-44	8.04	1.41e-58	0.84
chr7-611	chr7	112466899	112467069	+	17.8	0.674	112	109.5	20	5.48	1.07e-43	12.41	6.5e-77	0.81
chr11-766	chr11	87471560	87471730	+	17.8	0.906	108	108.5	26.9	4.03	5.76e-32	19.19	9.7e-93	0.83
chr15-424	chr15	91050349	91050519	+	17.8	0.602	110	108.5	20	5.43	5.85e-43	6.46	9.14e-50	0.81
chr6-492	chr6	59685059	59685229	+	17.7	0.74	111.5	109.5	23.3	4.71	6.13e-38	24.72	2.25e-106	0.83
chr11-754	chr11	83737268	83737438	+	17.7	0.7	108.5	108	26.1	4.14	4.64e-33	8.66	7.62e-62	0.86
chr2-645	chr2	50294165	50294335	+	17.6	0.668	108.5	108	23.3	4.65	2.88e-37	8.26	1.23e-58	0.83
chr16-316	chr16	58662490	58662660	+	17.6	0.667	107.5	107.5	24.9	4.32	3.79e-34	10.58	5.34e-69	0.8
chr4-645	chr4	40847442	40847612	+	17.5	0.642	109.5	107.5	25.3	4.25	1.44e-33	5.69	1.51e-44	0.85
chr7-628	chr7	138902260	138902430	+	17.5	0.653	110.5	107	26.5	4.04	6.76e-32	7.38	4.43e-54	0.81
chr3-475	chr3	60094833	60095003	+	17.5	0.642	108	106.5	24.5	4.35	4.24e-34	12.05	1.76e-74	0.82
chr6-502	chr6	121836503	121836673	+	17.5	0.713	110.5	106.5	24.9	4.28	1.64e-33	8.34	2.56e-56	0.83
chr19-383	chr19	32506618	32506788	+	17.5	0.735	108	106.5	21.6	4.93	1.39e-38	10.48	2.01e-68	0.85
chr6-540	chr6	85820362	85820532	+	17.4	0.744	106.5	107	23.3	4.6	1.34e-36	7.79	8.93e-56	0.84
chr16-322	chr16	35075682	35075852	+	17.4	0.671	106	106.5	26.1	4.08	7.92e-32	17.78	4.03e-90	0.82
chr4-731	chr4	48273231	48273401	+	17.3	0.749	102.5	105.5	24.1	4.38	4.72e-34	21.55	1.18e-98	0.91
chr17-480	chr17	86616051	86616221	+	17.3	0.703	104	106.5	21.2	5.02	2.76e-39	12.66	1.84e-74	0.88
chrX-32	chrX	52147881	52148051	+	17.3	0.735	106.5	105.5	18.4	5.75	5.93e-44	15.39	6.26e-84	0.81
chr1-633	chr1	179571773	179571943	+	17.2	0.65	105.5	105.5	22.4	4.7	1.49e-36	12.98	6.62e-77	0.87
chr7-605	chr7	14439739	14439909	+	17.2	0.733	112.5	105	19.6	5.36	1.55e-41	8.05	3.2e-56	0.83
chrX-28	chrX	42045081	42045251	+	17.2	0.664	107.5	107.5	22	4.88	1.38e-38	23.15	1.19e-99	0.8
chr2-696	chr2	107964947	107965117	+	17.1	0.689	104.5	104.5	24.9	4.2	2.96e-32	21.18	5.09e-94	0.8
chr5-651	chr5	150581232	150581402	+	17.1	0.677	106	104.5	15.1	6.92	1.23e-50	4.47	1.25e-34	0.82
chr8-611	chr8	61588424	61588594	+	17.1	0.659	105	105	22.8	4.6	6.6e-36	6.43	8.51e-48	0.85
chr15-456	chr15	88920213	88920383	+	17.1	0.706	106.5	105	19.6	5.36	1.55e-41	4.68	4.91e-36	0.82
chr6-596	chr6	120589348	120589518	+	17	0.679	102	105	26.1	4.02	3.23e-31	8.43	6.24e-57	0.92
chr10-585	chr10	125325025	125325195	+	17	0.663	107.5	104	22.4	4.64	6.98e-36	7.8	1.69e-55	0.81
chr13-433	chr13	100026059	100026229	+	17	0.728	104	104	21.2	4.9	6.85e-38	22.84	4.5e-99	0.87
chr18-325	chr18	84874692	84874862	+	17	0.677	104	104	18.4	5.67	3.4e-43	9.17	3.82e-61	0.83
chr19-386	chr19	57377363	57377533	+	17	0.62	108	105	21.6	4.86	6.82e-38	11.55	2.36e-71	0.84
chr2-704	chr2	32966252	32966422	+	17	0.604	103.5	104.5	24.1	4.34	2.07e-33	5.89	1.13e-43	0.83
chr10-620	chr10	87894850	87895020	+	17	0.666	104	104	22.8	4.55	3.04e-35	6.35	4.74e-47	0.83
chr1-619	chr1	74400609	74400779	+	16.9	0.617	107	104	21.6	4.81	3.32e-37	5.47	1.56e-41	0.79
chr4-722	chr4	32314970	32315140	+	16.9	0.631	103	103	20	5.15	2.48e-39	13.67	1.24e-77	0.82
chr8-607	chr8	56232647	56232817	+	16.9	0.685	105.5	103.5	24.1	4.3	8.95e-33	8.73	2.24e-59	0.83
chr16-325	chr16	24254766	24254936	+	16.9	0.608	105	103	25.7	4.01	1.54e-30	14.79	4e-80	0.88
chr18-331	chr18	54984832	54985002	+	16.8	0.764	103	102.5	14.3	7.18	4.5e-51	13.11	5.8e-75	0.88
chr19-390	chr19	4068385	4068555	+	16.8	0.722	106.5	102.5	23.7	4.33	1.01e-32	5.09	2.21e-38	0.85
chr4-730	chr4	45523952	45524122	+	16.7	0.711	102.5	102	16.7	6.1	4.09e-45	6.15	2.13e-45	0.86
chr5-684	chr5	22433671	22433841	+	16.7	0.708	103	102	24.9	4.1	5.15e-31	17.27	1.04e-84	0.86
chr10-613	chr10	40499923	40500093	+	16.7	0.685	104.5	103.5	25.3	4.09	4.42e-31	11.55	5.08e-70	0.87
chr11-865	chr11	86603851	86604021	+	16.7	0.757	101	102.5	22.8	4.49	6.27e-34	18.91	1.66e-89	0.88
chr5-655	chr5	120490781	120490951	+	16.6	0.63	105.5	101.5	24.9	4.08	2.12e-30	7.88	3.99e-54	0.88
chr8-640	chr8	46888736	46888906	+	16.6	0.635	101.5	101	21.6	4.67	3.62e-35	14.3	5.49e-78	0.81
chr13-453	chr13	74484394	74484564	+	16.6	0.746	101	101	20	5.05	6.55e-38	26.45	1.44e-103	0.87
chr18-344	chr18	32173285	32173455	+	16.6	0.743	101.5	102	22.4	4.55	1.49e-34	14.46	9.96e-77	0.83
chr1-673	chr1	51849730	51849900	+	16.5	0.676	101.5	100.5	23.7	4.25	1.86e-31	16.65	3.29e-83	0.85
chr4-753	chr4	144993338	144993508	+	16.5	0.72	101.5	102	18.4	5.56	1.08e-41	14.74	1.25e-74	0.85
chr5-725	chr5	122698615	122698785	+	16.5	0.654	100.5	101.5	22.8	4.44	2.81e-33	9.05	2.42e-58	0.84
chr6-588	chr6	119416737	119416907	+	16.5	0.684	102.5	100.5	17.5	5.73	7.91e-42	4.34	3.57e-32	0.82
chr16-334	chr16	45986425	45986595	+	16.5	0.622	104	100.5	22	4.56	7.34e-34	6.85	1.53e-48	0.84
chr2-736	chr2	31521966	31522136	+	16.4	0.61	101.5	102	21.2	4.81	1.64e-36	5.32	2.33e-39	0.84
chr3-538	chr3	96106285	96106455	+	16.4	0.722	101.5	100.5	24.5	4.11	2.47e-30	9.73	6.59e-62	0.85
chr6-622	chr6	28737746	28737916	+	16.4	0.736	100	100.5	22	4.56	7.34e-34	15.69	5.26e-80	0.82
chr7-785	chr7	98413888	98414058	+	16.4	0.671	97	100	20	5	3.32e-37	7.97	3.03e-54	0.86
chr15-465	chr15	58893393	58893563	+	16.4	0.728	105	100	22.8	4.38	1.25e-32	5.88	6.09e-43	0.85
chr16-354	chr16	14155767	14155937	+	16.4	0.745	100.5	100	17.9	5.57	5.27e-41	6.45	2.67e-46	0.89
chr4-775	chr4	150003182	150003352	+	16.3	0.659	100	99.5	24.5	4.07	1.01e-29	6.24	8.79e-44	0.88
chr5-733	chr5	90425331	90425501	+	16.3	0.629	99.5	99.5	21.6	4.6	7.86e-34	8.31	4.41e-55	0.89
chr6-586	chr6	59032853	59033023	+	16.3	0.801	102.5	99.5	18.8	5.3	1.07e-38	14.96	2.81e-78	0.85
chr11-875	chr11	101645509	101645679	+	16.3	0.794	100.5	100	22.4	4.46	3.07e-33	8.59	5.58e-56	0.88
chr16-358	chr16	30253991	30254161	+	16.3	0.66	100	100	24.9	4.02	8.62e-30	5.45	7.73e-40	0.83
chr17-515	chr17	65594756	65594926	+	16.3	0.703	100.5	99.5	20.4	4.88	8.22e-36	20.35	1.44e-90	0.87
chr2-739	chr2	113537821	113537991	+	16.2	0.616	101.5	99	23.7	4.18	7.89e-31	12.23	2.28e-69	0.88
chr4-723	chr4	45474980	45475150	+	16.2	0.589	103	99.5	23.3	4.28	2.11e-31	6.14	4.48e-44	0.83
chr5-744	chr5	87092068	87092238	+	16.2	0.684	99	99.5	12.6	7.87	4.87e-53	7.28	8.04e-50	0.92
chr5-759	chr5	89448073	89448243	+	16.2	0.741	98	99	24.5	4.05	1.01e-29	6.4	6.03e-45	0.92
chr18-348	chr18	38878194	38878364	+	16.2	0.702	101	99	22.8	4.33	5.47e-32	8.17	1.2e-54	0.82
chr14-354	chr14	100344872	100345042	+	16.1	0.792	104	99	21.2	4.67	1.78e-34	15.96	4.32e-80	0.82
chr6-635	chr6	85916724	85916894	+	16.1	0.66	99	98.5	23.7	4.16	3.31e-30	6.84	2.08e-46	0.9
chr6-598	chr6	141962007	141962177	+	16.1	0.727	102	98	22.8	4.29	2.38e-31	9.39	2.33e-59	0.81
chr10-637	chr10	89624303	89624473	+	16.1	0.695	102	98.5	24.1	4.09	1.18e-29	10.59	3.67e-63	0.9
chr3-584	chr3	121277144	121277314	+	16	0.681	97.5	97.5	22.4	4.35	2.66e-31	10.33	3.36e-62	0.8
chr9-636	chr9	47624726	47624896	+	16	0.705	98.5	97.5	23.3	4.19	3.81e-30	11.54	1.88e-66	0.85
chr9-650	chr9	63534333	63534503	+	16	0.671	97.5	97.5	20.8	4.69	8.79e-34	6.94	2.01e-47	0.84
chr2-803	chr2	5669719	5669889	+	15.9	0.607	97	97.5	21.2	4.6	3.87e-33	7.47	8.59e-50	0.83
chr3-573	chr3	121187533	121187703	+	15.9	0.602	98.5	97	20.8	4.66	8.79e-34	6.52	8.1e-44	0.87
chr5-773	chr5	89459704	89459874	+	15.9	0.727	97	97	19.2	5.06	1.6e-36	5.56	8.76e-40	0.84
chr7-748	chr7	12998980	12999150	+	15.9	0.734	99.5	97	21.2	4.57	3.87e-33	5.46	3.76e-39	0.87
chr11-854	chr11	48852283	48852453	+	15.9	0.663	101.5	99	23.3	4.26	2.11e-31	4.37	1.28e-31	0.82
chr11-914	chr11	60241470	60241640	+	15.9	0.646	97.5	97	21.2	4.57	3.87e-33	5.8	3.25e-40	0.91
chr14-395	chr14	32181092	32181262	+	15.9	0.63	97.5	97	20.4	4.76	1.93e-34	13.33	2.59e-71	0.82
chr2-1241	chr2	73867882	73868052	+	15.8	0.912	72.5	96.5	14.3	6.76	5.21e-46	33.82	3.08e-108	1.64
chr3-548	chr3	96528697	96528867	+	15.8	0.761	100.5	96.5	20	4.83	1.98e-34	6.04	1.28e-41	0.85
chr4-806	chr4	108051946	108052116	+	15.8	0.598	98	98	24.1	4.07	1.18e-29	9.72	1.05e-58	0.82
chr7-755	chr7	99097293	99097463	+	15.8	0.687	99	96.5	18.4	5.26	2.79e-37	4.82	2.28e-34	0.8
chr11-913	chr11	59809831	59810001	+	15.8	0.599	97.5	97.5	21.6	4.51	1.64e-32	8.63	6.99e-55	0.89
chr15-528	chr15	88895993	88896163	+	15.8	0.77	97	96.5	24.1	4.01	1.95e-28	5.73	3.32e-40	0.85
chr17-509	chr17	28460488	28460658	+	15.8	0.761	101	97	23.7	4.1	1.38e-29	11.78	4.39e-66	0.92
chr18-376	chr18	65249955	65250125	+	15.8	0.558	96.5	97	22.8	4.25	1.02e-30	5.06	1.24e-35	0.82
chr1-731	chr1	164158716	164158886	+	15.7	0.705	97	96	21.2	4.53	1.77e-32	8.69	5.16e-54	0.87
chr3-594	chr3	55141510	55141680	+	15.7	0.721	96.5	96	20	4.8	1.98e-34	13.51	5.14e-72	0.81
chr6-632	chr6	22001468	22001638	+	15.7	0.63	99	96.5	23.7	4.08	5.66e-29	13.67	9.78e-72	0.8
chr8-680	chr8	89279314	89279484	+	15.7	0.657	98	96	15.1	6.36	4.83e-44	4.3	8.65e-31	0.84
chr10-704	chr10	54058803	54058973	+	15.7	0.617	95.5	96	21.2	4.53	1.77e-32	12.69	1.04e-68	0.9
chr11-888	chr11	16795117	16795287	+	15.7	0.696	99	96	15.5	6.19	4.17e-43	8.46	2.43e-54	0.84
chr16-366	chr16	62872820	62872990	+	15.7	0.62	99.5	96	22.8	4.2	4.36e-30	17.76	1.17e-81	0.85
chr1-762	chr1	139548636	139548806	+	15.7	0.796	95	95.5	20	4.78	9.52e-34	28.3	5.29e-100	0.89
chr4-790	chr4	137773406	137773576	+	15.7	0.628	99	97	22.4	4.32	2.66e-31	4.82	3.56e-34	0.81
chr11-956	chr11	121510991	121511161	+	15.7	0.633	95.5	96.5	24.1	4.01	1.95e-28	8.62	1.07e-53	0.82
chr15-514	chr15	25976001	25976171	+	15.7	0.691	98.5	95.5	23.7	4.04	2.3e-28	17.48	2.36e-79	0.89
chr18-357	chr18	9503326	9503496	+	15.7	0.64	99	96	20.8	4.61	4.11e-33	8.46	1.4e-53	0.86
chr19-455	chr19	39989573	39989743	+	15.7	0.723	96.5	95.5	17.5	5.44	4.35e-38	17.13	3.09e-80	0.91
chr4-799	chr4	108114639	108114809	+	15.6	0.685	98.5	96	20.4	4.71	9.19e-34	4.06	3.1e-28	0.92
chr19-435	chr19	32628153	32628323	+	15.6	0.659	99.5	95.5	22.4	4.26	4.96e-30	4.55	2.33e-32	0.83
chr11-898	chr11	87003650	87003820	+	15.5	0.702	98.5	94.5	14.3	6.62	2.34e-44	8.85	4.02e-54	0.82
chr19-452	chr19	43777527	43777697	+	15.5	0.675	97	94.5	18.4	5.15	7.58e-36	4.76	5.94e-33	0.88
chr3-549	chr3	138415259	138415429	+	15.4	0.659	100.5	94	15.5	6.06	1.59e-41	10.85	7.37e-61	0.84
chr6-676	chr6	56920271	56920441	+	15.4	0.603	96	95	17.9	5.29	2.58e-37	6.96	2.77e-46	0.87
chr13-500	chr13	51089135	51089305	+	15.4	0.766	95.5	96	21.6	4.44	7.38e-32	7.45	5.35e-48	0.87
chr18-402	chr18	65093211	65093381	+	15.4	0.734	93.5	94	22	4.27	5.62e-30	5.92	1.08e-40	0.87
chr4-859	chr4	49553466	49553636	+	15.3	0.636	94	93.5	18.8	4.98	2.01e-34	4.99	1.75e-34	0.85
chr9-686	chr9	114819122	114819292	+	15.3	0.686	94	93.5	19.6	4.78	4.7e-33	5.94	1.47e-39	0.84
chr13-490	chr13	56449700	56449870	+	15.3	0.655	96.5	94	20	4.7	4.54e-33	10.73	2.65e-61	0.84
chr18-394	chr18	16758276	16758446	+	15.3	0.696	94	94.5	22.4	4.21	2.11e-29	11.85	4.38e-64	0.86
chr1-785	chr1	65173813	65173983	+	15.2	0.737	93	93	16.3	5.7	5.09e-39	4.07	9.16e-28	0.83
chr2-856	chr2	50287115	50287285	+	15.2	0.689	93	93.5	13.1	7.16	1.24e-46	13.48	2.41e-67	0.82
chr5-782	chr5	121686556	121686726	+	15.2	0.69	96.5	93	17.9	5.18	7.2e-36	5.79	1.55e-39	0.87
chr8-704	chr8	114137326	114137496	+	15.2	0.622	95	93.5	21.6	4.32	6.32e-30	4.93	3.13e-34	0.81
chr2-846	chr2	172452511	172452681	+	15.2	0.603	94.5	94	22	4.27	5.62e-30	6	3.63e-40	0.82
chr8-695	chr8	88869818	88869988	+	15.2	0.585	96	92.5	22.8	4.05	1.29e-27	7.21	1.4e-46	0.81
chr10-746	chr10	61717899	61718069	+	15.2	0.699	92	92.5	17.5	5.27	6.75e-36	7.1	7.34e-46	0.9
chr17-581	chr17	28420238	28420408	+	15.2	0.694	92.5	92.5	22.8	4.05	1.29e-27	9.91	5.46e-57	0.86
chr17-531	chr17	30135035	30135205	+	15.2	0.716	98.5	93	22	4.22	2.4e-29	8.89	1.05e-53	0.85
chr1-876	chr1	184851187	184851357	+	15.1	0.665	86.5	92	17.9	5.13	3.74e-35	5.44	1.55e-36	0.94
chr7-814	chr7	140725649	140725819	+	15.1	0.707	95	92	20	4.6	9.98e-32	6.45	3.83e-42	0.86
chr8-699	chr8	114561410	114561580	+	15.1	0.632	95.5	92	22.4	4.1	3.68e-28	6.52	3.83e-43	0.83
chr14-394	chr14	31112271	31112441	+	15.1	0.719	97.5	93	20	4.65	2.14e-32	13.64	9.05e-68	0.89
chr15-582	chr15	80685019	80685189	+	15.1	0.636	92	92	22	4.18	1.02e-28	8.49	1.01e-51	0.84
chr16-407	chr16	14139208	14139378	+	15.1	0.653	94.5	92.5	18.4	5.04	1.98e-34	8.61	9.02e-53	0.83
chr17-586	chr17	71096919	71097089	+	15.1	0.662	92.5	92	17.5	5.25	6.75e-36	6.96	2.33e-45	0.84
chr3-639	chr3	60168611	60168781	+	15	0.749	93	92	22.8	4.03	1.29e-27	7.6	7.26e-48	0.86
chr5-820	chr5	9047552	9047722	+	15	0.677	92.5	92.5	12.6	7.32	7.14e-47	8.52	2.67e-51	0.82
chr5-804	chr5	122800693	122800863	+	15	0.571	95	95	21.6	4.39	3.29e-31	5.21	3.76e-35	0.84
chr19-475	chr19	27327636	27327806	+	15	0.733	92.5	91.5	17.9	5.1	1.92e-34	14.63	4.33e-71	0.79
chr19-472	chr19	37209549	37209719	+	15	0.731	93	92	20	4.6	9.98e-32	5.21	4.05e-35	0.84
chr19-484	chr19	58050494	58050664	+	15	0.727	92	91.5	22	4.15	4.27e-28	15.7	1.07e-73	0.86
chr1-813	chr1	170428239	170428409	+	14.9	0.673	91	91	21.6	4.21	1.16e-28	14.69	1.73e-70	0.83
chr10-733	chr10	40063509	40063679	+	14.9	0.694	93	91	21.2	4.29	3.08e-29	10.56	1.29e-58	0.87
chr1-825	chr1	191423315	191423485	+	14.8	0.746	90.5	90.5	20.8	4.35	3.45e-29	5.13	2.8e-34	0.94
chr5-832	chr5	145903454	145903624	+	14.8	0.727	92	90.5	21.6	4.19	4.92e-28	7.08	1.78e-44	0.88
chr8-743	chr8	123813323	123813493	+	14.8	0.595	92	91	21.6	4.21	1.16e-28	6.02	1.95e-39	0.83
chr9-695	chr9	52047252	52047422	+	14.8	0.694	93	91.5	19.6	4.67	1.06e-31	8.3	3.28e-50	0.86
chr10-729	chr10	68533347	68533517	+	14.8	0.673	93.5	90.5	17.9	5.04	9.77e-34	8.36	1.85e-50	0.87
chr12-520	chr12	80832418	80832588	+	14.8	0.747	91	91.5	22	4.15	4.27e-28	11.01	2.82e-60	0.83
chr5-868	chr5	25155512	25155682	+	14.7	0.697	89.5	90	20.8	4.33	3.45e-29	7.33	1.86e-45	0.96
chr6-730	chr6	108445141	108445311	+	14.7	0.655	91.5	91.5	19.6	4.67	1.06e-31	6.41	1.11e-41	0.83
chr8-732	chr8	126728311	126728481	+	14.7	0.67	93	90	22.4	4.01	6.17e-27	10.96	3.99e-60	0.84
chr4-882	chr4	106539968	106540138	+	14.7	0.621	92.5	90	22	4.09	1.77e-27	11.02	7.87e-59	0.88
chr6-733	chr6	134559769	134559939	+	14.7	0.677	91.5	90	19.2	4.69	1.11e-31	5.77	8.17e-38	0.84
chr7-903	chr7	81592736	81592906	+	14.7	0.678	88	89.5	20	4.48	9.51e-30	7.25	4.2e-45	0.86
chr8-741	chr8	95422518	95422688	+	14.7	0.615	92	91	22	4.13	4.27e-28	6.57	8.06e-42	0.85
chr12-489	chr12	30369236	30369406	+	14.7	0.758	95	89.5	17.9	4.99	4.91e-33	7.02	3.36e-44	0.95
chr12-535	chr12	104289053	104289223	+	14.7	0.728	89	89.5	22	4.06	7.25e-27	15.2	6.14e-71	0.91
chr14-422	chr14	21105203	21105373	+	14.7	0.758	93.5	90	16.3	5.52	9.19e-37	6.55	6.33e-42	0.87
chr18-429	chr18	61894674	61894844	+	14.7	0.711	90	89.5	20	4.48	9.51e-30	12.83	7.42e-65	0.87
chr19-476	chr19	31868657	31868827	+	14.7	0.732	92.5	89.5	20.4	4.39	3.84e-29	7.71	3.79e-47	0.9
chr1-807	chr1	71646968	71647138	+	14.6	0.64	91	89	19.2	4.64	5.21e-31	6.68	6.59e-42	0.85
chr4-946	chr4	41637318	41637488	+	14.6	0.636	89	89	14.7	6.06	2.15e-39	5.38	4.98e-35	0.84
chr4-947	chr4	49510352	49510522	+	14.6	0.671	89	89	18.4	4.85	2.43e-32	8.2	1.06e-48	0.83
chr14-454	chr14	12105806	12105976	+	14.6	0.662	90.5	89	18.8	4.74	1.15e-31	4.8	5.03e-32	0.84
chr14-431	chr14	66118464	66118634	+	14.6	0.611	93	89	19.6	4.55	2.27e-30	7.82	8.22e-48	0.81
chr16-449	chr16	93860857	93861027	+	14.6	0.642	88.5	89	13.5	6.61	3.12e-42	9.35	6.05e-54	0.93
chr19-490	chr19	32599645	32599815	+	14.6	0.663	91	89	15.5	5.74	1.18e-37	8.73	7.8e-51	0.81
chr2-897	chr2	160798358	160798528	+	14.5	0.681	90	88.5	20	4.43	4.25e-29	14.41	1.65e-67	0.84
chr4-951	chr4	97818668	97818838	+	14.5	0.715	89	88.5	21.2	4.17	2.37e-27	5.25	3e-34	0.84
chr4-953	chr4	108065522	108065692	+	14.5	0.636	89	89	13.5	6.61	3.12e-42	4.13	5.04e-27	0.88
chr5-827	chr5	122475117	122475287	+	14.5	0.72	92	89.5	21.2	4.22	5.64e-28	13.8	9.75e-67	0.85
chr10-781	chr10	76572279	76572449	+	14.5	0.605	89	88.5	16.7	5.29	1.63e-34	4.42	4.68e-29	0.88
chr11-1078	chr11	60244621	60244791	+	14.5	0.699	88	88.5	21.6	4.09	8.49e-27	5.41	3.4e-35	0.87
chr4-866	chr4	97816139	97816309	+	14.4	0.738	93.5	88.5	16.7	5.29	1.63e-34	5.4	2.41e-35	0.88
chr4-978	chr4	99046508	99046678	+	14.4	0.745	87.5	88	15.9	5.53	4.48e-36	9.66	1.78e-54	0.91
chr18-432	chr18	16757299	16757469	+	14.4	0.717	89.5	88	20	4.4	4.25e-29	9.8	5.69e-55	0.91
chr1-842	chr1	72790797	72790967	+	14.3	0.663	88.5	88	20.4	4.31	1.68e-28	8.04	1.59e-47	0.87
chr3-702	chr3	152229323	152229493	+	14.3	0.695	87.5	87.5	20.8	4.21	2.73e-27	9.79	3.82e-54	0.86
chr11-1012	chr11	115679993	115680163	+	14.3	0.674	92.5	88	20.4	4.31	1.68e-28	11.29	1.57e-58	0.83
chr13-564	chr13	4265195	4265365	+	14.3	0.758	88.5	87.5	21.6	4.05	3.47e-26	28.57	4.85e-91	0.85
chr15-608	chr15	73170905	73171075	+	14.3	0.707	89.5	88.5	20.4	4.34	1.68e-28	12.62	7.25e-63	0.83
chr6-775	chr6	115677594	115677764	+	14.3	0.671	88	87	17.9	4.85	1.2e-31	5.48	1.27e-34	0.88
chr13-577	chr13	4431231	4431401	+	14.3	0.767	87.5	87	20	4.35	1.88e-28	8.61	5.56e-50	0.88
chr15-626	chr15	75955363	75955533	+	14.3	0.754	87.5	87	13.1	6.67	1.39e-41	13.26	7.32e-64	0.87
chr19-532	chr19	58533203	58533373	+	14.3	0.683	87	87	21.6	4.02	3.47e-26	16.84	3.24e-73	0.87
chr1-871	chr1	88206915	88207085	+	14.2	0.79	86.5	86.5	21.2	4.08	4.07e-26	5.8	9.1e-37	0.92
chr3-705	chr3	118480668	118480838	+	14.2	0.7	87	86.5	21.6	4	1.4e-25	8.08	3.56e-47	0.87
chr7-915	chr7	116425926	116426096	+	14.2	0.727	87	86.5	17.9	4.82	5.84e-31	17.2	5.98e-73	0.92
chr11-1019	chr11	35784089	35784259	+	14.2	0.719	91.5	89	22	4.04	7.25e-27	10.39	6.68e-55	0.89
chr3-714	chr3	52479369	52479539	+	14.1	0.699	86	86.5	19.6	4.42	2.08e-28	17.43	1.44e-72	0.85
chr13-584	chr13	40971314	40971484	+	14.1	0.711	87	86	19.2	4.49	5.08e-29	12.94	3.19e-63	0.87
chr19-522	chr19	9095236	9095406	+	14.1	0.752	87.5	86.5	20	4.33	8.19e-28	9.34	3.68e-52	0.87
chr2-950	chr2	67957595	67957765	+	14	0.705	86	86	21.2	4.05	4.07e-26	12.27	1.67e-60	0.86
chr4-990	chr4	104804220	104804390	+	14	0.686	87	86	17.5	4.9	1.21e-31	11.31	9.5e-58	0.84
chr5-947	chr5	137986461	137986631	+	14	0.746	86	85.5	19.2	4.46	2.29e-28	7.69	3.27e-45	0.92
chr6-828	chr6	94813737	94813907	+	14	0.607	85.5	85.5	14.3	5.99	3.73e-37	10.91	6.64e-56	0.84
chr12-544	chr12	103477712	103477882	+	14	0.692	88	86	20.4	4.22	3.11e-27	13.71	2.8e-64	0.84
chr19-525	chr19	31887265	31887435	+	14	0.731	87.5	86	15.1	5.7	3.29e-36	8.58	1.35e-48	0.86
chrX-72	chrX	103546949	103547119	+	14	0.675	87.5	86	18.4	4.69	2.7e-30	15.19	8.24e-68	0.84
chr7-966	chr7	112439931	112440101	+	13.9	0.701	84	85	19.6	4.34	9.16e-28	9.58	2.13e-52	0.91
chr8-803	chr8	89234145	89234315	+	13.9	0.725	86.5	85	20	4.25	3.54e-27	17.69	2.95e-72	0.84
chr13-574	chr13	101849531	101849701	+	13.9	0.813	88	85	14.7	5.79	2.74e-36	8.58	9.09e-49	0.9
chr15-635	chr15	62255737	62255907	+	13.9	0.711	86	85	15.5	5.48	1.21e-34	7.65	4.63e-45	0.87
chr17-653	chr17	12935822	12935992	+	13.9	0.626	86	85	19.6	4.34	9.16e-28	4.55	1.2e-28	0.88
chr3-656	chr3	69649707	69649877	+	13.8	0.672	91.5	85	20	4.25	3.54e-27	10.81	1.43e-55	0.85
chr4-1005	chr4	70484233	70484403	+	13.8	0.793	86.5	85.5	17.5	4.87	5.94e-31	11.56	7.93e-58	0.84
chr5-955	chr5	146048342	146048512	+	13.8	0.838	85.5	84.5	17.5	4.82	2.89e-30	19.99	1.81e-76	0.9
chr10-840	chr10	99234452	99234622	+	13.8	0.669	85	85	17.5	4.85	5.94e-31	5.89	7.84e-36	0.87
chr19-552	chr19	29031935	29032105	+	13.8	0.675	84.5	84.5	18.8	4.5	2.5e-28	11.97	3.63e-59	0.86
chr2-992	chr2	110305791	110305961	+	13.8	0.589	84	84.5	18.8	4.5	2.5e-28	12.53	8.16e-60	0.87
chr5-971	chr5	122291944	122292114	+	13.8	0.569	84.5	84	11.4	7.35	2.69e-43	6.3	7.65e-38	0.92
chr11-1151	chr11	115292783	115292953	+	13.8	0.546	84	84	20.8	4.04	1.95e-25	4.08	3.01e-25	0.84
chr15-656	chr15	82641571	82641741	+	13.8	0.641	85	84.5	20.8	4.06	1.95e-25	4.08	1.1e-24	0.86
chr16-483	chr16	93742931	93743101	+	13.8	0.627	85.5	84	20	4.2	1.51e-26	7.34	3.01e-43	0.85
chr18-468	chr18	68299204	68299374	+	13.8	0.695	84	84	19.2	4.38	1.02e-27	6.49	9.35e-39	0.92
chr19-546	chr19	40089549	40089719	+	13.8	0.786	85	84	20.4	4.12	5.51e-26	8.81	2.45e-48	0.87
chr5-966	chr5	87346655	87346825	+	13.7	0.708	84.5	83.5	19.6	4.26	1.72e-26	10.02	1.81e-52	0.84
chr6-827	chr6	91583483	91583653	+	13.7	0.74	85.5	84	20	4.2	1.51e-26	8.76	1.44e-47	0.93
chr8-838	chr8	45304510	45304680	+	13.7	0.762	83.5	83.5	12.6	6.6	2.77e-39	16.8	7.42e-70	0.87
chr8-800	chr8	46362431	46362601	+	13.7	0.721	86.5	84.5	20.4	4.14	5.51e-26	7.32	1.88e-42	0.9
chr11-1117	chr11	53308315	53308485	+	13.7	0.689	85.5	83.5	20.8	4.01	7.89e-25	8.83	4.88e-48	0.86
chr12-539	chr12	75538148	75538318	+	13.7	0.76	88.5	83.5	15.9	5.25	2.09e-32	11.12	7.05e-56	0.88
chr2-1012	chr2	85250133	85250303	+	13.6	0.716	83	83	19.2	4.33	4.47e-27	8.7	1.44e-47	0.86
chr4-1070	chr4	38334859	38335029	+	13.6	0.638	83.5	83.5	18.4	4.55	2.7e-28	17.16	1.4e-70	0.85
chr4-1057	chr4	149305874	149306044	+	13.6	0.708	84.5	83	20	4.15	6.37e-26	4.52	7.97e-28	0.85
chr7-974	chr7	90020440	90020610	+	13.6	0.655	83.5	83	20.4	4.07	2.28e-25	8.6	1e-47	0.85
chr8-842	chr8	36713067	36713237	+	13.6	0.683	83	83.5	15.9	5.25	2.09e-32	11.25	1.87e-56	0.95
chr9-787	chr9	70241313	70241483	+	13.6	0.555	85.5	84	15.5	5.42	6.67e-34	4.44	9.35e-28	0.88
chr10-853	chr10	42715471	42715641	+	13.6	0.703	83.5	84	16.7	5.02	1.18e-31	7.86	3.4e-44	0.89
chr10-838	chr10	93162351	93162521	+	13.6	0.658	85	83	20	4.15	6.37e-26	6.62	6.4e-39	0.83
chr11-1166	chr11	45178072	45178242	+	13.6	0.681	83	83.5	17.9	4.65	6.26e-29	8.28	6.56e-45	0.85
chr11-1156	chr11	63881276	63881446	+	13.6	0.727	83.5	83	20.4	4.07	2.28e-25	5.94	1.14e-35	0.89
chr15-674	chr15	3455667	3455837	+	13.6	0.691	83.5	83	19.6	4.24	1.72e-26	9.08	1.78e-49	0.88
chr1-929	chr1	182460969	182461139	+	13.5	0.563	83.5	82.5	19.2	4.3	1.94e-26	9.35	7.63e-50	0.85
chr2-1022	chr2	65325806	65325976	+	13.5	0.717	82.5	82.5	18.4	4.49	1.23e-27	16.39	3.21e-68	0.91
chr4-1037	chr4	40155639	40155809	+	13.5	0.616	85	83	13.9	5.98	1.77e-36	5.3	2.73e-32	0.86
chr4-1135	chr4	139389712	139389882	+	13.5	0.71	80.5	83	19.6	4.24	1.72e-26	6.65	3.23e-39	0.89
chr19-555	chr19	32523038	32523208	+	13.5	0.674	84	82.5	20	4.13	2.65e-25	6.36	1.06e-37	0.85
chr7-992	chr7	102272707	102272877	+	13.4	0.707	82.5	82.5	20.4	4.05	9.31e-25	12.39	6.21e-59	0.88
chr10-881	chr10	61313757	61313927	+	13.4	0.656	82	82	16.3	5.03	5.84e-31	5.29	1.88e-32	0.88
chr13-612	chr13	95845078	95845248	+	13.4	0.695	84.5	82	19.6	4.19	7.31e-26	10.59	7.74e-54	0.9
chr15-668	chr15	62331206	62331376	+	13.4	0.715	84	82	14.3	5.74	7.66e-35	4.73	2.9e-29	0.85
chr18-482	chr18	75660147	75660317	+	13.4	0.677	82	82	20.4	4.02	9.31e-25	4.87	4.67e-30	0.86
chr5-929	chr5	87373215	87373385	+	13.4	0.654	86.5	81.5	15.5	5.26	1.03e-31	4.55	1.7e-27	0.85
chr5-1002	chr5	100369922	100370092	+	13.4	0.664	82.5	81.5	19.6	4.16	3.07e-25	7.71	1.45e-42	0.84
chr18-492	chr18	60213918	60214088	+	13.4	0.668	81	81.5	13.9	5.88	6.3e-35	6.36	2.92e-37	0.89
chr7-923	chr7	123193475	123193645	+	13.3	0.61	86.5	81	15.9	5.09	5.66e-31	7.44	3.52e-42	0.84
chr15-697	chr15	69044513	69044683	+	13.3	0.689	81	81	15.9	5.09	5.66e-31	10.66	5.97e-52	0.87
chr7-989	chr7	75498749	75498919	+	13.2	0.612	82.5	81	18.8	4.32	2.18e-26	13	7e-59	0.89
chr7-1013	chr7	96960518	96960688	+	13.2	0.651	81.5	80.5	18.8	4.29	9.46e-26	13.26	1.61e-59	0.87
chr10-875	chr10	111133434	111133604	+	13.2	0.652	82.5	81	19.2	4.22	8.34e-26	12.76	2.66e-58	0.86
chr10-889	chr10	125266086	125266256	+	13.2	0.662	82	81	13.5	6.02	8.39e-36	5.3	9.21e-32	0.85
chr11-1194	chr11	83271279	83271449	+	13.2	0.648	82	80.5	15.5	5.19	5.41e-31	10.33	1.4e-51	0.9
chr12-598	chr12	71934343	71934513	+	13.2	0.715	80	82	20.4	4.02	9.31e-25	6.91	4.29e-37	0.85
chr13-622	chr13	43478654	43478824	+	13.2	0.66	83.5	80.5	19.6	4.11	1.28e-24	5.88	9.85e-35	0.86
chr4-1097	chr4	97885748	97885918	+	13.1	0.682	82	82	17.5	4.68	6.59e-29	15.91	8.14e-65	0.88
chr6-856	chr6	128526743	128526913	+	13.1	0.544	83.5	80	19.6	4.09	1.28e-24	6.4	1.47e-36	0.86
chr8-942	chr8	36668379	36668549	+	13.1	0.752	77.5	80	15.9	5.03	2.89e-30	7.94	1.21e-43	0.95
chr10-891	chr10	19946787	19946957	+	13.1	0.7	81.5	80	18.4	4.36	2.44e-26	6.73	4.81e-38	0.89
chr13-687	chr13	63235645	63235815	+	13.1	0.727	79	80	20	4	4.45e-24	4.9	3.46e-29	0.91
chr15-678	chr15	39146800	39146970	+	13.1	0.658	83	80	12.6	6.33	7.6e-37	9.56	2.23e-47	0.83
chr15-698	chr15	86177236	86177406	+	13.1	0.635	81	80	17.5	4.56	1.43e-27	7.63	1.94e-42	0.88
chr16-479	chr16	55934655	55934825	+	13.1	0.602	85.5	80.5	19.6	4.11	1.28e-24	10.68	7.79e-53	0.88
chr17-725	chr17	69822999	69823169	+	13.1	0.656	80.5	80	18.4	4.36	2.44e-26	10.97	1.09e-53	1.03
chr1-942	chr1	67067469	67067639	+	13	0.62	82.5	80.5	17.9	4.49	6.03e-27	14.37	2.33e-61	0.85
chr3-770	chr3	84034471	84034641	+	13	0.697	81	79.5	19.6	4.06	5.23e-24	7.71	4.7e-42	0.89
chr6-861	chr6	67035497	67035667	+	13	0.764	83	80.5	20	4.03	4.45e-24	5.22	9.15e-31	0.87
chr8-883	chr8	93147470	93147640	+	13	0.767	81	81	16.7	4.84	1.46e-29	11.12	2.99e-53	0.98
chr16-518	chr16	49533488	49533658	+	13	0.657	82	79.5	18.4	4.33	1.07e-25	8.17	8.41e-44	0.81
chr4-1158	chr4	49408133	49408303	+	12.9	0.917	79	79	15.9	4.97	1.46e-29	17.3	1.59e-67	0.98
chr6-852	chr6	58740678	58740848	+	12.9	0.695	83.5	80.5	17.5	4.59	1.43e-27	17.46	8.88e-67	0.87
chr6-892	chr6	139847207	139847377	+	12.9	0.633	81	79	19.2	4.12	1.48e-24	11.69	3.8e-54	0.83
chr11-1203	chr11	100816965	100817135	+	12.9	0.601	81.5	79.5	15.5	5.13	2.8e-30	6.16	1.21e-35	0.85
chr13-652	chr13	101779161	101779331	+	12.9	0.688	81	79	17.1	4.61	1.53e-27	11.95	7.74e-55	0.92
chr4-1118	chr4	57285368	57285538	+	12.9	0.711	81	80	20	4	4.45e-24	5.88	7.17e-34	0.84
chr4-1137	chr4	144904109	144904279	+	12.9	0.644	80.5	80.5	15.9	5.06	2.89e-30	5.18	3.32e-30	0.85
chr8-839	chr8	111036762	111036932	+	12.9	0.684	83.5	79.5	18.8	4.24	4.05e-25	6.32	9.81e-36	0.89
chr9-843	chr9	82866191	82866361	+	12.9	0.755	82.5	78.5	18.8	4.18	1.71e-24	12.02	5.29e-55	0.96
chr13-690	chr13	36001214	36001384	+	12.9	0.598	78.5	78.5	17.9	4.37	1.19e-25	10.53	6.33e-51	0.87
chr13-669	chr13	114465507	114465677	+	12.9	0.72	80	78.5	18.4	4.28	4.6e-25	4.81	3.78e-28	0.92
chrX-95	chrX	42063735	42063905	+	12.9	0.723	79	78.5	15.5	5.06	1.43e-29	7.35	4.03e-40	0.85
chr2-1119	chr2	7260287	7260457	+	12.8	0.618	78	78	14.3	5.46	7.82e-32	14.77	1.12e-61	0.84
chr4-1176	chr4	86030168	86030338	+	12.8	0.663	78	78	15.5	5.03	1.43e-29	16.54	2.85e-65	0.94
chr5-1067	chr5	72653103	72653273	+	12.8	0.661	79	78	14.7	5.31	4.71e-31	8.99	1.52e-45	0.84
chr5-1088	chr5	89422487	89422657	+	12.8	0.732	78	78	13.9	5.62	1.22e-32	14.14	2.65e-60	0.85
chr11-1211	chr11	94602003	94602173	+	12.8	0.53	81	80.5	19.2	4.2	3.54e-25	5.86	8.5e-34	0.85
chr15-710	chr15	3449660	3449830	+	12.8	0.71	79.5	79.5	8.6	9.28	1.17e-47	8.26	4.69e-43	0.86
chr19-606	chr19	12696350	12696520	+	12.8	0.785	79	78.5	16.7	4.69	1.61e-27	11.99	3.98e-55	0.92
chr8-926	chr8	128488561	128488731	+	12.7	0.645	79	77.5	18.4	4.22	1.96e-24	5.9	2.25e-33	0.81
chr18-509	chr18	42554550	42554720	+	12.7	0.641	78.5	77.5	18.4	4.22	1.96e-24	19.84	5.31e-70	0.9
chr1-1004	chr1	82188570	82188740	+	12.6	0.643	79	77	18.4	4.19	1.96e-24	4.64	4.9e-27	0.85
chr2-1139	chr2	137554054	137554224	+	12.6	0.647	77.5	77	12.2	6.29	2.23e-35	18.24	1.1e-66	0.85
chr3-809	chr3	151899220	151899390	+	12.6	0.736	79	77	17.1	4.49	3.22e-26	15.74	4.18e-62	0.87
chr10-959	chr10	127945647	127945817	+	12.6	0.642	77.5	77.5	18.4	4.22	1.96e-24	7.73	2.74e-41	0.85
chr16-543	chr16	65977133	65977303	+	12.6	0.732	80	78	17.9	4.35	1.19e-25	25.34	7.85e-77	0.84
chr17-740	chr17	26593339	26593509	+	12.6	0.566	79	77	14.3	5.39	4.28e-31	4.71	1.87e-27	0.85
chr1-995	chr1	75147742	75147912	+	12.5	0.534	79.5	76.5	13.5	5.68	5.91e-32	4.69	4.96e-27	0.85
chr3-777	chr3	138410224	138410394	+	12.5	0.662	81	76.5	17.5	4.36	5.82e-25	7.38	3.02e-39	0.93
chr9-906	chr9	80256650	80256820	+	12.5	0.685	78.5	77	18.4	4.19	1.96e-24	12.51	7.45e-55	0.85
chr10-947	chr10	125328423	125328593	+	12.5	0.627	78	76.5	16.3	4.69	7.96e-27	6.73	1.24e-36	0.85
chr10-948	chr10	127156297	127156467	+	12.5	0.749	78	78	13.9	5.62	1.22e-32	8.3	1.25e-42	0.85
chr17-726	chr17	35815947	35816117	+	12.5	0.706	80	76.5	17.9	4.26	2.24e-24	6.03	1.44e-33	0.92
chr19-619	chr19	46706937	46707107	+	12.5	0.659	78.5	77	18.8	4.1	7.14e-24	8.61	1.01e-43	0.85
chr3-782	chr3	82022641	82022811	+	12.5	0.597	80.5	77.5	11	7.04	2.23e-38	7.77	6.22e-41	0.86
chr10-909	chr10	61137655	61137825	+	12.5	0.713	80	76.5	18.8	4.08	2.94e-23	14.09	9.72e-58	0.88
chr18-506	chr18	16735856	16736026	+	12.5	0.748	78.5	76	17.1	4.44	1.45e-25	5.43	6.76e-31	0.87
chr3-831	chr3	69543880	69544050	+	12.4	0.778	77	75.5	16.3	4.63	3.72e-26	6.79	3.64e-36	0.94
chr4-1191	chr4	138464772	138464942	+	12.4	0.626	77.5	76	18.4	4.14	8.27e-24	5.73	9.39e-32	0.88
chr13-715	chr13	47183174	47183344	+	12.4	0.636	77	75.5	18.8	4.02	1.2e-22	6.84	1.25e-36	0.88
chrX-94	chrX	85877848	85878018	+	12.4	0.749	79.5	75.5	11.4	6.61	1.11e-35	12.88	5.04e-55	0.89
chr6-1030	chr6	129213587	129213757	+	12.3	0.699	73.5	75	17.9	4.18	9.51e-24	5.83	7.46e-32	0.94
chr7-1081	chr7	114321979	114322149	+	12.3	0.638	77	75	13.5	5.57	3.35e-31	4.79	3.34e-27	0.86
chr10-952	chr10	68354504	68354674	+	12.3	0.641	77.5	75.5	13.5	5.61	3.35e-31	5.93	1.76e-32	0.86
chr11-1327	chr11	112038836	112039006	+	12.3	0.624	76.5	75	15.9	4.71	8.32e-27	15.65	3.96e-61	0.85
chr17-790	chr17	64767640	64767810	+	12.3	0.687	75	75	15.1	4.97	3.58e-28	5.23	5.79e-29	0.85
chr19-651	chr19	3225399	3225569	+	12.3	0.86	75	75	14.3	5.25	1.24e-29	31.35	9.76e-83	0.91
chr4-1201	chr4	53108319	53108489	+	12.2	0.69	77	76	15.9	4.78	1.74e-27	9.9	1.31e-46	0.87
chr6-954	chr6	128525903	128526073	+	12.2	0.659	77.5	76	18.8	4.05	2.94e-23	5.8	1.09e-31	0.86
chr9-957	chr9	53607304	53607474	+	12.2	0.683	75.5	76	15.1	5.04	7.09e-29	5.05	3.03e-28	0.85
chr14-568	chr14	118124882	118125052	+	12.2	0.69	79.5	74.5	16.3	4.57	1.72e-25	7.62	3.73e-39	0.88
chr5-1156	chr5	122280221	122280391	+	12.1	0.774	74	74	17.1	4.32	2.85e-24	7.6	9.04e-39	0.88
chr7-1125	chr7	14308767	14308937	+	12.1	0.701	74.5	74	15.9	4.65	3.94e-26	8.85	1.39e-43	0.9
chr13-760	chr13	114681345	114681515	+	12.1	0.69	74	74.5	17.5	4.25	1.09e-23	6.21	4.32e-33	0.88
chr19-610	chr19	58430813	58430983	+	12.1	0.613	79	74	17.5	4.22	1.09e-23	8.32	8.34e-42	0.87
chr1-1095	chr1	51856842	51857012	+	12	0.559	74	73.5	15.1	4.87	8.78e-27	7.28	1.34e-37	0.93
chr3-854	chr3	122421866	122422036	+	12	0.643	76	74	15.9	4.65	3.94e-26	4.75	2.53e-26	0.84
chr6-1029	chr6	129161281	129161451	+	12	0.8	73.5	74.5	17.5	4.25	1.09e-23	7.34	4.1e-37	0.93
chr11-1360	chr11	95462277	95462447	+	12	0.685	75	73.5	16.3	4.5	7.81e-25	10.36	1.71e-47	0.9
chr14-606	chr14	122511638	122511808	+	12	0.679	76	73.5	14.3	5.15	3.39e-28	13.69	1.35e-55	0.88
chr17-802	chr17	28446240	28446410	+	12	0.642	73.5	73.5	13.9	5.3	6.1e-29	6.6	6.33e-35	0.86
chr4-1215	chr4	53826857	53827027	+	12	0.688	76	73	16.3	4.47	7.81e-25	4.12	2.43e-22	0.87
chr6-1034	chr6	34725829	34725999	+	12	0.672	73	73	15.5	4.71	4.12e-26	6.55	4.39e-34	0.84
chr7-1086	chr7	46732547	46732717	+	12	0.691	76.5	73	16.3	4.47	7.81e-25	7.66	5.69e-39	0.84
chr11-1284	chr11	6442662	6442832	+	12	0.714	77.5	73	13.5	5.42	1.03e-29	4.18	9.87e-23	0.91
chr14-680	chr14	27667525	27667695	+	12	0.706	70	73	17.1	4.26	1.23e-23	13.87	5.55e-56	0.98
chr1-1131	chr1	133329181	133329351	+	11.9	0.597	72.5	72.5	16.7	4.34	1.39e-23	8.18	2.88e-40	0.86
chr3-857	chr3	14774648	14774818	+	11.9	0.71	75.5	72.5	15.5	4.68	1.95e-25	16.15	1.75e-59	0.84
chr5-1153	chr5	64745076	64745246	+	11.9	0.742	74	73	17.1	4.26	1.23e-23	8.76	5.52e-42	0.84
chr6-1040	chr6	97282552	97282722	+	11.9	0.652	72.5	72.5	10.6	6.84	3.26e-35	5.55	5.96e-29	0.84
chr10-977	chr10	125269376	125269546	+	11.9	0.721	76.5	72.5	17.9	4.04	6.75e-22	4.61	4.58e-25	0.89
chr12-664	chr12	80793797	80793967	+	11.9	0.682	74	72.5	12.6	5.73	1.39e-30	5.53	1.18e-29	0.87
chr2-1236	chr2	137062253	137062423	+	11.8	0.688	73	72.5	16.3	4.44	3.51e-24	15.34	3.52e-57	0.84
chr8-1005	chr8	40861572	40861742	+	11.8	0.595	73	73	14.7	4.97	1.77e-27	4.03	5.57e-22	0.88
chr12-632	chr12	84610258	84610428	+	11.8	0.76	76.5	72	13.5	5.35	5.61e-29	10.18	2.26e-46	0.88
chrX-120	chrX	169106085	169106255	+	11.8	0.651	73.5	73.5	18.4	4	5.71e-22	18.73	4.76e-64	0.89
chr1-1153	chr1	139860330	139860500	+	11.7	0.665	71.5	71.5	17.5	4.08	7.94e-22	7.31	5.04e-36	0.85
chr14-621	chr14	59445569	59445739	+	11.7	0.781	75	72.5	14.7	4.94	8.85e-27	4.88	3.92e-26	0.92
chr15-793	chr15	97019436	97019606	+	11.7	0.59	74	72	16.7	4.31	1.39e-23	4.34	2.81e-23	0.85
chr17-786	chr17	5261489	5261659	+	11.7	0.741	75	72.5	13.9	5.23	3.22e-28	10.12	5.63e-45	0.91
chr18-583	chr18	3420822	3420992	+	11.7	0.7	71.5	71.5	9.8	7.3	1.69e-36	10.3	6.97e-46	0.88
chr18-518	chr18	53863914	53864084	+	11.7	0.63	77.5	71.5	12.2	5.84	1.15e-30	4.61	6.24e-25	0.88
chr4-1325	chr4	102588328	102588498	+	11.6	0.669	71	71	17.1	4.14	2.23e-22	6.41	2.41e-32	0.86
chr8-1035	chr8	89208017	89208187	+	11.6	0.687	71	71	17.5	4.05	7.94e-22	11.15	1.93e-47	0.89
chr13-771	chr13	35023495	35023665	+	11.6	0.719	73	72	16.3	4.41	3.51e-24	8.68	2.32e-41	0.9
chr14-648	chr14	100412290	100412460	+	11.6	0.752	72.5	71	14.7	4.83	4.35e-26	18.25	2.22e-61	0.9
chr16-612	chr16	37864511	37864681	+	11.6	0.776	72.5	71	17.1	4.14	2.23e-22	6.44	2.26e-33	0.93
chr16-614	chr16	49532213	49532383	+	11.6	0.659	72.5	71	16.3	4.35	1.55e-23	6.86	4.84e-35	0.86
chr18-570	chr18	9833406	9833576	+	11.6	0.741	73	71	17.1	4.14	2.23e-22	15.2	3.98e-57	0.85
chr19-701	chr19	46728000	46728170	+	11.6	0.568	72	72	17.5	4.1	1.92e-22	6.31	7.66e-33	0.89
chr1-1122	chr1	74058829	74058999	+	11.6	0.574	72.5	71	17.1	4.14	2.23e-22	4.62	1.87e-24	0.87
chr3-917	chr3	85273494	85273664	+	11.6	0.733	72	70.5	15.9	4.43	1.72e-23	6.7	9.03e-34	0.89
chr4-1317	chr4	11089346	11089516	+	11.6	0.631	71	70.5	9	7.86	6.19e-38	4.49	8.43e-24	0.85
chr8-994	chr8	70194321	70194491	+	11.6	0.678	74	70.5	14.3	4.94	4.39e-26	4.78	2.56e-25	0.85
chr8-1051	chr8	125984257	125984427	+	11.6	0.679	70.5	70.5	17.1	4.12	9.28e-22	12.66	5.42e-51	0.87
chr9-1054	chr9	70208880	70209050	+	11.6	0.626	70.5	70.5	10.2	6.91	1.43e-34	4.47	1.53e-23	0.88
chr10-1055	chr10	68435946	68436116	+	11.6	0.592	71	70.5	14.3	4.94	4.39e-26	7.06	4.06e-35	0.85
chr15-844	chr15	55557377	55557547	+	11.6	0.595	70.5	70.5	12.6	5.58	4.46e-29	12.64	5.99e-51	0.88
chr15-850	chr15	91049002	91049172	+	11.6	0.65	70.5	71	14.7	4.83	4.35e-26	4.04	1.74e-21	0.88
chr19-711	chr19	56533795	56533965	+	11.6	0.674	71.5	70.5	16.3	4.32	6.79e-23	5.56	5.09e-29	0.85
chr1-1136	chr1	60563138	60563308	+	11.5	0.786	72	70	13.9	5.05	8.62e-27	4.45	9.23e-24	0.87
chr1-1110	chr1	84241271	84241441	+	11.5	0.588	73	70.5	14.7	4.8	2.11e-25	12.11	4.8e-49	0.84
chr3-937	chr3	54517357	54517527	+	11.5	0.641	70.5	70	15.5	4.52	4.17e-24	13.02	5.65e-52	0.86
chr3-1015	chr3	121264285	121264455	+	11.5	0.785	66	70	16.7	4.19	2.56e-22	5.08	6.18e-27	0.98
chr4-1329	chr4	145087763	145087933	+	11.5	0.783	71	70	15.9	4.4	1.72e-23	14.53	4.64e-55	0.88
chr4-1315	chr4	150457454	150457624	+	11.5	0.739	71.5	70.5	16.3	4.32	6.79e-23	8.5	3.19e-40	0.84
chr5-1233	chr5	66062955	66063125	+	11.5	0.618	70.5	70	14.3	4.9	4.39e-26	4.17	3.06e-22	0.87
chr6-1046	chr6	90501719	90501889	+	11.5	0.724	72	70.5	16.7	4.22	2.56e-22	7.26	4.77e-36	0.95
chr9-1018	chr9	77722491	77722661	+	11.5	0.712	72.5	70.5	16.3	4.32	6.79e-23	5.46	9.91e-29	0.87
chr14-655	chr14	11759151	11759321	+	11.5	0.622	71.5	71.5	16.7	4.28	6.01e-23	8.27	1.7e-39	0.85
chr19-709	chr19	44057193	44057363	+	11.5	0.647	71.5	70.5	15.1	4.67	9.63e-25	12.27	2.66e-50	0.85
chr1-1171	chr1	88070562	88070732	+	11.4	0.676	70.5	69.5	12.6	5.5	2.48e-28	6.9	3.16e-34	0.91
chr1-1196	chr1	151328825	151328995	+	11.4	0.729	69.5	69.5	13.9	5.01	4.36e-26	8.1	2.05e-38	0.87
chr1-1180	chr1	193287688	193287858	+	11.4	0.68	70.5	70.5	12.2	5.76	6.71e-30	5.47	3.29e-28	0.86
chr5-1264	chr5	130009871	130010041	+	11.4	0.598	69.5	69.5	16.7	4.16	1.08e-21	4.43	2.49e-23	0.88
chr8-1032	chr8	46514097	46514267	+	11.4	0.645	71	69.5	17.1	4.06	3.81e-21	10.2	2.21e-44	0.86
chr12-704	chr12	44269563	44269733	+	11.4	0.545	71	69.5	14.7	4.73	1.01e-24	4.43	3.67e-23	0.9
chr14-661	chr14	25790795	25790965	+	11.4	0.622	71	69.5	15.1	4.6	4.49e-24	7.4	4.84e-36	0.87
chr3-955	chr3	79086287	79086457	+	11.3	0.65	69.5	69	11.8	5.83	5.54e-30	5.37	6.32e-28	0.9
chr6-1090	chr6	55190124	55190294	+	11.3	0.698	69.5	69.5	14.7	4.73	1.01e-24	8.03	3.56e-38	0.91
chr6-1096	chr6	72263923	72264093	+	11.3	0.725	69	69	14.3	4.83	2.16e-25	7.99	4.84e-38	0.88
chr11-1424	chr11	60796016	60796186	+	11.3	0.61	72.5	69	13.9	4.98	4.36e-26	8.19	4.19e-37	0.86
chr4-1375	chr4	59222389	59222559	+	11.2	0.721	69	68.5	14.7	4.66	4.77e-24	11.38	7.01e-47	0.91
chr5-1256	chr5	87080829	87080999	+	11.2	0.74	69.5	69	13.5	5.13	8.3e-27	15.88	8.62e-56	0.85
chr5-1252	chr5	117981045	117981215	+	11.2	0.7	70	68.5	11.4	6	4.45e-30	4.65	3.92e-24	0.88
chr19-723	chr19	37213846	37214016	+	11.2	0.682	70.5	69.5	14.7	4.73	1.01e-24	7.27	6.54e-35	0.85
chr4-1419	chr4	62027859	62028029	+	11.1	0.768	67	68	14.3	4.76	1.05e-24	7.27	4.47e-35	1
chr3-968	chr3	60576538	60576708	+	11.1	0.691	68.5	67.5	14.3	4.73	5.01e-24	14.26	2.77e-52	0.94
chr6-1088	chr6	145469411	145469581	+	11.1	0.661	70	68	14.7	4.63	4.77e-24	11.69	9.93e-47	0.88
chr7-1172	chr7	14446696	14446866	+	11.1	0.701	72	67.5	14.3	4.73	5.01e-24	12.3	4.33e-48	0.9
chr11-1556	chr11	109733170	109733340	+	11.1	0.636	67.5	67.5	13.1	5.17	4.11e-26	6.46	1.85e-31	0.88
chr19-742	chr19	38364090	38364260	+	11.1	0.676	69	68.5	16.3	4.2	1.24e-21	9.02	6.23e-40	0.85
chr19-761	chr19	55150324	55150494	+	11.1	0.732	68	68	15.9	4.27	3.32e-22	7.3	1.61e-34	0.85
chr1-1230	chr1	57388943	57389113	+	11	0.698	67.5	67	11	6.08	3.47e-30	9.28	7.46e-41	0.91
chr3-987	chr3	97275029	97275199	+	11	0.689	67.5	67.5	15.9	4.24	1.42e-21	11.33	3.11e-45	0.84
chr4-1395	chr4	49503623	49503793	+	11	0.694	68	67	12.2	5.48	1.21e-27	5.2	2.09e-26	0.9
chr8-1088	chr8	46830179	46830349	+	11	0.635	68.5	67.5	16.3	4.14	5.2e-21	8.6	3.89e-38	0.86
chr10-1105	chr10	69190653	69190823	+	11	0.611	68	67	14.3	4.69	5.01e-24	7.57	1.3e-35	0.88
chr13-842	chr13	101351249	101351419	+	11	0.695	69	67	11.8	5.66	1.87e-28	11.08	1.62e-45	0.85
chr18-607	chr18	5686279	5686449	+	11	0.634	68.5	67	9	7.47	2.83e-35	10.86	1.08e-43	0.89
chr19-769	chr19	36629583	36629753	+	11	0.677	67.5	67	9.8	6.84	4.32e-33	7.98	5.71e-37	0.84
chr19-791	chr19	39285715	39285885	+	11	0.745	66	67.5	15.1	4.47	9.31e-23	7.17	1.37e-33	1
chr19-731	chr19	40432144	40432314	+	11	0.692	70	67	15.5	4.32	3.73e-22	7.63	7.77e-36	0.85
chr2-1322	chr2	5061376	5061546	+	10.9	0.639	68.5	66.5	9	7.41	2.12e-34	5.91	4.59e-29	0.89
chr3-993	chr3	18463483	18463653	+	10.9	0.736	67	66.5	13.9	4.79	5.2e-24	8.36	1.34e-37	1.06
chr9-1100	chr9	57687765	57687935	+	10.9	0.653	68.5	66.5	14.7	4.53	1.02e-22	5.25	4.4e-26	0.87
chr11-1518	chr11	16784002	16784172	+	10.9	0.636	68.5	67	15.5	4.32	3.73e-22	7.54	7.89e-35	0.88
chr11-1561	chr11	75494807	75494977	+	10.9	0.717	67	66.5	13.5	4.94	1.08e-24	6.87	1.58e-32	0.89
chr14-697	chr14	8264480	8264650	+	10.9	0.743	68.5	67.5	14.7	4.6	2.22e-23	6.28	2.37e-30	0.91
chr16-657	chr16	43341994	43342164	+	10.9	0.731	69	66.5	11.8	5.62	1.06e-27	12.02	8.53e-47	0.89
chr19-775	chr19	20744772	20744942	+	10.9	0.667	67	67	16.7	4.01	1.82e-20	15.14	6.41e-53	0.87
chr2-1343	chr2	23075988	23076158	+	10.8	0.668	68	66	15.1	4.37	4.15e-22	6.23	2.37e-30	0.93
chr4-1451	chr4	131887430	131887600	+	10.8	0.686	66	66	11.4	5.78	1.56e-28	7.08	8.82e-33	0.87
chr5-1294	chr5	51039861	51040031	+	10.8	0.668	68	68	13.9	4.9	2.18e-25	12.95	5.89e-49	0.88
chr5-1335	chr5	96996629	96996799	+	10.8	0.637	66.5	66	16.3	4.05	2.15e-20	4.49	1.07e-22	0.9
chr6-1120	chr6	59070556	59070726	+	10.8	0.677	67.5	66	10.6	6.22	2.62e-30	9.52	6.32e-41	0.86
chr7-1289	chr7	141423888	141424058	+	10.8	0.735	66	66	13.9	4.76	5.2e-24	5.15	2.65e-25	0.89
chr9-1120	chr9	48284229	48284399	+	10.8	0.613	67.5	66	14.7	4.49	1.02e-22	8.67	1.54e-38	0.92
chr9-1124	chr9	68888142	68888312	+	10.8	0.693	67	66	14.7	4.49	1.02e-22	5.62	6.86e-28	0.89
chr12-769	chr12	71136685	71136855	+	10.8	0.58	66	66	13.9	4.76	5.2e-24	8.38	1.1e-37	0.93
chr12-756	chr12	84034294	84034464	+	10.8	0.751	67	66.5	9	7.41	2.12e-34	5.34	1.1e-26	0.94
chr13-825	chr13	69631792	69631962	+	10.8	0.713	70	67	16.3	4.11	5.2e-21	6.86	1.11e-32	1
chr14-721	chr14	78895671	78895841	+	10.8	0.693	67	66.5	13.5	4.94	1.08e-24	10.17	5.3e-42	0.85
chrX-140	chrX	101379829	101379999	+	10.8	0.665	68.5	67.5	13.5	5.01	2.17e-25	6.72	1.53e-31	0.9
chr3-999	chr3	94686505	94686675	+	10.7	0.786	67	65.5	13.5	4.87	5.32e-24	4.04	1.25e-19	0.92
chr3-1009	chr3	119514403	119514573	+	10.7	0.671	66.5	65.5	13.9	4.72	2.48e-23	15.72	3.88e-53	0.85
chr4-1430	chr4	43624535	43624705	+	10.7	0.78	66.5	66	15.5	4.26	1.62e-21	7.05	1.09e-32	0.87
chr5-1327	chr5	145904644	145904814	+	10.7	0.796	67	65.5	15.1	4.34	1.82e-21	4.92	2.86e-24	0.86
chr8-1122	chr8	34794299	34794469	+	10.7	0.712	66.5	65.5	16.3	4.01	8.72e-20	6.96	6.88e-32	0.85
chr14-727	chr14	17681667	17681837	+	10.7	0.738	66	65.5	15.1	4.34	1.82e-21	12.2	1.67e-46	0.86
chr16-700	chr16	24061582	24061752	+	10.7	0.662	65.5	65.5	16.3	4.01	8.72e-20	6.21	1.18e-29	0.86
chr19-782	chr19	9090860	9091030	+	10.7	0.613	66.5	66.5	12.2	5.43	6.67e-27	7.42	6.26e-34	0.85
chr9-1154	chr9	48585550	48585720	+	10.7	0.708	65.5	65	13.5	4.83	5.32e-24	8.87	1.46e-38	0.9
chr10-1120	chr10	40519625	40519795	+	10.7	0.648	67	65.5	12.2	5.35	3.61e-26	7.65	7.25e-35	0.88
chr11-1624	chr11	86871996	86872166	+	10.7	0.665	65	65	11.4	5.69	9.07e-28	7.58	1.22e-34	0.85
chr2-1399	chr2	109487712	109487882	+	10.6	0.772	65.5	64.5	15.1	4.27	7.89e-21	14.43	2.57e-50	0.96
chr3-1044	chr3	52529282	52529452	+	10.6	0.584	64.5	64.5	14.3	4.52	5.01e-22	4.15	6.68e-20	0.85
chr7-1328	chr7	101915557	101915727	+	10.6	0.68	64.5	64.5	15.1	4.27	7.89e-21	10.62	2.72e-42	0.86
chr15-913	chr15	103281379	103281549	+	10.6	0.588	66.5	64.5	15.9	4.05	1.03e-19	5.95	5.53e-28	0.86
chr17-931	chr17	32282039	32282209	+	10.6	0.71	65	64.5	15.5	4.16	2.91e-20	5.03	2.08e-24	0.88
chr6-1128	chr6	5171608	5171778	+	10.5	0.636	67	64	13.9	4.61	1.17e-22	8.73	1.39e-37	0.89
chr6-1149	chr6	47781472	47781642	+	10.5	0.644	66	64	15.1	4.24	7.89e-21	7.11	1.36e-32	0.87
chr6-1136	chr6	139849963	139850133	+	10.5	0.694	67	64.5	12.6	5.1	1.05e-24	7.2	3.18e-32	0.87
chr7-1230	chr7	29908562	29908732	+	10.5	0.541	69	64	14.7	4.36	2.04e-21	5.72	1.67e-26	0.87
chr15-938	chr15	55130482	55130652	+	10.5	0.662	64.5	64	11	5.81	7.53e-28	4.85	2.97e-23	1
chr3-1068	chr3	60604237	60604407	+	10.4	0.792	63	63.5	15.5	4.1	1.21e-19	12.44	8.24e-46	0.94
chr5-1343	chr5	92773631	92773801	+	10.4	0.62	66	63.5	12.6	5.02	5.34e-24	9.32	1.93e-38	0.88
chr5-1349	chr5	143396764	143396934	+	10.4	0.706	66	64	14.7	4.36	2.04e-21	6.01	5.07e-28	0.86
chr5-1390	chr5	148548666	148548836	+	10.4	0.71	64.5	63.5	14.3	4.45	2.26e-21	4.21	3.36e-20	0.83
chr6-1186	chr6	108092821	108092991	+	10.4	0.701	64.5	63.5	14.7	4.32	8.92e-21	6.64	1.58e-30	0.91
chr7-1280	chr7	126477802	126477972	+	10.4	0.676	66.5	64.5	14.7	4.39	2.04e-21	4.03	1.91e-19	0.87
chr10-1183	chr10	57494040	57494210	+	10.4	0.78	63.5	63.5	10.2	6.23	7.67e-29	13.27	3.07e-47	0.93
chr13-913	chr13	95810920	95811090	+	10.4	0.694	64.5	63.5	14.3	4.45	2.26e-21	8.31	1.17e-35	0.87
chr13-923	chr13	101694629	101694799	+	10.4	0.639	64	63.5	15.1	4.21	3.36e-20	4.18	4.55e-20	0.84
chr19-821	chr19	34756663	34756833	+	10.4	0.649	64.5	63.5	15.1	4.21	3.36e-20	5.96	7.47e-28	0.9
chr19-811	chr19	46459996	46460166	+	10.4	0.665	65	63.5	15.1	4.21	3.36e-20	5.25	8.87e-25	0.88
chr2-1429	chr2	134844691	134844861	+	10.3	0.577	64.5	63.5	13.9	4.58	5.42e-22	5.78	2.45e-27	0.93
chr9-1203	chr9	110345457	110345627	+	10.3	0.723	63	63	14.7	4.29	8.92e-21	6.75	6.78e-31	0.87
chr15-961	chr15	58900647	58900817	+	10.3	0.691	63	63.5	11.4	5.56	2.91e-26	8.13	1.4e-34	0.91
chr17-955	chr17	5075231	5075401	+	10.3	0.683	63.5	63	11	5.72	4.39e-27	9.7	1.36e-39	0.89
chr18-649	chr18	46641713	46641883	+	10.3	0.754	64.5	64	12.2	5.23	1.92e-25	4.11	7.06e-20	0.9
chr18-690	chr18	60225561	60225731	+	10.3	0.797	62	63	12.6	4.98	5.34e-24	9.99	1.57e-39	1.03
chr2-1477	chr2	152785683	152785853	+	10.2	0.57	62.5	62.5	15.1	4.14	1.41e-19	5.24	3.36e-24	0.91
chr7-1373	chr7	135043829	135043999	+	10.2	0.673	62.5	62.5	10.6	5.89	3.62e-27	8.76	2.29e-36	0.88
chr8-1205	chr8	48535934	48536104	+	10.2	0.741	62.5	62.5	12.6	4.94	2.67e-23	14.43	8.39e-49	0.91
chr8-1099	chr8	114716629	114716799	+	10.2	0.693	68	62.5	13.9	4.51	2.47e-21	12.9	8.35e-46	0.92
chr8-1181	chr8	124924118	124924288	+	10.2	0.574	64	62.5	13.9	4.51	2.47e-21	5.26	1.24e-24	0.9
chr5-1410	chr5	122313132	122313302	+	10.2	0.633	63.5	62	13.5	4.61	5.79e-22	4.05	2.92e-19	0.87
chr6-1183	chr6	38825993	38826163	+	10.2	0.797	64.5	62	12.2	5.07	5.22e-24	7.58	3.9e-33	0.91
chr6-1220	chr6	141944096	141944266	+	10.2	0.664	63	62.5	13.5	4.64	5.79e-22	6.72	2.41e-30	0.86
chr8-1169	chr8	56233899	56234069	+	10.2	0.751	64.5	62	7.8	8	2.14e-34	4.98	1.18e-23	0.94
chr10-1203	chr10	110919113	110919283	+	10.2	0.595	63	62	12.6	4.9	2.67e-23	4.78	9.67e-23	0.89
chr15-976	chr15	57880940	57881110	+	10.2	0.722	62	62	14.7	4.22	3.84e-20	9.81	1.81e-38	0.9
chr16-723	chr16	42911461	42911631	+	10.2	0.625	64.5	62	12.6	4.9	2.67e-23	5.58	4.07e-26	0.87
chr18-639	chr18	7895148	7895318	+	10.2	0.723	65.5	62	11.4	5.43	1.61e-25	13.27	1.03e-46	0.88
chr3-1052	chr3	58577755	58577925	+	10.1	0.685	64	61.5	13.5	4.57	2.68e-21	6.19	7.59e-28	0.85
chr4-1504	chr4	141163241	141163411	+	10.1	0.679	63.5	62	11	5.63	2.52e-26	9.51	6.02e-38	0.89
chr5-1389	chr5	145431137	145431307	+	10.1	0.709	64.5	61.5	13.9	4.43	1.11e-20	11.87	2.97e-43	0.89
chr8-1220	chr8	48517537	48517707	+	10.1	0.633	62	61.5	10.6	5.8	2.13e-26	13.64	1.15e-46	0.9
chr13-961	chr13	81367898	81368068	+	10.1	0.651	62	62	11.8	5.24	9.51e-25	8.45	6.02e-35	0.85
chr18-692	chr18	37927930	37928100	+	10.1	0.769	61.5	61.5	11.4	5.38	8.77e-25	8.39	8.84e-35	0.86
chr2-1489	chr2	50273605	50273775	+	10	0.756	62	62	14.7	4.22	3.84e-20	12.89	2.83e-45	0.86
chr2-1479	chr2	160805314	160805484	+	10	0.614	62.5	61.5	11.8	5.2	5e-24	8.63	1.25e-35	0.89
chr4-1496	chr4	97765630	97765800	+	10	0.575	63.5	61	14.3	4.27	4.36e-20	9.07	8.12e-37	0.89
chr6-1202	chr6	6185802	6185972	+	10	0.626	63.5	63	15.5	4.06	1.21e-19	5.61	1.82e-25	0.87
chr6-1227	chr6	72465828	72465998	+	10	0.584	62.5	61.5	12.6	4.86	1.31e-22	7.01	7.74e-31	0.87
chr6-1269	chr6	114938296	114938466	+	10	0.593	61	62	13.1	4.75	1.28e-22	6.7	7.22e-29	0.87
chr7-1384	chr7	67652308	67652478	+	10	0.679	62	61	13.9	4.4	1.11e-20	7.18	2.28e-31	0.86
chr9-1230	chr9	114830442	114830612	+	10	0.66	62	61	15.1	4.04	5.82e-19	5.95	3.71e-27	0.86
chr10-1225	chr10	67107785	67107955	+	10	0.602	61.5	61.5	11.8	5.2	5e-24	4.83	1.2e-22	0.87
chr13-949	chr13	23736213	23736383	+	10	0.758	62.5	61	14.7	4.15	1.63e-19	4.46	3.44e-20	0.87
chr14-770	chr14	21034062	21034232	+	10	0.631	63	61	8.2	7.48	2.63e-32	8.94	1.75e-36	0.88
chr18-676	chr18	60215436	60215606	+	10	0.714	63	61	9.4	6.5	3.99e-29	4.96	3.41e-23	0.9
chr19-876	chr19	32374391	32374561	+	10	0.687	61	61	13.1	4.67	6.11e-22	10.13	1.9e-39	0.89
chr2-1474	chr2	103511218	103511388	+	9.92	0.659	62.5	60.5	10.2	5.93	1.74e-26	5.05	4.74e-23	0.87
chr10-1211	chr10	95583043	95583213	+	9.92	0.682	62.5	61	14.7	4.15	1.63e-19	11.97	1.38e-42	0.89
chr1-1396	chr1	62053156	62053326	+	9.83	0.736	60	60.5	12.6	4.78	6.37e-22	17.98	9.03e-51	0.92
chr4-1515	chr4	126091999	126092169	+	9.83	0.703	63	63	13.1	4.83	2.64e-23	4.35	3.84e-20	0.89
chr10-1193	chr10	111139977	111140147	+	9.83	0.676	63.5	60.5	14.3	4.24	1.87e-19	10	1.65e-38	0.89
chr13-908	chr13	37904576	37904746	+	9.83	0.72	64.5	60	11	5.45	7.91e-25	8.89	9.08e-36	0.91
chr14-773	chr14	59423394	59423564	+	9.83	0.695	63	60	14.3	4.2	1.87e-19	9.47	2.97e-37	0.9
chr14-804	chr14	114074091	114074261	+	9.83	0.626	60.5	60	13.1	4.6	2.87e-21	14.16	7.77e-47	0.86
chr15-987	chr15	31550468	31550638	+	9.83	0.792	61.5	60.5	10.2	5.93	1.74e-26	9.77	5.68e-38	0.9
chr16-727	chr16	76347965	76348135	+	9.83	0.576	64	60.5	14.3	4.24	1.87e-19	5.59	2.23e-25	0.91
chr2-1560	chr2	135296485	135296655	+	9.75	0.675	60	59.5	14.7	4.05	2.8e-18	18.34	4.28e-52	0.95
chr5-1482	chr5	139198879	139199049	+	9.75	0.653	61	59.5	12.6	4.71	3.03e-21	5.06	1e-22	0.87
chr13-927	chr13	45637696	45637866	+	9.75	0.658	63.5	60	9.8	6.13	2.24e-27	10.91	9.94e-40	0.88
chr16-761	chr16	31493163	31493333	+	9.75	0.607	61.5	59.5	10.6	5.61	6.96e-25	5.21	2.48e-23	0.88
chr19-899	chr19	39282964	39283134	+	9.75	0.688	59.5	59.5	9.4	6.34	1.67e-27	7.83	3.91e-32	0.88
chr1-1367	chr1	51770136	51770306	+	9.67	0.611	61.5	59.5	11.8	5.03	1.32e-22	9.46	1.26e-36	0.89
chr2-1543	chr2	49090846	49091016	+	9.67	0.726	60.5	59	13.9	4.25	2.13e-19	14.28	2.8e-46	0.89
chr5-1535	chr5	63928532	63928702	+	9.67	0.602	58.5	59.5	10.2	5.83	1.03e-25	8.77	2.43e-34	0.94
chr5-1499	chr5	151177293	151177463	+	9.67	0.779	60.5	59	13.9	4.25	2.13e-19	6.77	4.17e-29	0.91
chr6-1184	chr6	72104635	72104805	+	9.67	0.679	64.5	60	6.5	9.19	1.5e-36	8.9	3.11e-35	0.89
chr6-1273	chr6	143513576	143513746	+	9.67	0.73	61	60.5	14.3	4.24	1.87e-19	12.18	1.67e-42	0.9
chr7-1423	chr7	26962518	26962688	+	9.67	0.663	60.5	59	11	5.36	4.33e-24	12.96	4.69e-43	0.88
chr8-1286	chr8	22867596	22867766	+	9.67	0.622	59	59	9.8	6.03	1.38e-26	9.09	1.02e-35	0.88
chr10-1197	chr10	40371730	40371900	+	9.67	0.732	63	60	11	5.45	7.91e-25	10.5	4.92e-39	0.99
chr11-1783	chr11	53413615	53413785	+	9.67	0.658	59.5	59	11	5.36	4.33e-24	8.33	9.82e-34	0.89
chr12-881	chr12	59195272	59195442	+	9.67	0.615	59	59	7.3	8.04	6.46e-33	8.71	5.43e-34	0.87
chr13-1008	chr13	41226596	41226766	+	9.67	0.714	59.5	59	11.8	4.99	1.32e-22	7.54	1.77e-31	0.9
chr13-997	chr13	46885121	46885291	+	9.67	0.553	60	60	12.2	4.9	1.33e-22	7.66	7.44e-32	0.88
chr18-710	chr18	36527790	36527960	+	9.67	0.64	60	59	14.7	4.02	2.8e-18	7.69	6.25e-32	0.87
chr19-902	chr19	42118241	42118411	+	9.67	0.767	59.5	59	11.8	4.99	1.32e-22	6.45	4.59e-28	0.94
chrX-191	chrX	12287017	12287187	+	9.67	0.585	59	59	14.3	4.13	7.91e-19	11.25	8.85e-40	0.91
chr4-1578	chr4	135335774	135335944	+	9.59	0.603	60.5	59	12.2	4.82	6.54e-22	7.63	4.55e-31	0.9
chr5-1538	chr5	87580487	87580657	+	9.59	0.799	58.5	58.5	14.3	4.1	3.29e-18	16.48	1.05e-48	0.91
chr6-1297	chr6	140747699	140747869	+	9.59	0.725	60	59	13.9	4.25	2.13e-19	5.52	2.5e-24	0.87
chr9-1265	chr9	21081575	21081745	+	9.59	0.66	60	59	9.4	6.29	1.67e-27	5.26	3.62e-23	0.85
chr9-1279	chr9	63555758	63555928	+	9.59	0.617	59.5	59	14.7	4.02	2.8e-18	6.78	1.72e-28	0.87
chr11-1795	chr11	60817158	60817328	+	9.59	0.631	59	58.5	13.9	4.22	9.11e-19	9.12	7.19e-34	0.88
chr14-824	chr14	47522338	47522508	+	9.59	0.635	59	59	10.2	5.79	1.03e-25	8.97	1.23e-34	0.87
chr4-1713	chr4	60669947	60670117	+	9.51	0.806	56	58	11.8	4.9	6.6e-22	11.89	2.23e-40	1.08
chr5-1551	chr5	33253088	33253258	+	9.51	0.772	58	58	12.6	4.59	1.42e-20	8.61	6.21e-34	0.95
chr7-1483	chr7	97622803	97622973	+	9.51	0.714	58.5	58	14.3	4.06	3.29e-18	14.82	2.15e-46	0.91
chr10-1283	chr10	92082215	92082385	+	9.51	0.738	59	58	10.2	5.69	5.96e-25	16.75	2.71e-49	0.92
chr12-855	chr12	51865890	51866060	+	9.51	0.581	60.5	58	13.9	4.18	9.11e-19	7.42	1.26e-30	0.91
chr12-902	chr12	75539345	75539515	+	9.51	0.797	58	58	14.3	4.06	3.29e-18	7.29	3.06e-30	0.9
chr14-826	chr14	63205495	63205665	+	9.51	0.727	59	59	13.1	4.52	1.32e-20	6.62	3.62e-28	0.99
chr19-909	chr19	39464070	39464240	+	9.51	0.799	59	58	8.6	6.77	1.2e-28	17.3	5.03e-49	0.93
chrX-179	chrX	14757489	14757659	+	9.51	0.779	60.5	60.5	11	5.49	7.91e-25	27.78	1.9e-61	0.92
chr1-1453	chr1	4810523	4810693	+	9.42	0.711	58.5	59	14.3	4.13	7.91e-19	5.43	3.25e-23	0.93
chr5-1544	chr5	123203697	123203867	+	9.42	0.703	58.5	58	13.1	4.44	6.02e-20	6.55	7.33e-27	0.93
chr8-1274	chr8	61558152	61558322	+	9.42	0.728	59.5	57.5	11.4	5.03	6.56e-22	7.09	3.62e-29	0.94
chr8-1413	chr8	93063562	93063732	+	9.42	0.648	54	57.5	12.6	4.55	6.55e-20	10.78	3.57e-38	1.02
chr10-1293	chr10	40071719	40071889	+	9.42	0.704	58.5	57.5	12.6	4.55	6.55e-20	5.74	2.51e-24	0.92
chr12-832	chr12	8217594	8217764	+	9.42	0.636	61.5	58	12.6	4.59	1.42e-20	7	1.03e-28	0.85
chr12-911	chr12	35506434	35506604	+	9.42	0.659	57.5	58	9.8	5.92	8.33e-26	10.61	2.32e-37	0.86
chr16-825	chr16	86826696	86826866	+	9.42	0.713	57.5	57.5	10.6	5.42	2.13e-23	12.15	7.12e-41	0.94
chrX-193	chrX	38969038	38969208	+	9.42	0.687	58	58	13.9	4.18	9.11e-19	17.53	2.48e-49	0.88
chr3-1168	chr3	121645457	121645627	+	9.34	0.65	58.5	57	12.6	4.51	6.55e-20	6.98	7.97e-29	0.87
chr4-1665	chr4	124743036	124743206	+	9.34	0.618	57.5	57	13.9	4.11	3.83e-18	4.33	1.64e-18	0.88
chr10-1322	chr10	125494620	125494790	+	9.34	0.66	57.5	57.5	14.3	4.03	1.34e-17	6.32	9.91e-27	0.87
chr15-1039	chr15	95749403	95749573	+	9.34	0.606	59	57	4.1	13.97	2.85e-44	5.1	2.35e-22	0.91
chr16-802	chr16	21857040	21857210	+	9.34	0.729	58.5	57	6.1	9.32	4.19e-35	7.78	3.64e-31	0.88
chr19-922	chr19	32551605	32551775	+	9.34	0.646	58	57	11.4	4.99	6.56e-22	6.79	3.03e-28	0.93
chr1-1519	chr1	85982030	85982200	+	9.26	0.674	57	57	13.9	4.11	3.83e-18	9.98	8.02e-36	0.88
chr4-1582	chr4	155558362	155558532	+	9.26	0.686	60.5	56.5	12.2	4.62	7.05e-20	4.09	1.41e-17	0.89
chr6-1381	chr6	54204017	54204187	+	9.26	0.675	56.5	56.5	13.9	4.07	1.58e-17	5.89	1.09e-24	0.89
chr10-1315	chr10	19490620	19490790	+	9.26	0.729	57.5	57.5	14.3	4.03	1.34e-17	12.3	1.85e-40	0.86
chr11-1910	chr11	106583193	106583363	+	9.26	0.624	56	56.5	11.4	4.95	3.29e-21	4.1	8.45e-18	0.97
chr13-1055	chr13	38739578	38739748	+	9.26	0.611	56.5	56.5	12.2	4.62	7.05e-20	8.84	2.18e-33	0.9
chr17-1070	chr17	80775018	80775188	+	9.26	0.72	57	56.5	13.5	4.2	4.43e-18	6.63	4.31e-27	0.85
chr18-715	chr18	20648514	20648684	+	9.26	0.613	59.5	58	13.5	4.31	2.4e-19	8.57	1.62e-32	0.92
chr19-939	chr19	32620998	32621168	+	9.26	0.643	57	56.5	13.5	4.2	4.43e-18	5.68	3.95e-24	0.89
chrX-190	chrX	109137407	109137577	+	9.26	0.704	59.5	57.5	12.6	4.55	6.55e-20	18.24	1.33e-49	0.92
chr5-1635	chr5	145897371	145897541	+	9.18	0.594	56	56	13.5	4.16	4.43e-18	5.09	3.27e-21	0.89
chr6-1387	chr6	25909718	25909888	+	9.18	0.777	56	56	13.5	4.16	4.43e-18	20.5	2.64e-52	0.93
chr7-1517	chr7	68916276	68916446	+	9.18	0.606	57	56	11	5.08	6.39e-22	4.03	4.78e-17	0.89
chr8-1338	chr8	41127656	41127826	+	9.18	0.713	57	56	11.8	4.73	1.57e-20	5.4	4.1e-23	0.91
chr8-1352	chr8	86600398	86600568	+	9.18	0.704	56.5	56	13.9	4.04	1.58e-17	5.24	1.6e-22	0.94
chr16-783	chr16	37525201	37525371	+	9.18	0.707	60	56	13.9	4.04	1.58e-17	10.86	7.07e-38	0.92
chr16-820	chr16	37541788	37541958	+	9.18	0.781	57.5	56	13.5	4.16	4.43e-18	4.83	4.48e-20	0.89
chr16-831	chr16	43551707	43551877	+	9.18	0.654	57	56.5	11	5.13	6.39e-22	5.1	5.52e-22	0.86
chr17-1003	chr17	49414255	49414425	+	9.18	0.719	60.5	56	8.6	6.54	5.42e-27	10.84	7.71e-38	0.92
chr19-944	chr19	34863846	34864016	+	9.18	0.77	56.5	56	13.5	4.16	4.43e-18	10.8	9.15e-38	0.9
chr19-973	chr19	49359893	49360063	+	9.18	0.714	55	56	13.5	4.16	4.43e-18	12.2	1.4e-39	0.95
chr1-1545	chr1	194471895	194472065	+	9.1	0.734	56.5	55.5	13.1	4.25	5.08e-18	10.26	5.13e-36	1.01
chr5-1637	chr5	9113699	9113869	+	9.1	0.727	55.5	55.5	13.9	4	6.43e-17	7.84	4.31e-30	0.91
chr5-1647	chr5	117979093	117979263	+	9.1	0.605	55.5	55.5	12.6	4.39	1.32e-18	4.01	5.74e-17	0.87
chr7-1518	chr7	81593483	81593653	+	9.1	0.656	57	55.5	12.6	4.39	1.32e-18	4.48	5.64e-19	0.87
chr7-1459	chr7	128617717	128617887	+	9.1	0.75	59.5	55.5	11.4	4.86	1.62e-20	10.89	4.25e-37	0.89
chr11-1804	chr11	106950526	106950696	+	9.1	0.768	59	56	13.5	4.16	4.43e-18	20.58	2.76e-51	0.91
chr13-1070	chr13	56354745	56354915	+	9.1	0.703	55.5	55.5	7.8	7.16	3.22e-28	4.54	2.98e-19	0.88
chr13-1062	chr13	58122872	58123042	+	9.1	0.582	56	55.5	11	5.04	3.26e-21	4.28	3.77e-18	0.87
chr19-948	chr19	4765314	4765484	+	9.1	0.663	56	56	10.6	5.28	1.15e-22	5.99	1.34e-24	0.86
chr3-1222	chr3	152351043	152351213	+	9.01	0.714	56	56	10.6	5.28	1.15e-22	5.68	1.04e-23	0.88
chr4-1701	chr4	133164251	133164421	+	9.01	0.723	56.5	55	12.2	4.49	3.24e-19	11.05	1.27e-37	0.89
chr5-1565	chr5	51445914	51446084	+	9.01	0.665	57.5	56.5	13.1	4.33	1.18e-18	11.84	3.99e-39	0.91
chr6-1392	chr6	99153755	99153925	+	9.01	0.713	56	55	13.5	4.09	1.85e-17	10.28	2.02e-35	0.87
chr10-1358	chr10	94080868	94081038	+	9.01	0.741	56	55	11	4.99	3.26e-21	9.88	3.42e-35	0.88
chr11-1936	chr11	108197535	108197705	+	9.01	0.619	55.5	55	13.1	4.21	5.08e-18	7.82	1.57e-29	0.9
chr12-942	chr12	83914939	83915109	+	9.01	0.673	56	55	11.4	4.82	1.62e-20	10.22	4.16e-35	0.9
chr4-1717	chr4	83569952	83570122	+	8.93	0.759	56	55	10.2	5.39	1.05e-22	9.08	1.28e-32	0.96
chr4-1719	chr4	97855776	97855946	+	8.93	0.643	56	54.5	11.8	4.61	3.5e-19	8.34	7.41e-31	0.94
chr5-1614	chr5	9028463	9028633	+	8.93	0.608	56	54.5	10.2	5.34	5.7e-22	12.68	9.95e-40	0.88
chr11-1912	chr11	108256752	108256922	+	8.93	0.776	56	55	12.2	4.49	3.24e-19	7.34	3.01e-28	0.93
chr12-953	chr12	72749620	72749790	+	8.93	0.677	55.5	54.5	12.6	4.31	5.78e-18	7.15	1.04e-27	0.86
chr13-1092	chr13	32795398	32795568	+	8.93	0.597	54.5	54.5	13.1	4.18	2.15e-17	7.65	9.14e-29	0.9
chr15-1083	chr15	103281924	103282094	+	8.93	0.68	56	55	11	4.99	3.26e-21	5.04	7.12e-21	0.85
chr16-844	chr16	26358945	26359115	+	8.93	0.618	56	54.5	13.1	4.18	2.15e-17	7.06	1.86e-27	0.88
chr17-1044	chr17	32250785	32250955	+	8.93	0.623	58	54.5	13.5	4.05	7.62e-17	8.84	1.74e-31	0.89
chr1-1522	chr1	130658164	130658334	+	8.85	0.678	57	54	11	4.9	1.64e-20	8.09	1.07e-29	0.88
chr5-1644	chr5	97056954	97057124	+	8.85	0.659	55.5	54	12.2	4.41	1.46e-18	12.59	8.99e-40	0.9
chr6-1435	chr6	59446407	59446577	+	8.85	0.83	54	54	12.2	4.41	1.46e-18	9.36	1.14e-32	0.97
chr6-1424	chr6	82085408	82085578	+	8.85	0.675	54.5	54.5	12.2	4.45	1.46e-18	6.7	6.2e-26	0.94
chr8-1379	chr8	22565431	22565601	+	8.85	0.632	55	54	8.6	6.3	2.29e-25	5.96	2.85e-24	0.89
chr8-1429	chr8	56550885	56551055	+	8.85	0.559	53.5	54	11	4.9	1.64e-20	4.91	1.52e-20	0.94
chr11-1843	chr11	120695182	120695352	+	8.85	0.596	58	54	10.6	5.09	3.18e-21	4.87	7.03e-20	0.9
chr13-1052	chr13	69596682	69596852	+	8.85	0.624	57	54	12.6	4.27	5.78e-18	6.7	1.43e-26	0.88
chr15-1075	chr15	96957197	96957367	+	8.85	0.713	56.5	54	11	4.9	1.64e-20	10.02	2.85e-34	0.9
chr16-874	chr16	35048387	35048557	+	8.85	0.668	54.5	54.5	11.4	4.77	7.83e-20	5.04	5.01e-21	0.87
chr1-1604	chr1	106193093	106193263	+	8.77	0.621	54.5	54	11.4	4.73	7.83e-20	8.49	1.11e-30	0.9
chr2-1758	chr2	34281121	34281291	+	8.77	0.757	53.5	53.5	9	5.96	1.14e-23	21.66	1.36e-50	0.9
chr3-1238	chr3	22069499	22069669	+	8.77	0.887	55	54	11.4	4.73	7.83e-20	9.55	4.42e-33	0.94
chr7-1544	chr7	25897461	25897631	+	8.77	0.676	56	57	11	5.18	1.23e-22	5.6	1.77e-22	0.92
chr14-890	chr14	11569868	11570038	+	8.77	0.713	54.5	54.5	10.2	5.34	5.7e-22	4.76	1.96e-19	0.9
chr14-885	chr14	68721277	68721447	+	8.77	0.759	55	53.5	12.2	4.37	6.5e-18	15.53	2.35e-43	0.93
chr15-1116	chr15	53164188	53164358	+	8.77	0.675	54	53.5	13.1	4.1	8.96e-17	5.89	2.02e-23	0.88
chr1-1652	chr1	89710370	89710540	+	8.69	0.651	53	53.5	13.1	4.1	8.96e-17	4.69	5.04e-19	0.9
chr4-1759	chr4	60065793	60065963	+	8.69	0.645	54.5	53	11	4.81	8.06e-20	13.9	1.96e-40	0.93
chr5-1643	chr5	93150070	93150240	+	8.69	0.636	55.5	53	11.4	4.64	3.72e-19	9.14	1.31e-31	0.87
chr6-1430	chr6	5198689	5198859	+	8.69	0.651	54	53	13.1	4.06	8.96e-17	4.71	2.02e-19	0.88
chr6-1446	chr6	37780030	37780200	+	8.69	0.745	53.5	53	10.2	5.2	3.03e-21	4.02	1.39e-16	0.98
chr8-1425	chr8	25793896	25794066	+	8.69	0.716	53.5	53	9.8	5.41	5.19e-22	11.04	2.74e-36	0.88
chr10-1403	chr10	21465360	21465530	+	8.69	0.559	54	53	10.2	5.2	3.03e-21	7.16	1.97e-27	0.9
chr10-1429	chr10	111756653	111756823	+	8.69	0.657	53.5	53	11	4.81	8.06e-20	9.37	1.66e-31	0.89
chr14-911	chr14	63158864	63159034	+	8.69	0.678	53.5	53	8.6	6.19	1.45e-24	5.63	9.71e-23	0.9
chr16-889	chr16	13359678	13359848	+	8.69	0.685	53	53	11.8	4.48	1.6e-18	4.28	1.07e-17	0.96
chr2-1830	chr2	43546584	43546754	+	8.6	0.692	52	52.5	11	4.77	3.9e-19	13.38	1.96e-39	0.95
chr3-1269	chr3	41018202	41018372	+	8.6	0.686	53	53	11.4	4.64	3.72e-19	9.26	7.45e-32	0.87
chr5-1695	chr5	37650854	37651024	+	8.6	0.646	54	52.5	11.4	4.6	1.74e-18	10.34	2.66e-34	0.89
chr6-1405	chr6	128146583	128146753	+	8.6	0.665	55.5	52.5	9.8	5.36	2.82e-21	4.66	1.02e-18	0.91
chr6-1458	chr6	141962572	141962742	+	8.6	0.67	53.5	53.5	11	4.86	8.06e-20	4.67	9.26e-19	0.98
chr8-1450	chr8	100855563	100855733	+	8.6	0.758	53	52.5	11.4	4.6	1.74e-18	12.55	4.32e-38	0.93
chr10-1460	chr10	123136276	123136446	+	8.6	0.644	52.5	52.5	12.2	4.29	2.83e-17	11.39	4.41e-36	0.89
chr12-1008	chr12	35048977	35049147	+	8.6	0.729	53	52.5	9	5.85	6.78e-23	4.25	4e-17	0.87
chrX-240	chrX	12132601	12132771	+	8.6	0.669	53	53.5	10.2	5.25	3.03e-21	5.14	1.13e-20	0.89
chr6-1503	chr6	94927891	94928061	+	8.52	0.723	52	52	11	4.72	3.9e-19	12.1	1.55e-37	0.95
chr8-1444	chr8	45324280	45324450	+	8.52	0.671	53	52	8.2	6.37	1.06e-24	6.6	2.31e-25	0.92
chr8-1398	chr8	106573220	106573390	+	8.52	0.693	54.5	52	11.8	4.4	7.23e-18	6.52	3.93e-25	0.96
chr15-1129	chr15	99907171	99907341	+	8.52	0.69	53.5	52	12.6	4.11	1.05e-16	4.59	1.27e-18	0.95
chr2-1787	chr2	83648553	83648723	+	8.44	0.752	53	51.5	12.6	4.07	4.32e-16	5.78	3e-22	0.92
chr4-1794	chr4	105072049	105072219	+	8.44	0.578	53	51.5	10.2	5.05	8.1e-20	8.76	2.2e-30	0.91
chr7-1655	chr7	114362289	114362459	+	8.44	0.701	52	52	12.6	4.11	1.05e-16	5.2	2.47e-20	0.91
chr17-1158	chr17	83870535	83870705	+	8.44	0.771	52.5	51.5	9.4	5.49	2.56e-21	8.75	3.77e-30	0.94
chr19-1016	chr19	57534179	57534349	+	8.44	0.686	53	51.5	11.4	4.51	7.94e-18	6.13	2.41e-23	0.88
chr1-1555	chr1	181000733	181000903	+	8.36	0.676	56	51.5	10.6	4.86	4.02e-19	4.37	1.84e-17	0.88
chr4-1869	chr4	101245785	101245955	+	8.36	0.622	51	51	11.4	4.47	7.94e-18	7.55	5.55e-27	0.89
chr6-1520	chr6	37605821	37605991	+	8.36	0.764	51	51	11	4.63	1.85e-18	6.84	1.36e-25	1.04
chr6-1531	chr6	145802961	145803131	+	8.36	0.643	51	51	11.4	4.47	7.94e-18	6.82	6.91e-25	0.86
chr7-1648	chr7	25432784	25432954	+	8.36	0.635	52	51	7.8	6.58	7.39e-25	8.72	1.58e-29	0.92
chr9-1508	chr9	69992260	69992430	+	8.36	0.569	51	51.5	11.4	4.51	7.94e-18	4.03	1.2e-15	0.91
chr10-1423	chr10	59973279	59973449	+	8.36	0.654	53.5	51	11.8	4.31	3.19e-17	4.77	5.56e-19	0.89
chr11-2079	chr11	110478107	110478277	+	8.36	0.597	52	51	12.6	4.03	4.32e-16	4.11	2.17e-16	0.89
chr11-2083	chr11	120980853	120981023	+	8.36	0.718	52	51	11.8	4.31	3.19e-17	9.2	2.37e-31	0.95
chr19-1017	chr19	58413304	58413474	+	8.36	0.67	53	51.5	10.2	5.05	8.1e-20	6.57	8.16e-25	0.9
chrX-251	chrX	37085260	37085430	+	8.36	0.623	51.5	51	8.6	5.95	5.48e-23	10.68	2.56e-34	0.98
chr2-1843	chr2	152666292	152666462	+	8.28	0.735	52	50.5	12.2	4.13	5.07e-16	4.33	8.08e-17	0.92
chr10-1494	chr10	25596084	25596254	+	8.28	0.708	51	50.5	11.8	4.27	1.38e-16	8.68	1.93e-29	0.89
chr13-1162	chr13	109615906	109616076	+	8.28	0.649	51.5	50.5	11	4.59	8.61e-18	8.65	2.21e-29	0.92
chr1-1692	chr1	164446631	164446801	+	8.19	0.622	52	50	10.2	4.9	4.07e-19	4.53	9.13e-18	0.98
chr4-1891	chr4	115659294	115659464	+	8.19	0.768	50.5	50	10.6	4.71	1.94e-18	11.91	3.7e-35	0.93
chr9-1517	chr9	69383127	69383297	+	8.19	0.817	50.5	50	7.3	6.81	4.87e-25	8.37	6.25e-29	0.97
chr9-1518	chr9	77892358	77892528	+	8.19	0.589	50.5	50	7.8	6.45	4.88e-24	9.14	1.25e-30	0.91
chr11-2137	chr11	97850532	97850702	+	8.19	0.654	50.5	50	11.4	4.38	3.57e-17	12.06	3.36e-35	0.89
chr13-1135	chr13	60674975	60675145	+	8.19	0.65	52.5	50.5	9	5.63	2.25e-21	5.2	3.89e-20	0.88
chr16-950	chr16	45990599	45990769	+	8.19	0.697	50	50	11	4.54	8.61e-18	4.43	6.72e-17	0.88
chr1-1690	chr1	133645770	133645940	+	8.11	0.626	52	51.5	10.6	4.86	4.02e-19	9.45	1.67e-30	0.91
chr3-1376	chr3	97919197	97919367	+	8.11	0.643	49.5	49.5	12.2	4.05	2.08e-15	10.63	6e-33	0.89
chr5-1840	chr5	121733989	121734159	+	8.11	0.755	50.5	50	11.8	4.23	1.38e-16	4.19	3.89e-16	0.94
chr10-1516	chr10	40103858	40104028	+	8.11	0.658	50	49.5	10.6	4.67	9.21e-18	5.89	8.78e-22	0.92
chr13-1183	chr13	50594048	50594218	+	8.11	0.769	50.5	49.5	6.5	7.58	2.3e-26	13.41	1.72e-37	0.96
chr16-904	chr16	26562445	26562615	+	8.11	0.732	52.5	49.5	7.3	6.74	3.32e-24	6.81	1.41e-24	0.92
chr16-949	chr16	45952622	45952792	+	8.11	0.598	50	49.5	11	4.49	3.93e-17	6.44	2.18e-23	0.88
chr17-1177	chr17	5569372	5569542	+	8.11	0.682	51	49.5	9.8	5.06	4.04e-19	7.1	3.68e-25	0.89
chr3-1305	chr3	79222674	79222844	+	8.03	0.752	52	49	11.4	4.29	1.57e-16	5.69	9.1e-21	0.89
chr3-1358	chr3	129930704	129930874	+	8.03	0.638	50.5	49	10.6	4.62	9.21e-18	8.81	1.34e-28	0.88
chr4-1906	chr4	49451617	49451787	+	8.03	0.674	50	49.5	11.8	4.18	5.89e-16	8.61	6.23e-29	0.94
chr6-1536	chr6	108316525	108316695	+	8.03	0.592	50.5	49.5	11.8	4.18	5.89e-16	6.84	1.15e-24	0.91
chr15-1191	chr15	9119810	9119980	+	8.03	0.661	50.5	49	11	4.45	3.93e-17	4.29	1.62e-16	0.95
chr5-1826	chr5	96163091	96163261	+	7.95	0.642	51	48.5	9.8	4.95	2.03e-18	4.18	8.01e-16	0.92
chr6-1550	chr6	95711055	95711225	+	7.95	0.661	50	48.5	11	4.4	1.76e-16	4.05	3.97e-15	0.93
chr15-1209	chr15	39116851	39117021	+	7.95	0.677	49.5	48.5	7.3	6.61	2.23e-23	4.08	2.81e-15	0.91
chr16-925	chr16	33379667	33379837	+	7.95	0.657	51	49	12.2	4	2.08e-15	4.09	1.83e-15	0.9
chr16-962	chr16	52071939	52072109	+	7.95	0.675	49.5	48.5	10.6	4.57	4.28e-17	11.79	4.41e-34	0.95
chrX-270	chrX	140493644	140493814	+	7.95	0.689	50	48.5	11.4	4.25	6.77e-16	10.1	3.74e-31	0.91
chr2-1966	chr2	69136339	69136509	+	7.87	0.656	49	48	9.4	5.12	3.92e-19	4.39	3.95e-16	0.88
chr2-1906	chr2	69898226	69898396	+	7.87	0.593	50.5	48	9.4	5.12	3.92e-19	5.72	1.89e-20	0.93
chr4-1938	chr4	143212711	143212881	+	7.87	0.612	49.5	48	8.2	5.88	1.58e-21	5.66	7.43e-21	0.89
chr6-1579	chr6	6457160	6457330	+	7.87	0.696	49	48	9.8	4.9	2.03e-18	8.52	3.64e-28	0.91
chr6-1521	chr6	58554070	58554240	+	7.87	0.724	51	48	10.2	4.71	9.69e-18	13.69	3.67e-37	0.95
chr10-1556	chr10	31585527	31585697	+	7.87	0.656	48.5	48.5	9.4	5.17	3.92e-19	10.31	9.62e-32	0.89
chr15-1232	chr15	34254394	34254564	+	7.87	0.623	48.5	48.5	11	4.4	1.76e-16	9.06	1.54e-28	0.93
chr18-871	chr18	21072654	21072824	+	7.87	0.708	48	48	9.8	4.9	2.03e-18	7.77	5.59e-26	0.9
chr19-1089	chr19	12613825	12613995	+	7.87	0.709	49.5	48	8.2	5.88	1.58e-21	11.82	1.17e-33	0.93
chr1-1831	chr1	65169815	65169985	+	7.78	0.613	47.5	47.5	8.2	5.82	9.32e-21	5.49	9.26e-20	0.88
chr1-1790	chr1	102735417	102735587	+	7.78	0.762	49	47.5	10.6	4.48	1.95e-16	9.35	4.03e-29	0.92
chr5-1834	chr5	38500145	38500315	+	7.78	0.623	50.5	48	11	4.36	1.76e-16	5.18	8.42e-19	0.89
chr5-1931	chr5	66132374	66132544	+	7.78	0.612	48	47.5	10.2	4.66	4.58e-17	4.3	5.76e-16	0.93
chr10-1591	chr10	107115229	107115399	+	7.78	0.739	48	47.5	11.8	4.02	1e-14	8.62	7.89e-28	0.92
chr11-2212	chr11	77357941	77358111	+	7.78	0.806	48.5	47.5	10.6	4.48	1.95e-16	15.05	3.19e-38	0.92
chr11-2237	chr11	117247106	117247276	+	7.78	0.579	48	47.5	11.8	4.02	1e-14	5.35	2.5e-19	0.91
chr1-1797	chr1	169187874	169188044	+	7.7	0.686	49	47	10.6	4.43	1.95e-16	15.48	9.21e-39	0.98
chr2-1992	chr2	32445944	32446114	+	7.7	0.691	48	47	2.4	19.2	6.56e-43	4.45	1.61e-16	0.92
chr6-1640	chr6	24641502	24641672	+	7.7	0.721	47	47.5	8.6	5.55	6.21e-20	8.81	1.82e-27	0.92
chr6-1636	chr6	146909340	146909510	+	7.7	0.708	47.5	47	8.2	5.76	9.32e-21	4.26	8.38e-16	0.89
chr10-1608	chr10	96654199	96654369	+	7.7	0.695	47.5	47.5	11	4.31	7.71e-16	6.36	2.16e-21	0.88
chr13-1234	chr13	101832391	101832561	+	7.7	0.642	48	47	10.2	4.61	4.58e-17	12.9	1.41e-34	0.91
chr17-1184	chr17	10695598	10695768	+	7.7	0.693	50.5	47	9.4	5.01	2.02e-18	11.69	1.87e-33	0.98
chrX-278	chrX	7761706	7761876	+	7.7	0.626	49	47	11.4	4.12	2.86e-15	4.14	2.24e-15	0.89
chrX-271	chrX	150598251	150598421	+	7.7	0.763	50	47	9.4	5.01	2.02e-18	7.54	2.01e-25	0.96
chr1-1811	chr1	187208580	187208750	+	7.62	0.704	48.5	46.5	10.2	4.56	2.12e-16	8.83	1.06e-27	0.95
chr3-1426	chr3	14699620	14699790	+	7.62	0.714	47.5	47	9	5.24	3.71e-19	10.91	2.59e-31	0.91
chr4-2042	chr4	103382386	103382556	+	7.62	0.699	46.5	46.5	11	4.22	3.31e-15	5.28	2.24e-18	0.9
chr5-1974	chr5	100377479	100377649	+	7.62	0.699	47	46.5	11.4	4.07	1.19e-14	4.53	3.83e-16	0.94
chr7-1794	chr7	126583414	126583584	+	7.62	0.616	47.5	47.5	9.4	5.06	2.02e-18	4.9	1.55e-17	0.9
chr9-1535	chr9	74971339	74971509	+	7.62	0.739	50	46.5	10.2	4.56	2.12e-16	4.06	1.32e-14	1.01
chr10-1598	chr10	41491227	41491397	+	7.62	0.727	47.5	47	9.4	5.01	2.02e-18	4.23	3.04e-15	0.92
chr16-1003	chr16	24469378	24469548	+	7.62	0.634	47	46.5	10.6	4.38	8.68e-16	7.8	2.44e-25	0.93
chr16-1023	chr16	42910103	42910273	+	7.62	0.575	46.5	46.5	11	4.22	3.31e-15	4.19	4.48e-15	0.9
chr18-906	chr18	46551369	46551539	+	7.62	0.767	46	46.5	9.8	4.75	4.83e-17	7.94	1.2e-25	0.99
chr3-1458	chr3	40943657	40943827	+	7.54	0.781	46.5	46.5	10.2	4.56	2.12e-16	4.56	1.45e-16	0.93
chr6-1674	chr6	116071889	116072059	+	7.54	0.64	46.5	46	7.3	6.27	9.39e-22	4.99	5.17e-18	0.91
chr8-1645	chr8	56564667	56564837	+	7.54	0.536	46.5	46	10.2	4.51	2.12e-16	9.01	4.61e-28	0.94
chr8-1578	chr8	109813129	109813299	+	7.54	0.729	48.5	46.5	8.2	5.7	5.4e-20	6.16	1.85e-21	0.91
chr9-1619	chr9	109959938	109960108	+	7.54	0.645	47	46	6.9	6.63	1.01e-22	11.35	3.15e-32	0.94
chr13-1307	chr13	96795407	96795577	+	7.54	0.73	46	46	9	5.13	1.95e-18	13.95	4.92e-36	0.88
chr14-1036	chr14	59418390	59418560	+	7.54	0.545	46.5	46	9.4	4.9	1.01e-17	6.73	5.79e-23	0.93
chr18-898	chr18	37928743	37928913	+	7.54	0.572	46.5	46.5	9	5.18	1.95e-18	4.34	1.73e-15	0.91
chr2-2052	chr2	72880113	72880283	+	7.46	0.761	47	45.5	10.6	4.29	3.79e-15	10.46	6.39e-30	0.88
chr2-2053	chr2	72970459	72970629	+	7.46	0.701	47	45.5	7.8	5.87	4.52e-20	7	1.69e-22	0.89
chr3-1454	chr3	122196807	122196977	+	7.46	0.683	47	47	10.2	4.61	4.58e-17	5.4	1.02e-18	0.92
chr4-2012	chr4	32607467	32607637	+	7.46	0.683	47	45.5	10.6	4.29	3.79e-15	9.87	6.82e-29	0.88
chr4-2033	chr4	154154219	154154389	+	7.46	0.669	47	46	10.6	4.34	8.68e-16	5.73	1.13e-19	0.9
chr13-1300	chr13	36713905	36714075	+	7.46	0.637	46	45.5	10.6	4.29	3.79e-15	9.89	6.32e-29	0.9
chr14-1001	chr14	48153115	48153285	+	7.46	0.701	47.5	47	9	5.24	3.71e-19	8.03	1.66e-25	0.92
chr16-1012	chr16	13411770	13411940	+	7.46	0.685	46.5	45.5	7.8	5.87	4.52e-20	6.69	3.21e-22	0.9
chr19-1158	chr19	32653133	32653303	+	7.46	0.742	46.5	45.5	7.8	5.87	4.52e-20	7.43	5.51e-24	0.87
chr2-2061	chr2	146311109	146311279	+	7.37	0.731	47	45.5	6.5	6.97	6.53e-23	7.39	4.41e-24	0.92
chr8-1694	chr8	41142868	41143038	+	7.37	0.624	45	45.5	11	4.13	1.39e-14	9.33	1.61e-27	0.94
chr8-1682	chr8	93279633	93279803	+	7.37	0.658	45.5	45.5	11	4.13	1.39e-14	4.49	5.06e-16	0.91
chr10-1634	chr10	7727181	7727351	+	7.37	0.746	46.5	45	11	4.09	1.39e-14	5.14	1.46e-17	0.92
chr11-2243	chr11	4571455	4571625	+	7.37	0.665	47.5	45	11	4.09	1.39e-14	12.12	9.78e-33	0.93
chr14-1066	chr14	68299954	68300124	+	7.37	0.721	45	45	10.6	4.24	3.79e-15	6.9	6.43e-23	0.91
chr18-937	chr18	60386117	60386287	+	7.37	0.611	45	45	8.6	5.25	1.85e-18	4.87	6.9e-16	0.9
chr18-926	chr18	67700507	67700677	+	7.37	0.772	45.5	45	10.6	4.24	3.79e-15	6.78	1.25e-22	0.96
chr18-877	chr18	70545198	70545368	+	7.37	0.641	48	45	9.8	4.6	2.28e-16	4.83	4.02e-17	0.92
chrX-304	chrX	60315983	60316153	+	7.37	0.687	46	46	11.4	4.03	1.19e-14	10.22	1.04e-29	0.91
chr2-2067	chr2	177925872	177926042	+	7.29	0.745	47	44.5	11	4.04	5.73e-14	29.07	7.13e-48	0.92
chr5-1992	chr5	63910623	63910793	+	7.29	0.693	46.5	44.5	8.6	5.19	9.74e-18	7.5	1.21e-23	0.88
chr8-1623	chr8	11089157	11089327	+	7.29	0.533	47	44.5	11	4.04	5.73e-14	5.18	1.06e-17	0.87
chr13-1335	chr13	114802031	114802201	+	7.29	0.584	45	44.5	10.2	4.36	4.28e-15	7.69	3.07e-24	0.92
chr15-1291	chr15	57913004	57913174	+	7.29	0.643	46.5	44.5	10.6	4.2	1.62e-14	4.63	5.61e-16	0.98
chr16-1054	chr16	7094407	7094577	+	7.29	0.598	44.5	44.5	11	4.04	5.73e-14	7.25	4.52e-23	0.87
chr16-1061	chr16	87488651	87488821	+	7.29	0.729	44.5	44.5	11	4.04	5.73e-14	10.75	9.33e-30	0.89
chr5-2082	chr5	100371295	100371465	+	7.21	0.66	44.5	44	9.8	4.49	1.06e-15	4	5.42e-14	0.93
chr6-1760	chr6	145782863	145783033	+	7.21	0.76	44.5	44.5	9.8	4.55	1.06e-15	7.9	1.05e-24	0.93
chr7-1815	chr7	37971119	37971289	+	7.21	0.707	46.5	44	10.2	4.31	4.28e-15	13.43	3.89e-33	0.94
chr7-1863	chr7	73548699	73548869	+	7.21	0.736	45	44	9.4	4.69	2.41e-16	13.37	7.4e-33	0.9
chr9-1702	chr9	96892039	96892209	+	7.21	0.657	44.5	44.5	9	4.96	5.07e-17	4.41	2.03e-15	0.89
chr10-1728	chr10	69206167	69206337	+	7.21	0.71	44	44	10.6	4.15	1.62e-14	7.04	3.78e-21	1.02
chr16-1059	chr16	76226007	76226177	+	7.21	0.723	44.5	44	9.4	4.69	2.41e-16	4.79	1.19e-16	0.94
chr17-1335	chr17	5550494	5550664	+	7.21	0.634	44	44	9	4.9	5.07e-17	6.01	3.18e-20	0.9
chr19-1167	chr19	20451167	20451337	+	7.21	0.657	46	44	7.8	5.68	2.64e-19	10.06	5.32e-28	0.9
chr19-1168	chr19	20600034	20600204	+	7.21	0.662	46	45	10.6	4.24	3.79e-15	6.55	1.32e-21	0.92
chr2-2202	chr2	167783411	167783581	+	7.13	0.679	44	44	10.2	4.31	4.28e-15	4.1	7.09e-14	0.91
chr7-1898	chr7	119560046	119560216	+	7.13	0.628	44	43.5	4.9	8.89	6.35e-26	4.64	2.31e-15	0.88
chr7-1887	chr7	143286585	143286755	+	7.13	0.649	44.5	43.5	6.1	7.11	2.83e-22	6.89	5.76e-22	0.9
chr8-1706	chr8	119894250	119894420	+	7.13	0.959	45	43.5	6.1	7.11	2.83e-22	11.21	7.8e-30	0.98
chr9-1710	chr9	52013153	52013323	+	7.13	0.69	44	43.5	10.2	4.27	1.86e-14	9.71	1.34e-27	0.9
chr9-1723	chr9	110357397	110357567	+	7.13	0.714	44	43.5	2.9	15.23	3.99e-35	6.2	4.34e-20	0.94
chr10-1676	chr10	61128877	61129047	+	7.13	0.676	45	44	10.2	4.31	4.28e-15	10.66	5.58e-29	0.88
chr13-1315	chr13	24558031	24558201	+	7.13	0.677	45.5	44	9.4	4.69	2.41e-16	8.56	2.62e-25	0.91
chr13-1343	chr13	93719766	93719936	+	7.13	0.694	44.5	43.5	6.1	7.11	2.83e-22	6.48	1.57e-20	0.92
chrX-339	chrX	77510996	77511166	+	7.13	0.58	43.5	43.5	9.4	4.64	1.14e-15	4.74	5.38e-16	0.89
chr4-2153	chr4	41129488	41129658	+	7.05	0.727	43.5	43	9.8	4.39	4.78e-15	6.26	8.41e-20	0.97
chr5-2139	chr5	66027950	66028120	+	7.05	0.627	43	43	7.3	5.86	2.19e-19	4.92	2.31e-16	0.95
chr9-1734	chr9	64795091	64795261	+	7.05	0.672	43.5	43	6.9	6.2	2.79e-20	5.98	1.01e-19	0.9
chr10-1751	chr10	69001704	69001874	+	7.05	0.671	43.5	43	9.8	4.39	4.78e-15	10.36	1.08e-28	0.92
chr12-1170	chr12	75746544	75746714	+	7.05	0.715	45.5	43	10.2	4.22	1.86e-14	9.71	1.34e-27	0.93
chr13-1368	chr13	14180572	14180742	+	7.05	0.752	43.5	43	4.5	9.58	2.24e-27	18.72	5.89e-39	0.92
chr13-1344	chr13	95952568	95952738	+	7.05	0.694	44.5	43	8.2	5.27	9.18e-18	7.57	1.78e-23	0.9
chr16-1075	chr16	26644376	26644546	+	7.05	0.769	43.5	43	8.2	5.27	9.18e-18	7.02	2.93e-22	0.97
chr17-1423	chr17	32493550	32493720	+	7.05	0.601	41	43	10.2	4.22	1.86e-14	4.83	4.26e-16	1.01
chr17-1349	chr17	53626243	53626413	+	7.05	0.752	44	43	10.6	4.05	6.76e-14	5.57	1.34e-18	0.94
chr19-1200	chr19	55148197	55148367	+	7.05	0.662	44.5	43	10.2	4.22	1.86e-14	4.13	3.8e-14	0.94
chrX-341	chrX	142516697	142516867	+	7.05	0.614	43.5	43.5	7.8	5.61	1.5e-18	12.27	1.44e-31	0.93
chr2-2216	chr2	50339207	50339377	+	6.97	0.648	43.5	42.5	9.8	4.34	2.11e-14	12.43	6.69e-31	0.91
chr2-2141	chr2	75683491	75683661	+	6.97	0.705	45	43	10.6	4.05	6.76e-14	5.93	5.55e-19	0.89
chr3-1597	chr3	10075912	10076082	+	6.97	0.651	42.5	42.5	9.4	4.53	5.25e-15	6.87	8.6e-21	0.91
chr3-1584	chr3	70399936	70400106	+	6.97	0.711	43	42.5	10.6	4.01	2.76e-13	16.02	3.35e-35	1.01
chr5-1954	chr5	77340157	77340327	+	6.97	0.7	47.5	43	10.2	4.22	1.86e-14	8.76	4.09e-25	0.92
chr8-1748	chr8	3288706	3288876	+	6.97	0.705	43.5	43	8.2	5.27	9.18e-18	9.06	1.12e-25	0.91
chr8-1749	chr8	10866288	10866458	+	6.97	0.651	43.5	43	9	4.79	2.5e-16	5	2.01e-16	0.95
chr10-1787	chr10	87925772	87925942	+	6.97	0.701	42.5	42.5	8.6	4.96	2.54e-16	4.21	5.62e-14	0.93
chr12-1189	chr12	75733760	75733930	+	6.97	0.669	44.5	43	10.2	4.22	1.86e-14	4.11	1.21e-13	0.92
chr18-991	chr18	54931720	54931890	+	6.97	0.76	42.5	42.5	8.6	4.96	2.54e-16	8.4	1.25e-24	0.98
chr19-1220	chr19	41581750	41581920	+	6.97	0.674	43.5	42.5	10.6	4.01	2.76e-13	6.73	6.24e-21	0.92
chrX-330	chrX	140529430	140529600	+	6.97	0.617	44	42.5	10.6	4.01	2.76e-13	5.91	6.3e-19	0.92
chr3-1610	chr3	98311351	98311521	+	6.88	0.594	42.5	42.5	8.6	4.96	2.54e-16	4.32	3.41e-14	0.9
chr3-1632	chr3	106566005	106566175	+	6.88	0.681	42	42	9.8	4.29	2.11e-14	15.88	2.95e-35	0.9
chr6-1793	chr6	21837733	21837903	+	6.88	0.692	43	43	9.4	4.58	1.14e-15	8.34	1.62e-24	0.93
chr9-1768	chr9	35067402	35067572	+	6.88	0.746	42.5	42	8.6	4.9	2.54e-16	9.5	1.21e-26	0.9
chr9-1774	chr9	108275117	108275287	+	6.88	0.613	42.5	42.5	9	4.74	1.21e-15	7.69	3.24e-23	0.9
chrX-325	chrX	36600205	36600375	+	6.88	0.592	44	42	9.4	4.48	5.25e-15	5	1.28e-16	0.95
chr3-1619	chr3	14783322	14783492	+	6.8	0.621	42	41.5	9	4.62	5.68e-15	6.1	5.46e-19	0.88
chr3-1639	chr3	14873012	14873182	+	6.8	0.561	41.5	41.5	7.8	5.35	4.57e-17	5.81	2.89e-18	0.95
chr4-2204	chr4	14810278	14810448	+	6.8	0.64	42.5	42.5	9.4	4.53	5.25e-15	8.05	3.2e-23	0.91
chr6-1844	chr6	142752438	142752608	+	6.8	0.75	42	42.5	10.2	4.17	7.89e-14	5	2.91e-16	0.91
chr8-1764	chr8	22524884	22525054	+	6.8	0.738	43	41.5	8.2	5.09	2.52e-16	8.57	3.33e-24	0.91
chr8-1713	chr8	22627424	22627594	+	6.8	0.713	44.5	41.5	10.2	4.07	3.27e-13	4.7	3.46e-15	0.96
chr8-1866	chr8	115420772	115420942	+	6.8	0.76	41	41.5	9	4.62	5.68e-15	7.49	4.15e-22	1
chr12-1245	chr12	71880149	71880319	+	6.8	0.711	43	41.5	9.4	4.42	2.37e-14	4.01	5.08e-13	0.96
chr14-1124	chr14	79632513	79632683	+	6.8	0.761	42.5	41.5	6.9	5.98	1.06e-18	4.32	5.11e-14	0.96
chr16-1112	chr16	42836501	42836671	+	6.8	0.725	42	42	10.2	4.12	7.89e-14	10.6	1.31e-27	1.02
chr19-1264	chr19	57320814	57320984	+	6.8	0.664	41.5	41.5	9.4	4.42	2.37e-14	4.74	2.51e-15	0.93
chrX-310	chrX	94212752	94212922	+	6.8	0.569	45.5	41.5	7.3	5.65	7.4e-18	9.41	1.07e-25	0.95
chr1-2016	chr1	128766281	128766451	+	6.72	0.664	43	41	8.6	4.79	1.25e-15	7.46	3.13e-22	0.93
chr4-2293	chr4	131888581	131888751	+	6.72	0.664	41	41	6.9	5.91	1.06e-18	4.64	3.46e-15	0.9
chr6-1888	chr6	114913267	114913437	+	6.72	0.681	41	41	10.2	4.02	3.27e-13	6.83	7.02e-21	0.91
chr12-1242	chr12	55904894	55905064	+	6.72	0.638	43	42	7.3	5.72	1.29e-18	10.89	3.12e-28	0.9
chr14-1149	chr14	47499032	47499202	+	6.72	0.709	41	41	5.7	7.18	1.21e-21	5.67	4.54e-18	0.95
chr14-1119	chr14	56605237	56605407	+	6.72	0.705	42.5	41.5	8.2	5.09	2.52e-16	10.11	4.79e-27	0.94
chr16-1093	chr16	4722541	4722711	+	6.72	0.665	42.5	41.5	8.6	4.84	1.25e-15	4.21	2.2e-13	0.91
chr16-1072	chr16	15550896	15551066	+	6.72	0.613	43.5	41	9.8	4.19	9.12e-14	8.03	2.22e-23	0.91
chr16-1079	chr16	78470484	78470654	+	6.72	0.696	43.5	41	9	4.57	5.68e-15	5.04	2.28e-16	0.95
chr18-992	chr18	58270893	58271063	+	6.72	0.714	42.5	41	10.2	4.02	3.27e-13	9.01	3.36e-25	0.9
chr19-1266	chr19	4800574	4800744	+	6.72	0.683	41	41	6.9	5.91	1.06e-18	6.12	3.2e-19	0.99
chr1-2076	chr1	75024551	75024721	+	6.64	0.608	41.5	41	9.8	4.19	9.12e-14	7.77	3.63e-22	0.91
chr2-2314	chr2	83833209	83833379	+	6.64	0.656	41.5	42	9	4.68	1.21e-15	10.95	1.12e-27	0.91
chr6-1851	chr6	38860316	38860486	+	6.64	0.601	41.5	40.5	6.5	6.21	8.24e-19	7.89	2.14e-22	0.92
chr8-1715	chr8	22876964	22877134	+	6.64	0.694	44.5	40.5	9.4	4.32	1.04e-13	4.32	1.03e-13	0.97
chr8-1857	chr8	56407449	56407619	+	6.64	0.693	41	40.5	9.8	4.14	3.85e-13	10.88	6.23e-27	0.9
chr10-1752	chr10	73140336	73140506	+	6.64	0.695	43.5	41	7.8	5.29	4.57e-17	9.62	1.9e-25	0.97
chr12-1283	chr12	17470600	17470770	+	6.64	0.646	41.5	40.5	9.8	4.14	3.85e-13	4.88	1.47e-15	0.89
chr13-1481	chr13	32405160	32405330	+	6.64	0.643	40.5	40.5	9.8	4.14	3.85e-13	9.23	5.28e-25	0.92
chr13-1440	chr13	93232398	93232568	+	6.64	0.625	42	40.5	7.3	5.52	4.15e-17	5.39	8.92e-17	0.91
chr1-2547	chr1	67272775	67272945	+	6.56	0.781	33	40	9.8	4.09	3.85e-13	12.14	1.97e-28	1.23
chr1-2091	chr1	179568858	179569028	+	6.56	0.68	41.5	40	9.4	4.26	1.04e-13	4.52	5.13e-14	0.96
chr3-1672	chr3	75939948	75940118	+	6.56	0.633	40.5	40	9.4	4.26	1.04e-13	6.12	8.51e-19	0.91
chr3-1615	chr3	151880097	151880267	+	6.56	0.672	42.5	41.5	9.8	4.24	9.12e-14	5.07	4.33e-16	0.89
chr6-1895	chr6	12026807	12026977	+	6.56	0.75	40.5	40	7.3	5.45	4.15e-17	14.11	9.88e-32	0.95
chr6-1842	chr6	115651104	115651274	+	6.56	0.667	42	40	9.4	4.26	1.04e-13	5.53	2.58e-17	0.89
chr8-1895	chr8	61569265	61569435	+	6.56	0.642	40	40	9.8	4.09	3.85e-13	5.02	4.69e-15	0.91
chr9-1872	chr9	69323937	69324107	+	6.56	0.662	40	40	9.4	4.26	1.04e-13	4.81	2.35e-15	0.98
chr12-1304	chr12	82883232	82883402	+	6.56	0.707	41	40	8.2	4.9	1.27e-15	8.6	6.79e-24	0.91
chr13-1363	chr13	68292878	68293048	+	6.56	0.704	44	40.5	9.8	4.14	3.85e-13	15.38	3.91e-33	1.04
chr13-1470	chr13	74762903	74763073	+	6.56	0.77	41	40	8.2	4.9	1.27e-15	13.21	1.12e-30	0.93
chr17-1417	chr17	12930786	12930956	+	6.56	0.65	41	40	9.8	4.09	3.85e-13	5.53	2.58e-17	0.92
chr18-1010	chr18	20147578	20147748	+	6.56	0.758	41.5	40	9.8	4.09	3.85e-13	6.53	9.55e-20	0.94
chr19-1272	chr19	39463079	39463249	+	6.56	0.711	41	40.5	7.8	5.23	2.43e-16	10.4	7.18e-27	0.93
chr1-2043	chr1	57391467	57391637	+	6.47	0.681	42	39.5	9.4	4.21	4.47e-13	5.2	6.88e-16	0.91
chr1-2191	chr1	72823944	72824114	+	6.47	0.669	39.5	39.5	9.8	4.03	1.58e-12	4.16	4.28e-13	0.91
chr1-2196	chr1	88166598	88166768	+	6.47	0.644	39.5	39.5	9.8	4.03	1.58e-12	5.1	1.22e-15	0.92
chr1-2166	chr1	88184899	88185069	+	6.47	0.742	40	39.5	9	4.4	1.17e-13	9.01	7.42e-24	0.94
chr1-2055	chr1	107938291	107938461	+	6.47	0.694	42	39.5	9.4	4.21	4.47e-13	4.86	3.82e-15	0.91
chr2-2422	chr2	146429780	146429950	+	6.47	0.643	39.5	39.5	7.8	5.1	1.26e-15	5.96	1.45e-17	0.92
chr3-1717	chr3	98177742	98177912	+	6.47	0.655	39.5	39.5	9.4	4.21	4.47e-13	5.17	7.94e-16	0.93
chr5-2255	chr5	136533472	136533642	+	6.47	0.662	40.5	39.5	9.8	4.03	1.58e-12	6.73	1.55e-19	0.9
chr10-1892	chr10	107116904	107117074	+	6.47	0.554	40	39.5	8.6	4.61	2.84e-14	4.57	5.2e-14	0.9
chr18-1048	chr18	31737338	31737508	+	6.47	0.681	40	39.5	8.2	4.84	6.28e-15	8.75	2.05e-23	0.9
chr19-1284	chr19	20485962	20486132	+	6.47	0.741	40.5	39.5	6.9	5.7	3.63e-17	8.8	1.68e-23	0.9
chr19-1239	chr19	32667935	32668105	+	6.47	0.721	42.5	39.5	8.2	4.84	6.28e-15	5.83	1.72e-17	0.93
chrX-380	chrX	42110711	42110881	+	6.47	0.617	39.5	39.5	6.1	6.46	6.09e-19	6.03	5.71e-18	0.91
chr5-2196	chr5	87032221	87032391	+	6.39	0.746	41.5	39	9.4	4.16	4.47e-13	4.62	1.84e-14	0.98
chr6-1976	chr6	52675570	52675740	+	6.39	0.662	39	39	7.8	5.03	1.26e-15	8.11	1.83e-22	0.91
chr6-1959	chr6	142011690	142011860	+	6.39	0.776	39.5	39	6.1	6.37	6.09e-19	8.06	2.2e-22	0.9
chr8-1881	chr8	64790579	64790749	+	6.39	0.779	40.5	39	8.2	4.78	6.28e-15	7.36	4.9e-21	0.92
chr9-1864	chr9	37069568	37069738	+	6.39	0.676	40	39	6.9	5.62	3.63e-17	7.65	1.33e-21	0.92
chr18-1036	chr18	35515375	35515545	+	6.39	0.731	40.5	39.5	7.8	5.1	1.26e-15	7.92	4.05e-22	0.92
chrX-385	chrX	12275733	12275903	+	6.39	0.754	39	39	9.4	4.16	4.47e-13	7.87	5.16e-22	0.93
chr2-2410	chr2	15070577	15070747	+	6.31	0.641	39.5	38.5	8.2	4.72	3.02e-14	8.51	1.9e-22	0.92
chr9-1848	chr9	85320405	85320575	+	6.31	0.637	40.5	38.5	8.2	4.72	3.02e-14	7.79	2.4e-21	0.95
chr14-1200	chr14	73209261	73209431	+	6.31	0.624	39.5	38.5	6.1	6.29	3.9e-18	7.14	6.51e-20	0.89
chr15-1496	chr15	77393888	77394058	+	6.31	0.694	39.5	39	8.6	4.55	2.84e-14	5.91	2.89e-17	0.92
chr15-1501	chr15	82385913	82386083	+	6.31	0.603	39.5	38.5	5.3	7.26	3.74e-20	4.66	2.94e-14	0.95
chr19-1252	chr19	9077419	9077589	+	6.31	0.787	41.5	38.5	9	4.29	5.13e-13	6.77	3.72e-19	0.92
chr19-1303	chr19	20515613	20515783	+	6.31	0.793	40	39	8.6	4.55	2.84e-14	9.36	7.71e-24	0.92
chr19-1289	chr19	39346222	39346392	+	6.31	0.667	40.5	39	9	4.35	1.17e-13	6.72	2.6e-18	0.92
chr1-2111	chr1	131214375	131214545	+	6.23	0.692	41	38	7.8	4.9	6.38e-15	5.09	2.01e-15	0.92
chr5-2297	chr5	117380269	117380439	+	6.23	0.639	39.5	38.5	9	4.29	5.13e-13	5.19	1.13e-15	0.91
chr6-1971	chr6	37532149	37532319	+	6.23	0.709	39	38	9.4	4.05	1.87e-12	4.43	1.31e-13	0.92
chr6-1931	chr6	113062385	113062555	+	6.23	0.652	40	38	9	4.23	5.13e-13	7.38	1.43e-20	0.94
chr6-1914	chr6	115615894	115616064	+	6.23	0.627	40.5	38.5	6.9	5.55	2.06e-16	5.18	4.26e-15	0.93
chr8-1941	chr8	56402427	56402597	+	6.23	0.744	39	38	6.9	5.48	2.06e-16	9.39	4.31e-24	0.9
chr9-1946	chr9	122845658	122845828	+	6.23	0.596	38.5	38	9.4	4.05	1.87e-12	4.68	8.35e-14	0.95
chr10-1877	chr10	28103443	28103613	+	6.23	0.678	40	38	7.3	5.18	1.21e-15	6.71	1.39e-18	0.9
chr10-1879	chr10	53990231	53990401	+	6.23	0.761	40	38	6.1	6.21	3.9e-18	10.09	3.76e-25	0.98
chr10-1953	chr10	61139335	61139505	+	6.23	0.702	38.5	38.5	9	4.29	5.13e-13	5.71	5.63e-17	0.9
chr12-1309	chr12	3582878	3583048	+	6.23	0.679	40.5	38	9	4.23	5.13e-13	7.8	2.26e-21	0.9
chr12-1340	chr12	43907287	43907457	+	6.23	0.782	39.5	38	8.2	4.66	3.02e-14	13.82	6.41e-30	0.94
chr1-2246	chr1	164427829	164427999	+	6.15	0.68	38.5	37.5	8.6	4.38	5.81e-13	6.25	8.87e-18	0.91
chr5-2391	chr5	86935382	86935552	+	6.15	0.766	37.5	37.5	7.3	5.11	6.32e-15	5.81	1.27e-16	0.91
chr7-2019	chr7	25837996	25838166	+	6.15	0.656	40.5	37.5	8.2	4.6	1.42e-13	7.95	6.15e-21	0.93
chr7-2087	chr7	26350338	26350508	+	6.15	0.748	39	37.5	5.7	6.57	2.81e-18	13.25	1.52e-28	0.94
chr10-1965	chr10	19443597	19443767	+	6.15	0.729	38	37.5	6.9	5.41	1.13e-15	9.78	4.44e-24	0.9
chr18-1110	chr18	21073678	21073848	+	6.15	0.73	38	37.5	9	4.18	2.19e-12	6.05	9.86e-17	0.94
chr19-1380	chr19	14516502	14516672	+	6.15	0.736	37.5	37.5	6.5	5.75	1.78e-16	12.14	4.73e-27	0.94
chr8-1962	chr8	56344738	56344908	+	6.06	0.726	38.5	37	9	4.12	2.19e-12	8.06	2.63e-21	0.94
chr10-1988	chr10	53929773	53929943	+	6.06	0.669	37.5	37	7.8	4.77	3.15e-14	5.79	9.09e-17	0.91
chr11-2783	chr11	21546733	21546903	+	6.06	0.654	37	37	9	4.12	2.19e-12	4.24	2.93e-12	0.93
chr11-2715	chr11	79737959	79738129	+	6.06	0.685	38.5	37	7.3	5.04	6.32e-15	4.96	2.27e-14	0.96
chr13-1563	chr13	47151090	47151260	+	6.06	0.656	38	37	9	4.12	2.19e-12	4.8	2.76e-14	0.91
chr16-1248	chr16	52060251	52060421	+	6.06	0.625	37.5	37	8.2	4.54	1.42e-13	4.63	7.59e-14	0.91
chr4-2535	chr4	99184756	99184926	+	5.98	0.597	36.5	36.5	8.2	4.47	6.47e-13	5.06	1.29e-14	0.9
chr5-2589	chr5	72390416	72390586	+	5.98	0.794	34	36.5	6.9	5.26	6.08e-15	10.39	3.95e-24	1.12
chr7-2187	chr7	81219389	81219559	+	5.98	0.699	37	36.5	8.6	4.26	2.53e-12	6.52	6.62e-18	0.92
chr8-2047	chr8	61543860	61544030	+	5.98	0.675	36.5	36.5	6.5	5.59	1.02e-15	5.23	1.78e-14	0.92
chr9-1903	chr9	46049608	46049778	+	5.98	0.688	39	37	7.3	5.04	6.32e-15	4.11	7.04e-12	0.89
chr11-2810	chr11	21121676	21121846	+	5.98	0.624	36.5	36.5	9	4.07	9.1e-12	9.35	1.21e-22	1.14
chr12-1407	chr12	25176758	25176928	+	5.98	0.675	37.5	36.5	6.1	5.97	1.48e-16	4.77	1.03e-13	0.96
chr13-1581	chr13	37704765	37704935	+	5.98	0.702	37.5	37	6.9	5.34	1.13e-15	5.42	6.26e-15	0.92
chr13-1612	chr13	47087868	47088038	+	5.98	0.717	36.5	36.5	7.3	4.97	3.21e-14	12.09	2.68e-26	0.93
chr14-1270	chr14	7974757	7974927	+	5.98	0.62	37	36.5	6.1	5.97	1.48e-16	5.7	5.74e-16	0.93
chrX-418	chrX	85805059	85805229	+	5.98	0.641	36.5	36.5	9	4.07	9.1e-12	11.82	3.56e-26	0.94
chrX-423	chrX	162967557	162967727	+	5.98	0.71	36.5	36.5	8.6	4.26	2.53e-12	15.43	7.86e-30	0.94
chr1-2323	chr1	128832589	128832759	+	5.9	0.635	37	36	6.9	5.19	6.08e-15	5.96	9.86e-17	0.92
chr3-1825	chr3	40987580	40987750	+	5.9	0.726	36.5	36	8.6	4.2	2.53e-12	4.04	7.43e-12	0.93
chr4-2493	chr4	16198690	16198860	+	5.9	0.709	37	36	8.6	4.2	2.53e-12	9.12	1.73e-22	1.02
chr4-2501	chr4	60822183	60822353	+	5.9	0.808	37	36	9	4.01	9.1e-12	18.9	5.03e-33	0.9
chr4-2476	chr4	83221003	83221173	+	5.9	0.605	37.5	36	6.1	5.88	1.48e-16	5.37	8.16e-15	0.91
chr13-1624	chr13	35022299	35022469	+	5.9	0.621	36	36	8.6	4.2	2.53e-12	4.09	1.53e-11	0.96
chr16-1293	chr16	52444343	52444513	+	5.9	0.635	36.5	36.5	8.6	4.26	2.53e-12	8.8	3.11e-21	0.96
chr19-1443	chr19	18568416	18568586	+	5.9	0.522	36	36	8.2	4.41	6.47e-13	4.63	1.62e-13	0.92
chr1-2252	chr1	15877178	15877348	+	5.82	0.684	38	35.5	8.6	4.14	1.07e-11	8.52	8.36e-21	0.99
chr1-2357	chr1	170862319	170862489	+	5.82	0.727	36.5	35.5	8.6	4.14	1.07e-11	5.07	4.19e-14	0.91
chr1-2360	chr1	182427564	182427734	+	5.82	0.693	36.5	35.5	8.2	4.35	2.88e-12	4.64	5.04e-13	0.89
chr2-2647	chr2	7259679	7259849	+	5.82	0.75	35.5	35.5	8.2	4.35	2.88e-12	5.91	5.21e-16	0.89
chr2-2543	chr2	128179977	128180147	+	5.82	0.571	37.5	35.5	7.8	4.58	7.09e-13	5.52	3.65e-15	0.89
chr3-1821	chr3	142719950	142720120	+	5.82	0.762	37	35.5	8.2	4.35	2.88e-12	4.51	1.06e-12	0.95
chr4-2578	chr4	11090226	11090396	+	5.82	0.659	35.5	35.5	5.7	6.22	1.16e-16	4.15	1.02e-11	0.91
chr9-2023	chr9	111138873	111139043	+	5.82	0.621	36.5	35.5	8.6	4.14	1.07e-11	7.66	2.23e-19	0.91
chr9-2067	chr9	122848009	122848179	+	5.82	0.595	35.5	35.5	8.6	4.14	1.07e-11	4.55	8.27e-13	0.91
chr11-2871	chr11	12190544	12190714	+	5.82	0.726	35.5	35.5	6.1	5.8	8.75e-16	8.81	2.91e-21	0.91
chr13-1644	chr13	58232163	58232333	+	5.82	0.709	35.5	35.5	8.6	4.14	1.07e-11	6.8	8e-18	0.91
chr14-1295	chr14	116350628	116350798	+	5.82	0.725	36.5	35.5	7.3	4.83	1.58e-13	11.15	1.76e-24	0.89
chr16-1242	chr16	4753902	4754072	+	5.82	0.596	37.5	36	6.9	5.19	6.08e-15	7.74	1.58e-19	0.89
chr16-1300	chr16	92544323	92544493	+	5.82	0.709	36.5	35.5	8.6	4.14	1.07e-11	6.03	7.63e-16	0.98
chr17-1584	chr17	10840901	10841071	+	5.82	0.614	36	35.5	8.6	4.14	1.07e-11	4.38	2.36e-12	0.96
chr19-1419	chr19	46906045	46906215	+	5.82	0.653	37	36.5	8.6	4.26	2.53e-12	4.31	3.74e-12	0.92
chrX-433	chrX	60347611	60347781	+	5.82	0.684	35.5	35.5	8.6	4.14	1.07e-11	5.05	1.06e-13	0.95
chr1-2425	chr1	60650340	60650510	+	5.74	0.675	35	35	8.6	4.09	1.07e-11	6.84	4.36e-18	0.91
chr3-1864	chr3	116702833	116703003	+	5.74	0.726	36	35	8.6	4.09	1.07e-11	6.21	7.9e-17	0.92
chr4-2554	chr4	71609842	71610012	+	5.74	0.73	36	35.5	8.2	4.35	2.88e-12	14.68	1.52e-28	0.93
chr6-2086	chr6	42254657	42254827	+	5.74	0.64	36.5	35.5	5.3	6.69	1.29e-17	4.04	1.41e-11	0.92
chr6-2135	chr6	134743854	134744024	+	5.74	0.521	36	35.5	6.5	5.44	5.64e-15	7.69	6.48e-19	0.91
chr7-2213	chr7	12910332	12910502	+	5.74	0.606	36	35	6.5	5.36	5.64e-15	4.9	7.29e-14	0.93
chr11-2917	chr11	47507523	47507693	+	5.74	0.798	35	35	4.9	7.15	1.16e-18	13.05	5.95e-26	0.91
chr11-2814	chr11	53358791	53358961	+	5.74	0.588	36.5	35	4.9	7.15	1.16e-18	6.95	2.74e-18	0.91
chr15-1647	chr15	99833891	99834061	+	5.74	0.591	35	35	8.2	4.29	2.88e-12	4.96	5.34e-14	0.93
chr16-1346	chr16	77434898	77435068	+	5.74	0.725	35	35	8.2	4.29	2.88e-12	11.17	4.86e-24	0.92
chr16-1206	chr16	97944901	97945071	+	5.74	0.689	39	35	6.5	5.36	5.64e-15	5.6	6.04e-15	0.92
chr17-1596	chr17	64685218	64685388	+	5.74	0.659	36	35	7.8	4.52	7.09e-13	4.72	2.12e-13	0.92
chr19-1409	chr19	37190146	37190316	+	5.74	0.695	37	35	6.5	5.36	5.64e-15	4.54	6.08e-13	0.98
chr1-2286	chr1	48446354	48446524	+	5.65	0.704	37.5	34.5	7.3	4.7	7.6e-13	13.13	4.84e-26	0.92
chr5-2521	chr5	3342863	3343033	+	5.65	0.588	35	34.5	8.2	4.23	1.24e-11	4.31	7.52e-12	0.97
chr8-2123	chr8	61511333	61511503	+	5.65	0.74	35	34.5	6.1	5.64	5.03e-15	6.89	1.65e-17	1.05
chr11-2885	chr11	86626928	86627098	+	5.65	0.675	35.5	35	7.3	4.77	1.58e-13	4.12	4.72e-11	0.9
chr12-1428	chr12	76283120	76283290	+	5.65	0.681	37	35.5	6.9	5.12	3.18e-14	4.96	1.78e-13	0.98
chr13-1643	chr13	54557460	54557630	+	5.65	0.606	35.5	35.5	8.6	4.14	1.07e-11	4.89	2.58e-13	0.92
chr2-2696	chr2	120464945	120465115	+	5.57	0.602	35	34	6.9	4.9	1.61e-13	6.37	1.05e-16	0.94
chr3-1948	chr3	5224990	5225160	+	5.57	0.76	34	34	6.9	4.9	1.61e-13	5.88	1.03e-15	0.94
chr3-1872	chr3	14725556	14725726	+	5.57	0.689	35.5	34.5	4.1	8.46	3.72e-20	5.89	9.87e-16	0.92
chr5-2454	chr5	103778239	103778409	+	5.57	0.697	36.5	34	8.2	4.17	1.24e-11	4.32	4.88e-12	0.94
chr8-2046	chr8	36816131	36816301	+	5.57	0.609	36.5	34	7.8	4.39	3.22e-12	4.04	8.03e-11	0.93
chr9-2083	chr9	72694279	72694449	+	5.57	0.705	35	34	7.3	4.63	7.6e-13	7.57	6.48e-19	0.92
chr10-2054	chr10	19990610	19990780	+	5.57	0.638	36	34.5	8.2	4.23	1.24e-11	4.08	2.11e-11	0.91
chr11-3145	chr11	79863991	79864161	+	5.57	0.607	32	34	6.5	5.21	3.05e-14	4.28	3.03e-10	1.05
chr1-2366	chr1	23146637	23146807	+	5.49	0.69	36	33.5	7.8	4.32	1.43e-11	8.81	3.98e-20	0.91
chr1-2445	chr1	184607804	184607974	+	5.49	0.67	35	33.5	7.8	4.32	1.43e-11	4.23	2.51e-11	0.9
chr4-2716	chr4	60502157	60502327	+	5.49	0.883	33.5	33.5	3.7	9.13	1.43e-20	65.27	1.9e-47	0.91
chr7-2271	chr7	71542194	71542364	+	5.49	0.631	35	33.5	6.5	5.13	1.6e-13	4.6	1.96e-12	0.93
chr9-2031	chr9	25328121	25328291	+	5.49	0.723	36	33.5	7.3	4.56	3.55e-12	6.65	1.3e-16	0.94
chr9-2157	chr9	71738639	71738809	+	5.49	0.685	33.5	33.5	7.8	4.32	1.43e-11	4.66	2.02e-12	0.93
chr12-1530	chr12	32787246	32787416	+	5.49	0.709	34	33.5	7.8	4.32	1.43e-11	8.85	3.48e-20	0.93
chr17-1686	chr17	50558276	50558446	+	5.49	0.629	34	33.5	6.5	5.13	1.6e-13	5.84	4.75e-15	0.96
chr18-1212	chr18	21163194	21163364	+	5.49	0.713	34	33.5	7.8	4.32	1.43e-11	4.8	6.49e-13	0.91
chrX-462	chrX	16806078	16806248	+	5.49	0.782	34	33.5	7.3	4.56	3.55e-12	19.26	1.84e-30	0.9
chrX-448	chrX	20547840	20548010	+	5.49	0.62	34.5	35.5	8.2	4.35	2.88e-12	5.02	4.46e-13	0.93
chr3-1895	chr3	14782199	14782369	+	5.41	0.643	35	34	7.8	4.39	3.22e-12	5.58	1.12e-14	0.96
chr4-2683	chr4	99126416	99126586	+	5.41	0.74	34	33	7.3	4.49	3.55e-12	8.36	1.21e-19	1
chr4-2692	chr4	136470542	136470712	+	5.41	0.579	34	33	7.8	4.26	1.43e-11	4.46	4.25e-12	0.93
chr9-2163	chr9	30135888	30136058	+	5.41	0.74	33	33	8.2	4.05	5.23e-11	4.59	2.09e-12	0.97
chr13-1687	chr13	9765020	9765190	+	5.41	0.545	34	33	5.7	5.78	4.28e-15	4.44	4.95e-12	0.94
chr13-1693	chr13	35469383	35469553	+	5.41	0.69	34	33.5	8.2	4.11	5.23e-11	9.21	7.03e-21	0.91
chr16-1400	chr16	25221909	25222079	+	5.41	0.624	33	33	7.8	4.26	1.43e-11	4.26	1.43e-11	0.93
chr16-1327	chr16	86826130	86826300	+	5.41	0.725	35.5	33	5.3	6.22	5.5e-16	6.37	2.93e-16	0.94
chr19-1547	chr19	57174065	57174235	+	5.41	0.598	33.5	33.5	7.8	4.32	1.43e-11	4.65	1.47e-12	0.91
chrX-464	chrX	42013891	42014061	+	5.41	0.706	34	33	5.7	5.78	4.28e-15	7.01	1.9e-17	1.04
chr1-2590	chr1	88423105	88423275	+	5.33	0.784	32.5	32.5	7.3	4.43	1.61e-11	4.95	6.33e-13	0.99
chr6-2306	chr6	72171561	72171731	+	5.33	0.632	32.5	32.5	6.5	4.98	8.13e-13	5.13	3.87e-13	0.94
chrX-463	chrX	38403300	38403470	+	5.33	0.625	34	32.5	4.5	7.24	3.6e-17	4.61	5.72e-12	0.9
chr1-2533	chr1	164435058	164435228	+	5.24	0.594	33.5	32	7.3	4.36	1.61e-11	4.65	3.14e-12	0.94
chr1-2631	chr1	170815390	170815560	+	5.24	0.74	32	32	5.7	5.6	2.49e-14	6.76	7.17e-16	0.9
chr3-1898	chr3	41022159	41022329	+	5.24	0.713	35	32	7.3	4.36	1.61e-11	6.15	2.05e-15	0.91
chr4-2678	chr4	60142058	60142228	+	5.24	0.845	34	32	7.8	4.13	6.13e-11	40.87	6.89e-40	0.94
chr11-3121	chr11	23447137	23447307	+	5.24	0.776	32	32	6.1	5.23	1.53e-13	9.78	4.71e-21	0.91
chr13-1741	chr13	38516010	38516180	+	5.24	0.722	33	33	8.2	4.05	5.23e-11	4.38	1.42e-11	0.94
chr1-2492	chr1	92087774	92087944	+	5.16	0.615	34	32	6.1	5.23	1.53e-13	5.29	3.98e-13	0.9
chr1-2664	chr1	179578092	179578262	+	5.16	0.747	31.5	31.5	5.7	5.52	1.4e-13	4.98	1.26e-12	0.95
chr2-2938	chr2	50282653	50282823	+	5.16	0.714	31.5	31.5	5.7	5.52	1.4e-13	4.14	1.62e-10	0.92
chr2-2880	chr2	169942321	169942491	+	5.16	0.682	32.5	32	7.8	4.13	6.13e-11	6.25	5.47e-15	0.93
chr3-2086	chr3	28035338	28035508	+	5.16	0.699	31.5	31.5	6.9	4.54	1.78e-11	5.96	1.95e-14	0.9
chr4-2832	chr4	81505280	81505450	+	5.16	0.679	32	31.5	7.3	4.29	7.07e-11	7.42	5.85e-17	0.9
chr6-2304	chr6	48410756	48410926	+	5.16	0.694	32.5	32.5	7.8	4.19	6.13e-11	4.62	1.18e-11	0.95
chr7-2458	chr7	4899840	4900010	+	5.16	0.657	32	31.5	6.9	4.54	1.78e-11	4.63	7.37e-12	0.95
chr7-2366	chr7	66493561	66493731	+	5.16	0.676	33.5	32	7.8	4.13	6.13e-11	5.91	2.41e-14	0.92
chr7-2472	chr7	71333021	71333191	+	5.16	0.72	32	31.5	2.9	11.03	1.03e-21	9.28	8.31e-20	0.93
chr7-2503	chr7	79742453	79742623	+	5.16	0.605	31.5	31.5	6.9	4.54	1.78e-11	4.67	1.97e-11	0.92
chr7-2402	chr7	83644388	83644558	+	5.16	0.651	33	33	7.8	4.26	1.43e-11	4.83	3.98e-12	0.9
chr10-2278	chr10	61160734	61160904	+	5.16	0.638	31.5	31.5	7.8	4.06	2.55e-10	5.14	8.22e-13	0.92
chr11-3084	chr11	6430248	6430418	+	5.16	0.634	32.5	31.5	6.5	4.83	4.02e-12	7.07	1.39e-16	0.93
chr13-1692	chr13	34441528	34441698	+	5.16	0.659	34	31.5	4.9	6.44	2.59e-15	6.24	5.72e-15	0.9
chr13-1785	chr13	119713268	119713438	+	5.16	0.67	32.5	31.5	7.8	4.06	2.55e-10	4.14	1.67e-10	0.9
chrX-508	chrX	52145749	52145919	+	5.16	0.68	31.5	31.5	7.3	4.29	7.07e-11	4.14	1.1e-10	0.92
chrX-511	chrX	143099339	143099509	+	5.16	0.604	31.5	31.5	7.8	4.06	2.55e-10	8.42	1.2e-18	0.95
chr1-2570	chr1	13668773	13668943	+	5.08	0.586	32.5	31	4.5	6.91	2.58e-16	4.43	2.25e-11	0.96
chr2-2990	chr2	77157658	77157828	+	5.08	0.71	31	31	4.5	6.91	2.58e-16	7.83	8.8e-18	0.95
chr6-2351	chr6	141997757	141997927	+	5.08	0.69	32	31	4.1	7.6	1.99e-17	5.59	2.47e-13	0.92
chr7-2269	chr7	64802217	64802387	+	5.08	0.603	35	31	7.3	4.22	7.07e-11	4.87	2.18e-12	0.93
chr8-2355	chr8	116333055	116333225	+	5.08	0.765	31	31	3.3	9.5	4.34e-20	4	2.49e-10	0.92
chr6-2390	chr6	15184761	15184931	+	5	0.651	31	30.5	4.5	6.8	1.79e-15	5.66	1.8e-13	0.92
chr6-2440	chr6	119828170	119828340	+	5	0.667	30.5	30.5	6.9	4.4	8.02e-11	5.77	2.94e-13	0.91
chr9-2308	chr9	62042878	62043048	+	5	0.597	31	30.5	6.9	4.4	8.02e-11	4.99	4.05e-12	0.9
chr11-3154	chr11	95356779	95356949	+	5	0.706	32	30.5	7.3	4.15	3.01e-10	4.69	1.22e-11	0.97
chr13-1772	chr13	54084893	54085063	+	5	0.737	32.5	30.5	6.5	4.67	1.92e-11	5.19	1.51e-12	1.06
chrX-512	chrX	150438066	150438236	+	5	0.756	31.5	30.5	6.9	4.4	8.02e-11	10.13	4.67e-20	0.92
chr7-2556	chr7	92750501	92750671	+	4.92	0.849	30.5	30	7.3	4.09	3.01e-10	8.4	1.64e-17	0.99
chr7-2597	chr7	134188427	134188597	+	4.92	0.655	30	30	6.5	4.6	1.92e-11	4.43	4.53e-11	0.92
chr8-2376	chr8	46348240	46348410	+	4.92	0.747	30.5	30	6.1	4.9	4.11e-12	6.09	1.91e-14	0.94
chr12-1602	chr12	79501489	79501659	+	4.92	0.551	32.5	30	7.3	4.09	3.01e-10	4.05	1.06e-09	0.92
chr17-1789	chr17	7383968	7384138	+	4.92	0.844	31.5	30	7.3	4.09	3.01e-10	8.74	9.11e-18	0.99
chrX-520	chrX	139089886	139090056	+	4.92	0.759	31	30	7.3	4.09	3.01e-10	12.68	6.37e-23	0.97
chr1-2902	chr1	164369923	164370093	+	4.83	0.744	28.5	29.5	6.5	4.52	8.92e-11	5.52	8.31e-13	1.11
chr4-3059	chr4	60657832	60658002	+	4.83	0.619	29.5	29.5	5.3	5.56	7e-13	8.96	3.07e-18	0.92
chr4-2879	chr4	123017342	123017512	+	4.83	0.695	31.5	29.5	6.5	4.52	8.92e-11	4.19	4.86e-10	0.96
chr6-2506	chr6	108586432	108586602	+	4.83	0.722	29.5	29.5	4.5	6.57	1.21e-14	7.89	1.26e-16	0.94
chr8-2332	chr8	45358278	45358448	+	4.83	0.608	31	29.5	6.5	4.52	8.92e-11	5.18	2.58e-12	0.94
chr10-2303	chr10	128070121	128070291	+	4.83	0.78	31.5	30	6.9	4.33	8.02e-11	5.38	1.53e-12	0.92
chr13-1913	chr13	95663967	95664137	+	4.83	0.633	30	29.5	6.5	4.52	8.92e-11	6.12	6.95e-14	0.91
chr13-1884	chr13	109626247	109626417	+	4.83	0.75	30.5	29.5	2.4	12.05	2e-21	7.29	9.11e-16	0.94
chr16-1523	chr16	11297708	11297878	+	4.83	0.594	30	29.5	5.7	5.17	4.06e-12	5.04	7.26e-12	0.94
chr16-1534	chr16	44165203	44165373	+	4.83	0.673	30	29.5	6.5	4.52	8.92e-11	7.76	1.9e-16	0.97
chr17-1867	chr17	12403396	12403566	+	4.83	0.649	30	29.5	6.9	4.25	3.5e-10	4.96	1.06e-11	0.92
chr2-3031	chr2	48841778	48841948	+	4.75	0.699	30.5	29	6.5	4.44	8.92e-11	12.63	3.64e-22	0.92
chr3-2226	chr3	14700451	14700621	+	4.75	0.639	29.5	29	6.1	4.74	2.03e-11	6.32	5.72e-14	0.94
chr3-2286	chr3	131337806	131337976	+	4.75	0.677	29	29	6.9	4.18	3.5e-10	4.09	5.73e-10	0.92
chr5-2932	chr5	96489343	96489513	+	4.75	0.697	29	29	5.7	5.08	4.06e-12	8.23	2.74e-17	1.01
chr10-2409	chr10	54050284	54050454	+	4.75	0.682	29.5	29.5	5.7	5.17	4.06e-12	4.4	1.09e-10	0.94
chr14-1513	chr14	11870654	11870824	+	4.75	0.701	30	29	5.7	5.08	4.06e-12	5.52	2.12e-12	0.94
chr15-1896	chr15	3471574	3471744	+	4.75	0.744	29.5	29.5	6.5	4.52	8.92e-11	5.83	1.51e-13	0.92
chr15-1897	chr15	8967698	8967868	+	4.75	0.557	29.5	29	6.9	4.18	3.5e-10	4.99	6.1e-12	0.96
chr16-1513	chr16	70320976	70321146	+	4.75	0.619	30.5	29	6.9	4.18	3.5e-10	4.25	2.41e-10	0.94
chr18-1310	chr18	68260410	68260580	+	4.75	0.769	31	29.5	5.3	5.56	7e-13	6.01	7.26e-14	0.92
chrX-506	chrX	48193739	48193909	+	4.75	0.672	31.5	29	5.3	5.47	7e-13	8.29	2.27e-17	0.94
chrX-543	chrX	150459647	150459817	+	4.75	0.677	30	29	4.9	5.92	1.02e-13	5.63	3.47e-13	0.97
chr5-2967	chr5	3408283	3408453	+	4.67	0.729	28.5	28.5	6.5	4.37	4e-10	7.91	3.89e-16	0.91
chr5-2844	chr5	34409000	34409170	+	4.67	0.667	30	28.5	5.7	4.99	2.08e-11	6.94	9.41e-15	0.98
chr8-2510	chr8	90945141	90945311	+	4.67	0.644	29	28.5	5.7	4.99	2.08e-11	5.95	3.71e-13	0.92
chr11-3171	chr11	50415721	50415891	+	4.67	0.708	31.5	28.5	5.7	4.99	2.08e-11	5.53	1.97e-12	0.96
chr12-1647	chr12	78572278	78572448	+	4.67	0.73	31.5	29	5.7	5.08	4.06e-12	10.02	1.09e-18	0.92
chr13-1809	chr13	5811691	5811861	+	4.67	0.772	31.5	28.5	4.9	5.82	6.06e-13	10.78	1.71e-19	0.92
chr17-1946	chr17	80792699	80792869	+	4.67	0.648	29	28.5	3.3	8.73	3.41e-17	5.28	5.89e-12	0.91
chrX-570	chrX	101645394	101645564	+	4.67	0.716	29	28.5	6.1	4.66	9.7e-11	6.01	2.87e-13	0.92
chr4-3048	chr4	150331948	150332118	+	4.59	0.71	30	28	5.3	5.28	3.86e-12	4.16	7.63e-10	0.94
chr5-2974	chr5	53074723	53074893	+	4.59	0.724	28.5	28	5.3	5.28	3.86e-12	5.95	2.41e-13	0.96
chr6-2578	chr6	108511947	108512117	+	4.59	0.606	28.5	28	2.9	9.81	1.2e-18	4.9	1.07e-10	0.93
chr6-2543	chr6	116079213	116079383	+	4.59	0.676	29	29	5.3	5.47	7e-13	5.3	3.49e-12	0.92
chr7-2723	chr7	39813884	39814054	+	4.59	0.831	28	28	5.7	4.9	2.08e-11	4.83	2.87e-11	1.02
chr7-2639	chr7	56143543	56143713	+	4.59	0.684	29	28	6.1	4.58	9.7e-11	7.76	4.13e-16	0.94
chr9-2345	chr9	54308068	54308238	+	4.59	0.687	30.5	29.5	4.1	7.23	1.13e-15	5.88	3.13e-13	0.98
chr9-2444	chr9	63311621	63311791	+	4.59	0.673	29	28	5.3	5.28	3.86e-12	6.23	8.28e-14	0.92
chr10-2388	chr10	112990727	112990897	+	4.59	0.615	30	29.5	5.7	5.17	4.06e-12	10.45	2.39e-19	0.96
chr13-2022	chr13	64090106	64090276	+	4.59	0.576	28	28	5.3	5.28	3.86e-12	5.18	2.08e-11	0.91
chr13-2030	chr13	90474657	90474827	+	4.59	0.756	28	28	6.9	4.04	1.48e-09	7.98	1.06e-15	0.91
chr13-1945	chr13	114485363	114485533	+	4.59	0.8	29.5	28	6.5	4.29	4e-10	7.22	7.4e-15	0.96
chr15-1966	chr15	28070470	28070640	+	4.59	0.589	28.5	28	4.9	5.72	6.06e-13	6.3	2.65e-13	0.93
chrX-586	chrX	150604182	150604352	+	4.59	0.699	28.5	28	6.1	4.58	9.7e-11	13.25	5.4e-22	1
chr2-3213	chr2	35234099	35234269	+	4.51	0.695	28.5	27.5	6.1	4.49	4.48e-10	5.68	2.78e-12	0.91
chr3-2221	chr3	151851598	151851768	+	4.51	0.691	30	27.5	6.5	4.21	1.73e-09	5.99	8.36e-13	0.91
chr4-3221	chr4	19914101	19914271	+	4.51	0.673	27.5	27.5	6.5	4.21	1.73e-09	5.35	6.06e-11	0.93
chr4-3180	chr4	60591779	60591949	+	4.51	0.689	28	27.5	2	13.48	2.93e-21	25.29	3.09e-28	0.93
chr5-2931	chr5	92752640	92752810	+	4.51	0.661	29	27.5	4.9	5.62	3.49e-12	5.7	2.57e-12	0.93
chr5-3127	chr5	145975653	145975823	+	4.51	0.558	27.5	27.5	3.7	7.49	4.78e-15	4.25	9.79e-10	0.93
chr12-1856	chr12	83847584	83847754	+	4.51	0.681	27.5	27.5	3.3	8.43	2.94e-16	5.98	8.72e-13	0.91
chr15-1956	chr15	91191058	91191228	+	4.51	0.641	29	28	6.9	4.04	1.48e-09	4.45	5.62e-10	0.93
chrX-607	chrX	101388940	101389110	+	4.51	0.62	27.5	27.5	5.3	5.19	2.05e-11	5.6	3.82e-12	0.93
chrX-542	chrX	142336272	142336442	+	4.51	0.653	30	27.5	5.7	4.82	1.03e-10	8.41	3.1e-16	0.98
chr4-3232	chr4	62389356	62389526	+	4.42	0.66	27.5	27	6.1	4.41	4.48e-10	4.95	3.79e-11	0.95
chr4-3298	chr4	131957189	131957359	+	4.42	0.67	27	27	6.5	4.14	1.73e-09	7.05	1.27e-14	0.96
chr6-2674	chr6	59556948	59557118	+	4.42	0.597	27	27	5.7	4.73	1.03e-10	8.04	5.8e-16	0.93
chr7-2702	chr7	126113356	126113526	+	4.42	0.651	28.5	28	5.3	5.28	3.86e-12	5.5	1.39e-11	0.93
chr10-2597	chr10	19553019	19553189	+	4.42	0.729	27	27	5.7	4.73	1.03e-10	7.25	3.17e-14	0.97
chr10-2531	chr10	123570790	123570960	+	4.42	0.759	28	27.5	6.1	4.49	4.48e-10	6.32	1.6e-13	0.95
chr14-1622	chr14	118764130	118764300	+	4.42	0.685	28.5	27	5.7	4.73	1.03e-10	8.77	7.32e-17	0.93
chr15-2065	chr15	96341055	96341225	+	4.42	0.808	27	27	3.7	7.35	4.78e-15	8.97	4.22e-17	1.11
chr16-1664	chr16	78541837	78542007	+	4.42	0.732	27.5	27	4.1	6.62	5.55e-14	5.2	1.3e-11	0.93
chr2-3398	chr2	73919767	73919937	+	4.34	0.699	27	26.5	5.7	4.64	4.9e-10	6.36	5.91e-13	1.05
chr4-3141	chr4	61782921	61783091	+	4.34	0.867	28.5	27	6.5	4.14	1.73e-09	7.71	7.91e-15	0.93
chr4-3380	chr4	143206509	143206679	+	4.34	0.66	26.5	26.5	6.1	4.33	2e-09	5	1.03e-10	0.93
chr5-3234	chr5	150543260	150543430	+	4.34	0.722	26.5	26.5	2.9	9.28	1.12e-16	9.4	8.28e-17	0.95
chr6-2600	chr6	47312685	47312855	+	4.34	0.555	28	26.5	5.3	5	1.05e-10	7.17	4.13e-14	0.91
chr9-2558	chr9	50090606	50090776	+	4.34	0.657	27.5	26.5	6.1	4.33	2e-09	8.83	3.56e-16	0.91
chr11-3554	chr11	21235518	21235688	+	4.34	0.694	27.5	27	6.5	4.14	1.73e-09	4.09	6.3e-09	0.93
chr11-3555	chr11	27974215	27974385	+	4.34	0.973	27.5	26.5	4.9	5.41	1.94e-11	7.83	5.59e-15	0.93
chr13-2097	chr13	74748664	74748834	+	4.34	0.707	27	26.5	6.5	4.06	7.25e-09	8.91	2.91e-16	0.95
chr15-2669	chr15	73211932	73212102	+	4.34	0.744	21	26.5	4.5	5.91	2.98e-12	5.3	3.07e-11	1.51
chrX-580	chrX	60397880	60398050	+	4.34	0.753	28.5	26.5	4.9	5.41	1.94e-11	8.23	1.78e-15	0.91
chr1-2833	chr1	86747199	86747369	+	4.26	0.677	29	27.5	6.1	4.49	4.48e-10	7.55	8.38e-15	1.05
chr4-3387	chr4	7146701	7146871	+	4.26	0.737	26	26	5.3	4.9	1.05e-10	4.02	5.98e-09	0.93
chr5-3144	chr5	73381424	73381594	+	4.26	0.65	27	26	6.1	4.25	2e-09	4.16	3.1e-09	0.95
chr10-2450	chr10	87040965	87041135	+	4.26	0.698	29	26.5	5.3	5	1.05e-10	4.91	1.03e-10	0.93
chr11-3533	chr11	108349592	108349762	+	4.26	0.716	28	26	4.9	5.31	1.94e-11	4.88	3.92e-10	0.93
chr12-1946	chr12	72671711	72671881	+	4.26	0.602	26	26	3.3	7.97	2.44e-15	5.63	5.59e-12	0.93
chr15-2152	chr15	83409015	83409185	+	4.26	0.552	26	26	6.1	4.25	2e-09	4.06	1.41e-08	0.91
chr19-1921	chr19	29268940	29269110	+	4.26	0.611	26	26	6.1	4.25	2e-09	5.33	1.82e-11	0.93
chrX-599	chrX	36142313	36142483	+	4.26	0.681	27.5	26	6.1	4.25	2e-09	11.68	3.2e-19	0.97
chr1-3215	chr1	174885468	174885638	+	4.18	0.684	25.5	25.5	5.7	4.47	2.25e-09	7.35	7.49e-14	1.01
chr4-3236	chr4	95489146	95489316	+	4.18	0.674	27.5	25.5	3.7	6.95	2.52e-13	6.18	2.98e-12	0.93
chr5-3285	chr5	145428040	145428210	+	4.18	0.638	26	25.5	5.3	4.81	5.21e-10	4.91	3.43e-10	0.91
chr6-2839	chr6	100251953	100252123	+	4.18	0.667	25.5	25.5	4.9	5.21	1.04e-10	5.61	2.32e-11	0.93
chr6-2553	chr6	142040639	142040809	+	4.18	0.605	29	26.5	6.5	4.06	7.25e-09	5.67	1.83e-11	0.93
chr6-2663	chr6	142422003	142422173	+	4.18	0.714	27.5	25.5	4.5	5.68	1.74e-11	5.82	1.08e-11	0.91
chr9-2768	chr9	77891648	77891818	+	4.18	0.699	25.5	25.5	5.3	4.81	5.21e-10	4.31	4.47e-09	1.14
chr9-2587	chr9	108313841	108314011	+	4.18	0.684	27.5	25.5	4.9	5.21	1.04e-10	4.39	3.16e-09	0.91
chr11-3795	chr11	22203131	22203301	+	4.18	0.688	25.5	25.5	6.1	4.17	8.58e-09	6.24	2.49e-12	0.91
chr15-2165	chr15	3472252	3472422	+	4.18	0.711	25.5	25.5	4.5	5.68	1.74e-11	5.25	8.76e-11	0.93
chr15-2050	chr15	59417748	59417918	+	4.18	0.698	27	25.5	4.1	6.25	2.37e-12	7.4	6.36e-14	0.93
chr17-2116	chr17	6959954	6960124	+	4.18	0.817	26	26	6.1	4.25	2e-09	7.18	7.91e-14	1.04
chrX-610	chrX	12122722	12122892	+	4.18	0.747	27	26	4.9	5.31	1.94e-11	6.71	5.31e-13	0.95
chrX-626	chrX	12425589	12425759	+	4.18	0.655	26.5	25.5	5.3	4.81	5.21e-10	11.06	8.24e-18	0.91
chrX-630	chrX	60317811	60317981	+	4.18	0.622	26.5	26.5	5.7	4.64	4.9e-10	4.15	9.46e-09	0.91
chr1-3263	chr1	160754764	160754934	+	4.1	0.622	25	25.5	2.9	8.93	1.03e-15	5.5	5.72e-11	0.98
chr2-3450	chr2	72965556	72965726	+	4.1	0.675	26.5	25	6.1	4.09	8.58e-09	4.47	1.5e-09	0.99
chr4-3270	chr4	8761799	8761969	+	4.1	0.656	27	27	6.1	4.41	4.48e-10	4.02	1.17e-08	0.93
chr6-2757	chr6	58650187	58650357	+	4.1	0.659	26	25.5	4.5	5.68	1.74e-11	6.71	3.4e-13	1.08
chr9-2761	chr9	62385854	62386024	+	4.1	0.639	25.5	25.5	4.9	5.21	1.04e-10	4.23	4.47e-09	0.95
chr10-2643	chr10	21426527	21426697	+	4.1	0.709	26.5	25	5.3	4.71	5.21e-10	5.1	1.09e-10	0.93
chr10-2735	chr10	30289040	30289210	+	4.1	0.736	25.5	25	5.7	4.38	2.25e-09	9.51	6.34e-16	1.02
chr10-2790	chr10	40052161	40052331	+	4.1	0.63	25	25	5.7	4.38	2.25e-09	5.04	1.35e-10	0.93
chr10-2798	chr10	69126623	69126793	+	4.1	0.663	25	25	5.7	4.38	2.25e-09	5.39	1.29e-10	1
chr13-2261	chr13	114809277	114809447	+	4.1	0.552	25	25	5.7	4.38	2.25e-09	6.32	1.25e-12	0.95
chr17-2221	chr17	6960902	6961072	+	4.1	0.704	25	25	6.1	4.09	8.58e-09	7.13	9.3e-14	0.93
chr17-2147	chr17	70661551	70661721	+	4.1	0.626	26	25	5.3	4.71	5.21e-10	6.62	4.58e-13	0.97
chr18-1502	chr18	39656122	39656292	+	4.1	0.648	26.5	25	6.1	4.09	8.58e-09	5.34	4.15e-11	0.93
chr3-2473	chr3	50931845	50932015	+	4.02	0.641	26	24.5	5.7	4.29	9.98e-09	5.03	4.88e-10	0.92
chr3-2506	chr3	129606911	129607081	+	4.02	0.635	26	24.5	5.7	4.29	9.98e-09	4.86	6.42e-10	0.96
chr4-3623	chr4	109019442	109019612	+	4.02	0.73	24.5	24.5	6.1	4	3.55e-08	7.26	3.04e-13	0.94
chr5-3302	chr5	53924169	53924339	+	4.02	0.727	25.5	24.5	5.3	4.62	2.48e-09	5.71	3.99e-11	1.1
chr7-3036	chr7	26850173	26850343	+	4.02	0.707	25	24.5	5.3	4.62	2.48e-09	6.84	1.05e-12	0.94
chr7-2830	chr7	96981306	96981476	+	4.02	0.67	27	24.5	4.1	6.01	1.47e-11	6.6	2.19e-12	0.92
chr7-3010	chr7	122579584	122579754	+	4.02	0.667	25.5	25	4.1	6.13	2.37e-12	4.68	1.96e-09	0.92
chr8-2967	chr8	92037431	92037601	+	4.02	0.699	24.5	24.5	6.1	4	3.55e-08	7.26	1.97e-13	0.96
chr9-2870	chr9	62286969	62287139	+	4.02	0.61	24.5	24.5	4.5	5.46	9.79e-11	4.39	6.58e-09	0.96
chr9-2873	chr9	63590665	63590835	+	4.02	0.686	24.5	24.5	6.1	4	3.55e-08	6.1	1.09e-11	0.92
chr10-2771	chr10	88765588	88765758	+	4.02	0.7	25.5	24.5	6.1	4	3.55e-08	4.74	1.03e-09	0.94
chr11-3670	chr11	12474241	12474411	+	4.02	0.588	26.5	26	4.1	6.37	3.7e-13	5.51	8.13e-11	0.94
chr16-1784	chr16	44017405	44017575	+	4.02	0.74	25	24.5	5.3	4.62	2.48e-09	4.79	2.77e-09	0.92
chr17-2276	chr17	8166589	8166759	+	4.02	0.794	24.5	24.5	4.9	5.01	5.36e-10	6.36	4.64e-12	0.94
chr18-1609	chr18	46381176	46381346	+	4.02	0.559	24.5	24.5	4.9	5.01	5.36e-10	5.36	1.39e-10	0.94
chr18-1535	chr18	89874965	89875135	+	4.02	0.701	26	24.5	4.5	5.46	9.79e-11	9.88	4.36e-16	0.96
chrX-660	chrX	37701275	37701445	+	4.02	0.682	25	24.5	5.3	4.62	2.48e-09	10.87	5.44e-17	1.02
chrX-664	chrX	100470891	100471061	+	4.02	0.659	25	24.5	3.3	7.51	1.51e-13	4.7	1.78e-09	0.92
chr1-3355	chr1	66825292	66825462	+	3.93	0.727	24	24	1.6	14.71	4.27e-20	5.13	2.24e-10	0.98
chr2-3786	chr2	102203620	102203790	+	3.93	0.72	24	24	5.7	4.2	9.98e-09	4.56	6.9e-09	0.98
chr3-3252	chr3	94865969	94866139	+	3.93	0.764	19.5	24	2.9	8.41	9.03e-15	6.66	1.16e-12	1.45
chr4-3473	chr4	55421396	55421566	+	3.93	0.767	25.5	24.5	5.3	4.62	2.48e-09	8.65	4.91e-15	0.94
chr7-2914	chr7	26023784	26023954	+	3.93	0.964	26	24	3.7	6.54	1.72e-12	16.48	2.29e-19	0.96
chr7-3114	chr7	65350781	65350951	+	3.93	0.688	24.5	24	4.5	5.35	9.79e-11	7.44	5.79e-13	1
chr7-2944	chr7	97081347	97081517	+	3.93	0.644	26	24.5	4.5	5.46	9.79e-11	4.5	2.76e-09	0.94
chr8-2882	chr8	20015703	20015873	+	3.93	0.632	25	24	5.7	4.2	9.98e-09	6.63	1.28e-12	1.02
chr12-2021	chr12	78269899	78270069	+	3.93	0.836	25	24.5	6.1	4	3.55e-08	6.33	3.36e-12	0.98
chr13-2248	chr13	94261525	94261695	+	3.93	0.691	25	25	6.1	4.09	8.58e-09	4.19	1.04e-08	0.94
chr13-2349	chr13	113807188	113807358	+	3.93	0.803	24	24	4.9	4.9	5.36e-10	8.19	1.58e-14	0.94
chr15-2224	chr15	67469103	67469273	+	3.93	0.74	25	24	5.7	4.2	9.98e-09	5.7	2.76e-11	0.94
chr16-1808	chr16	35357621	35357791	+	3.93	0.803	24.5	24	4.1	5.88	1.47e-11	5.8	1.98e-11	0.96
chr16-1821	chr16	86197177	86197347	+	3.93	0.703	24.5	24	3.7	6.54	1.72e-12	7.2	2.32e-13	0.94
chr17-2425	chr17	80037375	80037545	+	3.93	0.747	23.5	24	5.3	4.53	2.48e-09	7.11	3.04e-13	1.21
chr2-3575	chr2	37651305	37651475	+	3.85	0.671	25.5	23.5	5.7	4.12	4.24e-08	4.25	2.36e-08	1.11
chr3-2712	chr3	18209869	18210039	+	3.85	0.59	23.5	23.5	4.5	5.24	5.28e-10	6.1	2.91e-11	0.92
chr4-3597	chr4	22937031	22937201	+	3.85	0.803	24.5	23.5	5.3	4.43	1.14e-08	11.26	1.18e-16	1
chr7-3236	chr7	56010941	56011111	+	3.85	0.577	23.5	23.5	2.9	8.23	7.63e-14	5.14	7.61e-10	0.94
chr7-3184	chr7	104307080	104307250	+	3.85	0.846	24	23.5	5.7	4.12	4.24e-08	7.97	1.46e-13	0.92
chr11-4356	chr11	19715248	19715418	+	3.85	0.743	22	23.5	3.7	6.4	1.14e-11	7.15	1.3e-12	1.23
chr11-4035	chr11	99314712	99314882	+	3.85	0.671	24	24	4.1	5.88	1.47e-11	5.83	6.81e-11	0.92
chr12-2078	chr12	4593510	4593680	+	3.85	0.521	24	23.5	4.9	4.8	2.65e-09	4.44	1.08e-08	0.92
chr12-2049	chr12	37608855	37609025	+	3.85	0.743	24.5	23.5	4.5	5.24	5.28e-10	17.06	1.03e-20	0.94
chr12-2101	chr12	81437618	81437788	+	3.85	0.615	24	23.5	5.3	4.43	1.14e-08	4.5	8.53e-09	0.92
chr15-2178	chr15	39869764	39869934	+	3.85	0.677	25.5	23.5	4.9	4.8	2.65e-09	4.41	1.22e-08	0.92
chr16-1877	chr16	22279879	22280049	+	3.85	0.77	23.5	23.5	3.7	6.4	1.14e-11	5.55	1.79e-10	0.92
chr16-1888	chr16	46131459	46131629	+	3.85	0.708	23.5	23.5	5.7	4.12	4.24e-08	9.8	8.72e-15	0.99
chr18-1605	chr18	36708968	36709138	+	3.85	0.637	24.5	23.5	5.7	4.12	4.24e-08	4.84	2.27e-09	0.94
chr19-2066	chr19	42535927	42536097	+	3.85	0.647	24	23.5	4.1	5.76	8.69e-11	5.37	3.29e-10	0.94
chrX-646	chrX	142245876	142246046	+	3.85	0.634	26	23.5	5.7	4.12	4.24e-08	7.99	1.38e-13	0.92
chr3-2528	chr3	79156471	79156641	+	3.77	0.706	25.5	23	3.3	7.05	1.12e-12	4.62	3.58e-09	0.94
chr6-3102	chr6	37510854	37511024	+	3.77	0.589	23	23	4.1	5.64	8.69e-11	4.84	3.49e-09	0.94
chr6-3138	chr6	116119754	116119924	+	3.77	0.742	23	23	5.3	4.34	1.14e-08	6.09	1.96e-11	0.96
chr8-3147	chr8	69545120	69545290	+	3.77	0.839	23	23	5.3	4.34	1.14e-08	5.13	5.13e-10	0.96
chr13-2366	chr13	43183130	43183300	+	3.77	0.577	23.5	23	5.7	4.03	4.24e-08	4	4.78e-08	0.94
chr13-2516	chr13	75298549	75298719	+	3.77	0.712	22	23	3.3	7.05	1.12e-12	7.64	2.21e-13	1.23
chr16-1819	chr16	52267330	52267500	+	3.77	0.707	24.5	23	5.3	4.34	1.14e-08	6.53	2.19e-11	0.96
chr17-2278	chr17	10215234	10215404	+	3.77	0.707	24.5	24	4.9	4.9	5.36e-10	9.69	1.74e-15	1.03
chr17-2403	chr17	36430448	36430618	+	3.77	0.68	23.5	23	2.9	8.06	7.63e-14	6.75	2.67e-12	0.94
chr1-3503	chr1	58403896	58404066	+	3.69	0.765	22.5	22.5	3.7	6.13	7.17e-11	4.55	1.53e-08	1.25
chr1-3420	chr1	130857769	130857939	+	3.69	0.624	23.5	22.5	5.3	4.24	4.98e-08	5.71	2.64e-10	0.92
chr2-3912	chr2	25941822	25941992	+	3.69	0.7	23	22.5	3.3	6.89	7.91e-12	6.07	8.52e-11	0.92
chr3-2690	chr3	105790409	105790579	+	3.69	0.649	24	23	4.5	5.13	5.28e-10	6.63	1.64e-11	0.94
chr4-3835	chr4	53073785	53073955	+	3.69	0.716	23	22.5	2.9	7.88	6.18e-13	4.18	6.46e-08	1.06
chr5-3494	chr5	97105150	97105320	+	3.69	0.659	24	22.5	4.5	5.01	2.73e-09	4.21	5.79e-08	0.92
chr6-3029	chr6	149059121	149059291	+	3.69	0.633	24	23	5.7	4.03	4.24e-08	4.16	7.01e-08	0.92
chr8-3237	chr8	67824307	67824477	+	3.69	0.718	22.5	22.5	4.5	5.01	2.73e-09	7.52	1.52e-12	1.01
chr8-3301	chr8	127243421	127243591	+	3.69	0.621	22.5	22.5	5.3	4.24	4.98e-08	6.04	9.29e-11	0.94
chr9-2956	chr9	13897479	13897649	+	3.69	0.667	23.5	22.5	4.9	4.6	1.26e-08	5.34	8.76e-10	0.94
chr9-3054	chr9	15319421	15319591	+	3.69	0.662	22.5	22.5	4.5	5.01	2.73e-09	5.92	8.9e-11	0.94
chr13-2353	chr13	23778318	23778488	+	3.69	0.643	23.5	22.5	4.5	5.01	2.73e-09	4.84	5.04e-09	0.92
chr13-2421	chr13	91723324	91723494	+	3.69	0.548	23	22.5	4.9	4.6	1.26e-08	5.48	5.56e-10	1.01
chr18-1702	chr18	44488197	44488367	+	3.69	0.722	23	23	4.5	5.13	5.28e-10	6.34	3.83e-11	0.96
chr19-2196	chr19	60677201	60677371	+	3.69	0.646	22.5	22.5	4.9	4.6	1.26e-08	6.04	9.29e-11	1.34
chrX-725	chrX	60370072	60370242	+	3.69	0.648	22.5	22.5	2.9	7.88	6.18e-13	11.87	1.89e-16	0.99
chr2-3850	chr2	72945215	72945385	+	3.61	0.571	23.5	22	5.3	4.15	4.98e-08	6.44	8.16e-11	0.92
chr6-3261	chr6	99039627	99039797	+	3.61	0.606	22	22	5.3	4.15	4.98e-08	4.34	2.32e-08	0.99
chr11-4091	chr11	88062077	88062247	+	3.61	0.659	23.5	22	4.5	4.9	2.73e-09	4.59	2.73e-08	0.94
chr12-2309	chr12	102034465	102034635	+	3.61	0.743	22	22.5	4.5	5.01	2.73e-09	5.23	3.12e-09	0.92
chr13-2506	chr13	55956442	55956612	+	3.61	0.615	22	22	5.3	4.15	4.98e-08	4.04	7.81e-08	0.94
chr13-2513	chr13	64306319	64306489	+	3.61	0.613	22	22	4.5	4.9	2.73e-09	4.04	7.81e-08	0.99
chr15-2488	chr15	96833141	96833311	+	3.61	0.604	22.5	22	4.5	4.9	2.73e-09	4.16	1.38e-07	0.92
chr16-2013	chr16	31829361	31829531	+	3.61	0.62	22	22	5.3	4.15	4.98e-08	6.55	1.36e-11	0.94
chr16-2022	chr16	45837786	45837956	+	3.61	0.613	22	22	5.3	4.15	4.98e-08	5.5	3.49e-10	1.04
chr2-4119	chr2	40444571	40444741	+	3.52	0.716	22	22	4.5	4.9	2.73e-09	9.4	7.82e-14	0.92
chr8-3404	chr8	10793230	10793400	+	3.52	0.658	21.5	21.5	5.3	4.05	2.1e-07	4.62	2.49e-08	0.92
chr8-3335	chr8	56304594	56304764	+	3.52	0.598	22	21.5	1.2	17.57	4.23e-19	7.14	1.25e-11	0.92
chr9-3222	chr9	31235284	31235454	+	3.52	0.693	21.5	21.5	5.3	4.05	2.1e-07	4.98	7e-09	0.94
chr10-3130	chr10	120597053	120597223	+	3.52	0.724	22.5	22.5	5.3	4.24	4.98e-08	6.18	1.68e-10	0.97
chrX-760	chrX	14899351	14899521	+	3.52	0.603	21.5	21.5	4.1	5.27	2.69e-09	7.95	1.78e-12	0.92
chrX-710	chrX	68717325	68717495	+	3.52	0.71	23	21.5	3.3	6.59	5.37e-11	9.77	3.76e-14	0.94
chr2-3990	chr2	181621309	181621479	+	3.44	0.746	23	21	2.4	8.58	2.77e-13	4.98	4.79e-09	0.97
chr3-2856	chr3	5424493	5424663	+	3.44	0.616	22	21	3.7	5.72	4.33e-10	5.93	2.29e-10	0.99
chr4-4147	chr4	88928526	88928696	+	3.44	0.614	21.5	21	4.9	4.29	5.73e-08	4.94	5.5e-09	0.94
chr6-3160	chr6	3736141	3736311	+	3.44	0.831	22.5	21	4.9	4.29	5.73e-08	8.81	1.69e-13	0.94
chr6-3313	chr6	53906055	53906225	+	3.44	0.593	21.5	21.5	4.9	4.39	5.73e-08	4.97	4.96e-09	0.94
chr8-3419	chr8	35456718	35456888	+	3.44	0.657	21.5	21	2.4	8.58	2.77e-13	4.39	3.94e-08	0.94
chr8-3338	chr8	61865449	61865619	+	3.44	0.597	22	21.5	5.3	4.05	2.1e-07	6.13	1.29e-10	0.94
chr11-4362	chr11	35789573	35789743	+	3.44	0.746	22	21	2	10.3	8.87e-15	4.71	1.24e-08	0.94
chr12-2304	chr12	91651718	91651888	+	3.44	0.758	22	21	4.1	5.15	2.69e-09	5.11	3.01e-09	0.94
chr16-2080	chr16	52325075	52325245	+	3.44	0.78	21.5	21	4.9	4.29	5.73e-08	5.51	8.29e-10	0.94
chr17-2644	chr17	77739234	77739404	+	3.44	0.7	22	21	4.5	4.68	1.35e-08	7.32	5.28e-12	1.04
chrX-751	chrX	101953801	101953971	+	3.44	0.652	22	21	2	10.3	8.87e-15	5.27	1.79e-09	0.94
chr2-4466	chr2	10009837	10010007	+	3.36	0.613	20.5	20.5	4.5	4.57	6.42e-08	4.72	8.44e-08	0.92
chr2-4468	chr2	11355753	11355923	+	3.36	0.581	20.5	20.5	3.7	5.58	2.5e-09	4.19	2.44e-07	0.92
chr2-4154	chr2	121423324	121423494	+	3.36	0.637	22	21	4.1	5.15	2.69e-09	4.98	1.61e-08	0.95
chr3-2931	chr3	76620098	76620268	+	3.36	0.688	21.5	20.5	4.9	4.19	2.49e-07	10.38	5.11e-14	0.95
chr4-4442	chr4	68923046	68923216	+	3.36	0.782	20.5	20.5	4.5	4.57	6.42e-08	9.82	1.4e-13	0.92
chr6-3478	chr6	10690667	10690837	+	3.36	0.846	20.5	20.5	4.5	4.57	6.42e-08	12.15	2.9e-15	0.92
chr7-3590	chr7	27099813	27099983	+	3.36	0.687	21.5	20.5	2.4	8.38	2.39e-12	5.91	9.84e-10	0.92
chr9-3350	chr9	103347990	103348160	+	3.36	0.657	21	20.5	4.5	4.57	6.42e-08	4.92	1.97e-08	0.92
chr10-3396	chr10	99679984	99680154	+	3.36	0.676	21	20.5	4.9	4.19	2.49e-07	6.37	2.76e-10	0.95
chr10-3513	chr10	123537308	123537478	+	3.36	0.703	20.5	20.5	4.1	5.03	1.4e-08	5.99	5.17e-10	1.05
chr12-2416	chr12	30216163	30216333	+	3.36	0.682	21	20.5	4.1	5.03	1.4e-08	4.18	1.75e-07	0.95
chr13-2655	chr13	13635494	13635664	+	3.36	0.59	20.5	20.5	4.9	4.19	2.49e-07	7.39	2.16e-11	0.97
chr15-2657	chr15	41227466	41227636	+	3.36	0.658	21	20.5	3.7	5.58	2.5e-09	4.6	5.71e-08	0.97
chrX-792	chrX	139038248	139038418	+	3.36	0.733	20.5	20.5	3.3	6.28	3.49e-10	4.14	2.96e-07	0.92
chr1-3847	chr1	16779999	16780169	+	3.28	0.701	20.5	20	3.7	5.45	2.5e-09	5.12	2.45e-08	0.92
chr3-3000	chr3	79814033	79814203	+	3.28	0.582	21	20	4.1	4.9	1.4e-08	4.56	4.45e-08	0.97
chr3-3036	chr3	136644586	136644756	+	3.28	0.768	21	20	4.5	4.46	6.42e-08	7.23	2.05e-11	0.95
chr4-4018	chr4	3829141	3829311	+	3.28	0.704	22	22	3.7	5.99	7.17e-11	6.25	2.52e-10	0.97
chr5-4258	chr5	64644668	64644838	+	3.28	0.622	20	20	4.5	4.46	6.42e-08	4.41	7.51e-08	0.95
chr6-3480	chr6	23463864	23464034	+	3.28	0.677	20.5	20	4.1	4.9	1.4e-08	8.21	2.2e-12	0.97
chr6-3241	chr6	63550382	63550552	+	3.28	0.79	22	20	4.5	4.46	6.42e-08	10.64	2.07e-14	1.05
chr8-3663	chr8	56238894	56239064	+	3.28	0.754	20.5	20	4.5	4.46	6.42e-08	5.04	8.9e-09	0.97
chr10-3327	chr10	43235831	43236001	+	3.28	0.71	21	20	4.9	4.09	2.49e-07	5.58	1.68e-09	1
chr16-2081	chr16	52689707	52689877	+	3.28	0.732	21.5	20	4.1	4.9	1.4e-08	6.63	9.24e-11	1.05
chr18-1894	chr18	39622199	39622369	+	3.28	0.754	20.5	20	4.9	4.09	2.49e-07	4.34	9.83e-08	0.95
chrX-756	chrX	162872040	162872210	+	3.28	0.596	22	20	4.5	4.46	6.42e-08	6.99	3.69e-11	0.95
chr1-4060	chr1	30783512	30783682	+	3.2	0.643	19.5	19.5	4.5	4.35	2.9e-07	5.56	6.69e-09	0.95
chr1-3825	chr1	160819614	160819784	+	3.2	0.958	21	19.5	4.1	4.78	6.95e-08	8.49	6.77e-12	1
chr5-4266	chr5	77297803	77297973	+	3.2	0.641	20	19.5	3.3	5.98	2.16e-09	4.05	8.03e-07	0.92
chr6-3482	chr6	28608965	28609135	+	3.2	0.578	20.5	19.5	2.9	6.83	2.5e-10	4.11	6.5e-07	0.95
chr7-3939	chr7	136882969	136883139	+	3.2	0.632	20.5	19.5	4.1	4.78	6.95e-08	4.53	1.05e-07	0.97
chr8-3775	chr8	57520179	57520349	+	3.2	0.621	20	19.5	3.3	5.98	2.16e-09	5.13	2.36e-08	0.92
chr11-4783	chr11	70489423	70489593	+	3.2	0.618	20.5	19.5	4.5	4.35	2.9e-07	4.29	3.55e-07	0.92
chr11-5234	chr11	111073489	111073659	+	3.2	0.741	19.5	19.5	4.5	4.35	2.9e-07	5.65	5.29e-09	0.92
chr13-2715	chr13	19622818	19622988	+	3.2	0.53	20	19.5	1.2	15.93	1.19e-16	4.59	8.72e-08	0.95
chr13-2737	chr13	50007853	50008023	+	3.2	0.788	20	19.5	2.9	6.83	2.5e-10	12.22	6.49e-14	0.93
chr14-2259	chr14	14081320	14081490	+	3.2	0.652	20	20	3.3	6.13	3.49e-10	4.72	8.44e-08	0.92
chr16-2179	chr16	24005997	24006167	+	3.2	0.623	20.5	20	4.5	4.46	6.42e-08	4.1	6.85e-07	0.95
chr18-1991	chr18	84438370	84438540	+	3.2	0.796	20	19.5	2.9	6.83	2.5e-10	6.94	1.92e-10	0.95
chr19-2524	chr19	37507759	37507929	+	3.2	0.64	20	19.5	3.3	5.98	2.16e-09	4.12	4.32e-07	0.95
chrX-817	chrX	140387492	140387662	+	3.2	0.698	20	19.5	4.5	4.35	2.9e-07	8.88	2.05e-12	0.97
chr2-4966	chr2	177900639	177900809	+	3.11	0.886	19.5	19	4.5	4.23	2.9e-07	5.52	5.08e-09	0.95
chr3-3310	chr3	57296753	57296923	+	3.11	0.636	19	19	3.3	5.82	2.16e-09	4.1	4.69e-07	0.95
chr4-4549	chr4	19696950	19697120	+	3.11	0.593	20	19	4.5	4.23	2.9e-07	4.28	2.45e-07	1
chr4-4593	chr4	115325451	115325621	+	3.11	0.762	20	19.5	4.1	4.78	6.95e-08	6.46	1.74e-09	0.95
chr5-4403	chr5	17921643	17921813	+	3.11	0.788	19.5	19	4.1	4.66	6.95e-08	4.64	7.43e-08	0.95
chr6-3942	chr6	121814997	121815167	+	3.11	0.707	19	19	2.4	7.76	1.97e-11	6.27	2.75e-09	0.95
chr7-3829	chr7	26816114	26816284	+	3.11	0.652	20.5	19.5	4.5	4.35	2.9e-07	5.43	6.44e-09	0.95
chr8-3908	chr8	36685890	36686060	+	3.11	0.667	19.5	19	4.5	4.23	2.9e-07	4.48	1.27e-07	1.2
chr10-3914	chr10	84067174	84067344	+	3.11	0.714	19	19	2.9	6.65	2.5e-10	4.73	5.54e-08	1.29
chr11-5103	chr11	51036109	51036279	+	3.11	0.712	19.5	19	2.9	6.65	2.5e-10	4.43	1.48e-07	0.95
chr12-2618	chr12	3711250	3711420	+	3.11	0.629	19.5	19	3.7	5.18	1.38e-08	5.1	1.71e-08	0.95
chr13-2942	chr13	92617535	92617705	+	3.11	0.731	19	19	2	9.32	9.05e-13	8.09	9.87e-12	0.95
chr16-2382	chr16	24801551	24801721	+	3.11	0.667	19	19	2.4	7.76	1.97e-11	6.15	8.91e-10	0.95
chr16-2331	chr16	84819943	84820113	+	3.11	0.682	19.5	19	4.5	4.23	2.9e-07	4.17	1.06e-06	0.95
chr18-2068	chr18	33552810	33552980	+	3.11	0.598	19	19	2	9.32	9.05e-13	4.27	2.52e-07	0.97
chr19-2606	chr19	12753800	12753970	+	3.11	0.672	19.5	19	4.5	4.23	2.9e-07	5.57	4.33e-09	1
chrX-800	chrX	8211928	8212098	+	3.11	0.671	20	19.5	4.5	4.35	2.9e-07	5.75	2.65e-09	0.95
chrX-832	chrX	77544668	77544838	+	3.11	0.705	19.5	19	4.5	4.23	2.9e-07	7.69	2.3e-11	0.95
chr2-5067	chr2	38917129	38917299	+	3.03	0.7	19	18.5	4.1	4.54	3.28e-07	6.69	1.03e-09	0.93
chr4-4421	chr4	48262873	48263043	+	3.03	0.776	20.5	18.5	3.7	5.04	7.21e-08	4.71	1.94e-07	0.93
chr4-4587	chr4	104962726	104962896	+	3.03	0.827	20	18.5	4.5	4.12	1.25e-06	4.52	3.49e-07	0.93
chr5-4603	chr5	34398397	34398567	+	3.03	0.714	19	18.5	3.7	5.04	7.21e-08	4.52	3.49e-07	0.98
chr6-3965	chr6	141846982	141847152	+	3.03	0.645	19	19	2.4	7.76	1.97e-11	5.13	3.67e-08	0.95
chr8-3918	chr8	68281929	68282099	+	3.03	0.671	19.5	18.5	2.9	6.48	1.68e-09	4.1	1.36e-06	0.95
chr9-3792	chr9	44152858	44153028	+	3.03	0.631	19	18.5	3.3	5.67	1.27e-08	4.09	2.76e-06	0.93
chr11-5300	chr11	22644023	22644193	+	3.03	0.724	19	18.5	4.5	4.12	1.25e-06	4.37	3.71e-07	0.95
chr12-2644	chr12	40477646	40477816	+	3.03	0.672	19.5	18.5	4.5	4.12	1.25e-06	4.08	1.43e-06	0.93
chr13-2814	chr13	33958085	33958255	+	3.03	0.583	19.5	18.5	4.5	4.12	1.25e-06	4.01	1.81e-06	0.93
chr13-2924	chr13	58032084	58032254	+	3.03	0.7	19	18.5	3.3	5.67	1.27e-08	4.06	1.55e-06	0.93
chr16-2321	chr16	43014187	43014357	+	3.03	0.692	19.5	18.5	4.5	4.12	1.25e-06	6.46	1.74e-09	0.93
chr19-2612	chr19	20696675	20696845	+	3.03	0.714	19.5	18.5	3.3	5.67	1.27e-08	4.14	1.19e-06	0.93
chr1-4272	chr1	133431275	133431445	+	2.95	0.682	19	18	2.9	6.3	1.68e-09	4.09	9.54e-07	0.95
chr4-4569	chr4	60755939	60756109	+	2.95	0.96	20	18.5	4.5	4.12	1.25e-06	44.98	7.24e-24	0.98
chr9-3841	chr9	70551636	70551806	+	2.95	0.672	19	18.5	3.7	5.04	7.21e-08	5.73	7.13e-09	0.95
chr10-3498	chr10	95878210	95878380	+	2.95	0.704	20.5	18.5	4.1	4.54	3.28e-07	5.27	2.53e-08	0.95
chr13-2884	chr13	4264625	4264795	+	2.95	0.683	19	18	3.7	4.9	7.21e-08	4.37	3.82e-07	0.98
chr17-3181	chr17	67390354	67390524	+	2.95	0.677	19.5	18	4.5	4.01	1.25e-06	4.11	9.03e-07	1.07
chr1-4252	chr1	98733508	98733678	+	2.87	0.648	19	17.5	3.7	4.77	3.58e-07	6.17	9.69e-09	0.93
chr11-5182	chr11	85663421	85663591	+	2.87	0.681	19.5	17.5	3.3	5.36	7.07e-08	5.56	4.29e-08	0.93
